# Supplementary material
Source: MDPI journal article supplement (https://www.mdpi.com/2077-0472/12/10/1685)
Supplement: s1 [file s1 › Table S1.pdf]

**Table S1 Primers used for qRT-PCR analysis and vector construction**

| Primer name                | Sequence                                              | The role of primers                        |
|----------------------------|-------------------------------------------------------|--------------------------------------------|
| OE- <i>OsCCR18</i> -FP     | agctcggtaccggggtacctctaga<br>ATGGGTGTCGAGAAGACGAC     | Construction of overexpression vector      |
| OE- <i>OsCCR18</i> -RP     | tctcgcccttgctcaccatgtcgac<br>CGGCATGGCGGCGGCAG        |                                            |
| <i>OsCCR18</i> -EDIT-FP    | ATATGGCTGGCTGACACACC                                  | Identifying mutant editing                 |
| <i>OsCCR18</i> -EDIT-RP    | ATCGCTAGCTCACGGCAT                                    |                                            |
| Pro <i>OsCCR18</i> -GUS-FP | acagctatgaccatgattacgaattc<br>TCTCTGGGGCCTTATTAATTAG  | Construction of promoter fusion GUS vector |
| Pro <i>OsCCR18</i> -GUS-RP | gaaatttaccctcagatctaccatgg<br>GCTAGCTAGAACCCTAGTGTTAA |                                            |
| <i>UBQ</i> -FP             | CACCCTGGCTGACTACAACA                                  | qRT-PCR                                    |
| <i>UBQ</i> -RP             | TTCTTCTTGCGGCAGTTGAC                                  |                                            |
| RT- <i>OsCCR18</i> -FP     | GGAGCTGCTCGACAAGGAGA                                  |                                            |
| RT- <i>OsCCR18</i> -RP     | ATGTACACGGCGCCGATCGA                                  |                                            |
| RT- <i>OsC6</i> -FP        | ATGGCGCCGTCCAAGTCCA                                   |                                            |
| RT- <i>OsC6</i> -RP        | AAGAGTAGAGAGGCGGCACA                                  |                                            |
| RT- <i>OsDPW</i> -FP       | GTAGTCGGAGATGTCAGAGAAGCC                              |                                            |
| RT- <i>OsDPW</i> -RP       | GATCCCTCCAGGTGCTCTCG                                  |                                            |
| RT- <i>OsPDA1</i> -FP      | AGGATGAGGAAGGATAGGC                                   |                                            |
| RT- <i>OsPDA1</i> -RP      | TGGTGAGGACGATGAGGA                                    |                                            |
| RT- <i>OsCYP703A</i> -FP   | AGAAGATGAGGGAGGTTGAGA                                 |                                            |
| RT- <i>OsCYP703A</i> -RP   | CACTCGTTGGTCACCGATGAT                                 |                                            |
| RT- <i>OsACOS12</i> -FP    | AGGCAGCTTAGGGACGAGT                                   |                                            |
| RT- <i>OsACOS12</i> -RP    | TCCATGGTAATTTACACGA                                   |                                            |
| RT- <i>OsWDA1</i> -FP      | <b>G</b> TAGCGCAAGCATTATGCAA                          |                                            |
| RT- <i>OsWDA1</i> -RP      | <b>C</b> CTTGTCACCACATTCATGC                          |                                            |
| RT- <i>OsDTD</i> -FP       | GCTCGAGCTTATCCATGTAGT                                 |                                            |
| RT- <i>OsDTD</i> -RP       | GTGTTGCACGTCCACTGCTT                                  |                                            |
| RT- <i>OsTDR</i> -FP       | CGCTCGCTCGTCCCAAACAT3                                 |                                            |
| RT- <i>OsTDR</i> -RP       | CGGTCATTGCTGGGTCCTTGT                                 |                                            |
| RT- <i>OsNOP</i> -FP       | TATCAGATTAAACCGACGTATGGCTTCC                          |                                            |
| RT- <i>OsNOP</i> -RP       | TGACAGGGTGGGAGGGATAACTTGGATA                          |                                            |
