# Supplementary material
Source: MDPI journal article supplement (https://www.mdpi.com/2077-0472/12/10/1685)
Supplement: s1 [file s1 › Table S2.xlsx]

## Sheet: up
Table S2. Differentially expressed genes in panicles at the S9 stage between osccr18 mutants and WT plants
gene_id	ccr18_1	ccr18_2	ccr18_3	WT_1	WT_2	WT_3	ccr18	WT	log2FoldChange	pvalue	padj	gene_chr	gene_start	gene_end	gene_strand	gene_length	gene_description
LOC_Os01g62740	585.316	688.545	882.775	5.64211	10.2381	3.92336	718.879	6.6012	6.74558	8.4685e-49	2.29996e-44	Chr1	36323780	36325016	+	913	-
LOC_Os09g09210	2976.51	2936.35	3651.73	0	0	0	3188.2	0	14.1964	9.14185e-32	1.24142e-27	Chr9	4929366	4932323	-	1514	-
LOC_Os05g18780	468.465	258.333	290.876	3.76141	0.853176	4.9042	339.225	3.17293	6.77226	1.9316e-27	1.74868e-23	Chr5	10902343	10905382	-	804	Ribonuclease P/MRP protein subunit
LOC_Os01g15740	168.903	331.407	374.306	3.76141	1.70635	3.92336	291.538	3.13037	6.55904	1.39334e-24	9.46045e-21	Chr1	8853816	8856953	+	1115	Transferase
LOC_Os06g35520	804.146	406.54	429.549	37.6141	25.5953	30.4061	546.745	31.2051	4.13274	1.125e-23	6.11077e-20	Chr6	20705349	20706997	-	1436	Haem peroxidase
LOC_Os07g34520	6808.15	4144.65	1251.44	33.8527	5.11906	1.96168	4068.08	13.6445	8.22112	6.94954e-21	3.14571e-17	Chr7	20691054	20693694	-	2641	Isocitrate lyase
LOC_Os03g31560	158.28	253.187	410.383	1.8807	4.26588	0	273.95	2.04886	7.01521	7.75438e-20	3.00859e-16	Chr3	18004456	18011507	+	4503	DNA helicase Pif1-like
LOC_Os03g17410	531.14	256.275	329.208	20.6877	22.1826	33.3486	372.208	25.4063	3.87579	2.66e-19	8.02698e-16	Chr3	9680890	9685865	-	3206	-
LOC_Os02g12680	658.614	511.52	111.615	4.70176	1.70635	1.96168	427.25	2.78993	7.26518	5.41115e-19	1.46962e-15	Chr2	6628383	6630103	+	1721	Cytochrome P450
LOC_Os07g26100	762.717	380.81	330.336	0.940352	0	0	491.288	0.313451	10.5366	1.17793e-16	2.90832e-13	Chr7	14973696	14975031	-	1336	-
novel.266	904	312.881	223.23	1.8807	0	0	480.037	0.626901	9.60429	1.52828e-15	3.45888e-12	Chr11	16657047	16657771	+	725	-
LOC_Os12g35470	168.903	147.178	149.948	0	0	0	155.343	0	9.83724	2.23908e-15	4.67777e-12	Chr12	21571461	21572868	-	1084	-
LOC_Os09g26430	197.584	183.2	224.358	1.8807	0	0	201.714	0.626901	8.35659	1.2993e-14	2.52056e-11	Chr9	15974481	15979874	-	4041	-
LOC_Os06g44800	106.228	120.418	144.311	0	0	0	123.652	0	9.50775	3.91989e-14	7.09735e-11	Chr6	27063980	27067208	-	2813	Ribonuclease H-like domain
LOC_Os04g32610	259.196	91.6001	111.615	0	0	0	154.137	0	9.82604	1.44522e-13	2.45318e-10	Chr4	19640798	19642506	-	1055	-
LOC_Os08g43590	95.6052	103.951	102.596	0	0	0	100.717	0	9.21208	2.55368e-13	4.07973e-10	Chr8	27569835	27571984	+	435	-
LOC_Os05g33400	1020.85	697.808	287.494	64.8843	38.3929	30.4061	668.718	44.5611	3.90765	2.91979e-13	4.40548e-10	Chr5	19631962	19633443	+	1482	-
LOC_Os10g20280	77.5464	139.973	113.87	0	0	0	110.463	0	9.3455	3.29459e-13	4.70936e-10	Chr10	10197499	10201059	-	2613	-
LOC_Os04g54759	450.407	418.891	516.361	104.379	135.655	84.3523	461.886	108.129	2.09254	2.10007e-12	2.85179e-09	Chr4	32556873	32565405	-	1280	-
LOC_Os08g07900	60.55	129.681	89.0667	0	0	0	93.0992	0	9.09895	3.74104e-12	4.81406e-09	Chr8	4454559	4460223	-	2793	-
LOC_Os03g10210	3188.96	1045.68	2067.7	203.116	42.6588	90.2373	2100.78	112.004	4.23002	3.8996e-12	4.81406e-09	Chr3	5180655	5182185	-	1291	Homeobox domain-like
LOC_Os05g45160	126.411	47.3439	171.369	0	0	0	115.041	0	9.40328	4.47588e-12	5.28523e-09	Chr5	26218549	26222589	+	3792	Ribonuclease H-like domain
LOC_Os02g08440	654.364	1235.06	635.868	161.741	151.012	107.892	841.764	140.215	2.58544	1.26464e-11	1.37386e-08	Chr2	4542762	4544983	+	2096	WRKY domain
LOC_Os09g20260	490.773	86.4541	33.8228	0	0	0	203.683	0	10.2282	3.46141e-11	3.61571e-08	Chr9	12146399	12148536	-	1177	Amine oxidase
LOC_Os03g28289	46.7403	68.9574	81.1747	1.8807	2.55953	3.92336	65.6241	2.78786	4.5643	7.55796e-11	7.60246e-08	Chr3	16280355	16282155	-	315	-
LOC_Os02g52730	77.5464	219.223	130.781	0.940352	8.53176	0.980841	142.517	3.48432	5.32026	1.13894e-10	1.10473e-07	Chr2	32254049	32257357	-	2213	Nitrite/sulphite reductase 4Fe-4S domain
LOC_Os05g01010	253.885	267.596	240.142	51.7194	58.8691	84.3523	253.874	64.9803	1.9681	6.60512e-10	6.11897e-07	Chr5	33369	36741	+	1758	-
LOC_Os11g07290	54.1763	37.0517	64.2633	0	0	0	51.8304	0	8.25287	6.75906e-10	6.11897e-07	Chr11	3675068	3677298	+	910	-
LOC_Os08g07380	183.774	113.214	165.732	26.3299	11.0913	24.521	154.24	20.6474	2.90717	7.20041e-10	6.30826e-07	Chr8	4132495	4143561	-	5334	NB-ARC
LOC_Os07g09880	73.2973	48.3731	34.9502	0	0	0	52.2069	0	8.26461	1.08885e-09	9.24129e-07	Chr7	5252483	5254134	-	1146	-
LOC_Os08g28710	176.338	172.908	50.7342	12.2246	4.26588	5.88504	133.327	7.4585	4.16537	1.52343e-09	1.25378e-06	Chr8	17558062	17560192	-	2042	Protein kinase domain
LOC_Os08g39730	1136.64	435.358	92.449	31.0316	6.82541	9.80841	554.816	15.8885	5.12793	1.87281e-09	1.49599e-06	Chr8	25155158	25156888	+	1731	Cytochrome P450
LOC_Os01g38110	529.015	806.905	15.784	10.3439	5.97223	4.9042	450.568	7.07344	5.99345	2.48601e-09	1.92907e-06	Chr1	21342129	21344066	-	1938	Cytochrome P450
LOC_Os10g41350	48.8649	37.0517	41.7148	0	0	0	42.5438	0	7.96869	2.82454e-09	2.1167e-06	Chr10	22224672	22227639	+	1562	Harbinger transposase-derived protein
LOC_Os12g26290	1574.3	405.511	118.38	29.1509	15.3572	33.3486	699.396	25.9522	4.75407	2.88368e-09	2.1167e-06	Chr12	15330146	15340505	-	2899	Haem peroxidase
LOC_Os09g36200	1298.11	1445.02	722.68	326.302	247.421	259.923	1155.27	277.882	2.05598	3.68331e-09	2.6325e-06	Chr9	20868717	20871108	-	1536	-
LOC_Os05g32490	38.2421	37.0517	47.3519	0	0	0	40.8819	0	7.91082	4.16823e-09	2.90269e-06	Chr5	18976986	18978186	-	675	-
LOC_Os10g34290	31.8684	39.1102	49.6068	0	0	0	40.1951	0	7.88631	6.50007e-09	4.30574e-06	Chr10	18290636	18294176	+	2469	Reverse transcriptase, RNA-dependent DNA polymerase
LOC_Os01g62140	49.9272	56.6068	78.9198	4.70176	3.4127	0	61.8179	2.70482	4.49555	7.09127e-09	4.58552e-06	Chr1	35972862	35973659	-	708	-
LOC_Os06g09980	223.079	102.922	65.3907	15.0456	5.11906	5.88504	130.464	8.68325	3.91297	1.16037e-08	7.00325e-06	Chr6	5090954	5092121	+	1082	-
LOC_Os08g27550	84.9824	60.7237	73.2827	0	6.82541	1.96168	72.9963	2.92903	4.60548	1.40767e-08	8.31104e-06	Chr8	16801645	16802000	+	210	-
novel.758	89.2315	94.6878	86.8118	6.58247	0	0	90.2437	2.19416	5.37533	1.48796e-08	8.5982e-06	Chr4	27536835	27537486	-	652	-
LOC_Os06g09310	374.985	360.225	310.042	107.2	125.417	74.5439	348.417	102.387	1.76499	1.53729e-08	8.6982e-06	Chr6	4678838	4680332	+	1495	-
LOC_Os08g40680	2228.66	747.21	413.765	150.456	57.1628	72.5822	1129.88	93.4005	3.59705	3.1095e-08	1.68902e-05	Chr8	25758851	25759949	-	1099	Glycoside hydrolase family 18, catalytic domain
LOC_Os01g72270	1429.83	167.762	297.641	24.4492	0.853176	20.5977	631.744	15.3	5.37201	3.53058e-08	1.84398e-05	Chr1	41900002	41901651	-	1650	Cytochrome P450
LOC_Os08g10500	3201.71	1326.66	496.068	199.355	116.885	54.9271	1674.81	123.722	3.75865	3.99982e-08	2.04965e-05	Chr8	6168469	6169041	+	276	-
LOC_Os07g48450	1651.85	1592.2	1055.27	217.221	27.3016	33.3486	1433.1	92.6239	3.95211	5.68271e-08	2.80612e-05	Chr7	28985797	28988032	+	2236	NAC domain
LOC_Os06g14260	129.598	133.798	51.8616	12.2246	4.26588	12.7509	105.086	9.74713	3.44051	5.94131e-08	2.88143e-05	Chr6	7953935	7956231	-	2169	Legume lectin domain
LOC_Os05g11560	441.908	306.706	110.488	46.0773	23.8889	33.3486	286.367	34.4383	3.05757	7.32392e-08	3.42949e-05	Chr5	6539817	6544810	-	1588	Aquaporin-like
LOC_Os03g57640	798.835	310.823	66.5182	20.6877	16.2103	30.4061	392.059	22.4347	4.12926	7.87807e-08	3.62645e-05	Chr3	32851425	32852782	+	1358	Alpha/beta hydrolase fold-3
LOC_Os12g15680	959.239	154.382	22.5485	13.1649	4.26588	2.94252	378.723	6.79111	5.80219	8.12201e-08	3.67643e-05	Chr12	8960777	8964018	+	2018	Multicopper oxidase, type 2
novel.1199	45.678	27.7888	80.0473	1.8807	3.4127	1.96168	51.1714	2.41836	4.38857	9.31039e-08	4.0784e-05	Chr9	12991677	12995710	-	2900	-
LOC_Os04g03164	313.373	295.385	28.1857	14.1053	3.4127	1.96168	212.314	6.49322	5.03284	1.13706e-07	4.9018e-05	Chr4	1320596	1321461	+	591	-
LOC_Os07g35390	137.034	115.272	74.4101	13.1649	21.3294	23.5402	108.905	19.3448	2.49369	1.20054e-07	5.01623e-05	Chr7	21167221	21170686	+	2239	Protein kinase domain
LOC_Os04g58090	627.807	249.07	75.5376	23.5088	28.1548	23.5402	317.472	25.0679	3.66221	1.4139e-07	5.81822e-05	Chr4	34597645	34598781	-	1137	-
LOC_Os04g12960	159.342	108.068	9.01941	0	0.853176	0	92.143	0.284392	8.12238	1.47029e-07	5.95993e-05	Chr4	7153701	7156100	-	1673	UDP-glucuronosyl/UDP-glucosyltransferase
LOC_Os12g42280	351.615	731.772	245.779	70.5264	25.5953	74.5439	443.055	56.8885	2.96369	1.56967e-07	6.25231e-05	Chr12	26268230	26270794	+	2565	Carotenoid oxygenase
LOC_Os04g43090	62.6745	50.4315	27.0582	0.940352	0	0	46.7214	0.313451	7.14302	1.58846e-07	6.25231e-05	Chr4	25518248	25518789	-	542	-
LOC_Os11g03320	19.121	43.227	29.3131	0	0	0	30.5537	0	7.4917	1.86686e-07	7.24316e-05	Chr11	1246704	1248227	+	750	-
LOC_Os01g62190	214.581	82.3372	47.3519	12.2246	7.67858	3.92336	114.757	7.94218	3.85094	1.92448e-07	7.36155e-05	Chr1	36001241	36002103	+	863	Zinc finger C2H2-type
LOC_Os10g28350	314.435	321.115	104.851	30.0913	47.7779	20.5977	246.8	32.8223	2.90765	2.05708e-07	7.75948e-05	Chr10	14751950	14754326	-	943	Acireductone dioxygenase ARD family
LOC_Os05g33130	14657.3	2549.37	630.231	362.036	255.953	170.666	5945.65	262.885	4.49929	2.17234e-07	8.00044e-05	Chr5	19426416	19427875	+	1331	Glycoside hydrolase, family 19, catalytic
LOC_Os10g34920	591.69	58.6653	13.5291	5.64211	0.853176	1.96168	221.295	2.81899	6.30168	2.17988e-07	8.00044e-05	Chr10	18637489	18638521	-	1033	-
LOC_Os08g30510	2017.27	2445.42	536.655	263.299	185.139	275.616	1666.45	241.351	2.7879	2.24669e-07	8.13572e-05	Chr8	18770739	18771329	-	180	-
LOC_Os10g42880	71.1728	54.5484	119.507	0	7.67858	0.980841	81.7428	2.88647	4.78744	3.17189e-07	0.000109119	Chr10	23118121	23126088	-	4380	Ribonuclease H-like domain
LOC_Os07g04560	149.781	158.499	5.63713	0.940352	2.55953	0.980841	104.639	1.49357	6.11263	3.17404e-07	0.000109119	Chr7	2023158	2025061	+	1032	NAC domain
LOC_Os01g33684	1674.15	829.547	1432.96	420.337	418.056	320.735	1312.22	386.376	1.76365	3.31455e-07	0.000112525	Chr1	18531902	18540820	-	4111	NB-ARC
LOC_Os02g26720	444.033	47.3439	73.2827	11.2842	7.67858	1.96168	188.22	6.97483	4.75046	3.75939e-07	0.000126051	Chr2	15697842	15699391	+	1550	Inositol-tetrakisphosphate 1-kinase
LOC_Os08g04580	88.1692	205.843	540.037	30.0913	3.4127	6.86588	278.016	13.4566	4.37142	4.2315e-07	0.00014015	Chr8	2283683	2286209	-	1567	-
LOC_Os10g37660	422.787	443.592	206.319	91.2142	73.3731	102.988	357.566	89.1919	2.00463	5.65062e-07	0.000184898	Chr10	20154546	20159181	-	2050	Glycoside hydrolase, family 37
LOC_Os01g32610	105.166	108.068	95.8312	31.0316	23.0358	13.7318	103.022	22.5997	2.18642	6.35245e-07	0.000205388	Chr1	17881781	17885487	-	2011	-
LOC_Os06g16040	723.413	736.918	1514.13	42.3159	199.643	31.3869	991.488	91.1153	3.4418	6.75891e-07	0.000213448	Chr6	9126536	9129710	-	2105	-
LOC_Os02g53410	312.31	178.054	285.239	77.1089	75.0795	87.2948	258.534	79.8277	1.69561	8.30504e-07	0.000257372	Chr2	32686077	32686828	-	752	-
novel.1114	162.529	34.9933	12.4017	0.940352	0	0	69.9746	0.313451	7.7252	8.3393e-07	0.000257372	Chr8	18420386	18421153	-	685	-
LOC_Os01g58320	345.241	139.973	18.0388	9.40352	2.55953	7.84672	167.751	6.60326	4.67353	8.78996e-07	0.000268232	Chr1	33703402	33703860	+	297	-
LOC_Os05g16420	197.584	43.227	27.0582	4.70176	5.11906	1.96168	89.2898	3.9275	4.49924	9.94986e-07	0.000296954	Chr5	9318022	9318630	+	428	-
LOC_Os09g29310	295.314	287.151	216.466	107.2	58.8691	64.7355	266.31	76.9349	1.79257	1.03089e-06	0.000301837	Chr9	17790438	17792028	-	1591	-
LOC_Os01g52740	283.629	275.83	98.0861	46.0773	15.3572	12.7509	219.182	24.7285	3.14908	1.03357e-06	0.000301837	Chr1	30340015	30341594	-	1076	-
LOC_Os01g24710	51723.5	13352	3466.84	1148.17	1524.63	2325.57	22847.4	1666.12	3.77748	1.07998e-06	0.000312033	Chr1	13903153	13904729	-	1397	-
LOC_Os03g16170	629.932	774.999	1106.01	306.555	296.905	204.996	836.979	269.485	1.63441	1.14008e-06	0.000325932	Chr3	8921370	8923437	-	1872	PPM-type phosphatase domain
LOC_Os01g06740	2178.74	667.961	147.693	106.26	53.7501	41.1953	998.13	67.0684	3.89559	1.18085e-06	0.000333128	Chr1	3188757	3190330	-	1574	Ribosome-inactivating protein
LOC_Os06g44170	627.807	1181.54	413.765	197.474	162.103	151.049	741.037	170.209	2.12246	1.18979e-06	0.000333128	Chr6	26650127	26652370	-	1486	NAD-dependent epimerase/dehydratase
LOC_Os11g47500	8557.73	4571.77	217.593	112.842	27.3016	22.5593	4449.03	54.2344	6.35826	1.37278e-06	0.000380442	Chr11	28723113	28724027	-	915	Glycoside hydrolase family 18, catalytic domain
LOC_Os07g05940	368.611	215.106	119.507	43.2562	10.2381	6.86588	234.408	20.1201	3.54345	1.44887e-06	0.000397474	Chr7	2870686	2872832	+	2147	Carotenoid oxygenase
LOC_Os04g56030	568.32	128.652	27.0582	12.2246	9.38494	13.7318	241.343	11.7804	4.35836	1.51218e-06	0.000410694	Chr4	33374335	33375212	-	800	-
LOC_Os04g49748	683.046	453.884	455.48	210.639	102.381	114.758	530.803	142.593	1.89681	1.58702e-06	0.000425807	Chr4	29660959	29662569	+	1494	-
LOC_Os04g48150	15.9342	17.4967	45.0971	0	0	0	26.176	0	7.26653	1.71818e-06	0.000448693	Chr4	28657556	28662446	-	1875	Reverse transcriptase, RNA-dependent DNA polymerase
LOC_Os05g44770	1484.01	2988.84	917.725	492.745	220.119	222.651	1796.86	311.838	2.52678	1.82822e-06	0.000469863	Chr5	26021574	26025719	-	4042	Serine-threonine/tyrosine-protein kinase, catalytic domain
LOC_Os04g22080	122.162	117.331	5.63713	1.8807	0.853176	2.94252	81.71	1.89213	5.44851	1.88973e-06	0.000479655	Chr4	12500988	12504916	-	1301	Cupin 1
LOC_Os06g25010	162.529	199.668	81.1747	35.7334	31.5675	28.4444	147.79	31.9151	2.21185	1.91412e-06	0.000481347	Chr6	14646977	14648091	-	1115	Glycoside hydrolase family 18, catalytic domain
LOC_Os07g35480	371.798	966.433	777.924	211.579	170.635	125.548	705.385	169.254	2.05902	1.98497e-06	0.000494315	Chr7	21223250	21225911	-	2244	Glycoside hydrolase family 17
LOC_Os10g23130	25.4947	19.5551	19.1662	0	0	0	21.4054	0	6.97797	2.00208e-06	0.000494315	Chr10	12078273	12080274	-	440	Cytochrome P450
LOC_Os10g42040	78.6087	156.441	111.615	23.5088	32.4207	22.5593	115.555	26.1629	2.14035	2.02229e-06	0.000494806	Chr10	22607633	22608702	+	545	-
LOC_Os01g64470	362.237	289.209	146.565	60.1825	32.4207	11.7701	266.004	34.7911	2.93388	2.08386e-06	0.000505317	Chr1	37412000	37413011	-	1012	-
LOC_Os10g22520	848.762	1155.81	751.993	289.628	324.207	142.222	918.855	252.019	1.86568	2.13648e-06	0.000512646	Chr10	11666779	11673599	-	1947	Glycoside hydrolase, family 5
LOC_Os03g52370	2583.46	344.787	94.7038	71.4668	22.1826	38.2528	1007.65	43.9674	4.51906	2.15183e-06	0.000512646	Chr3	30074924	30075741	+	616	-
LOC_Os11g37210	393.044	410.657	18.0388	19.7474	5.11906	12.7509	273.913	12.5391	4.45243	2.25233e-06	0.000531922	Chr11	21986648	21990350	-	931	-
LOC_Os03g24730	565.133	461.088	361.904	195.593	111.766	107.892	462.708	138.417	1.74151	2.40814e-06	0.000563816	Chr3	14094380	14097988	+	3328	Armadillo-type fold
LOC_Os02g32520	1711.33	1990.5	1181.54	715.608	575.041	598.313	1627.79	629.654	1.37048	2.47916e-06	0.000575482	Chr2	19251345	19256303	+	3334	ATPase, AAA-type, core
LOC_Os05g08900	493.96	154.382	383.325	68.6457	82.7581	43.157	343.889	64.8536	2.40505	2.52432e-06	0.000581001	Chr5	4925212	4928175	+	1555	-
LOC_Os04g40990	6845.33	1480.01	515.234	355.453	89.5835	93.1799	2946.86	179.405	4.03801	2.6788e-06	0.000611374	Chr4	24325764	24328254	-	2139	Malate synthase
novel.903	115.789	40.1394	2.25485	0	0	0	52.7276	0	8.27878	2.78409e-06	0.000630109	Chr6	25997240	26001490	+	3817	-
LOC_Os02g48630	1492.5	1683.8	1016.94	622.513	503.374	518.865	1397.75	548.251	1.35041	3.02098e-06	0.000678073	Chr2	29783348	29786105	+	1713	-
LOC_Os03g53900	566.195	807.934	320.189	139.172	58.016	24.521	564.773	73.903	2.93391	3.19106e-06	0.000704602	Chr3	30901299	30903035	-	1568	-
LOC_Os01g19260	376.047	418.891	196.172	78.0492	49.4842	14.7126	330.37	47.4154	2.79967	3.30032e-06	0.00072285	Chr1	10891810	10893810	+	1927	AAA-type ATPase, N-terminal domain
LOC_Os10g35050	524.766	39.1102	13.5291	5.64211	3.4127	0	192.469	3.01827	5.98881	3.55358e-06	0.000772093	Chr10	18701132	18702561	+	1243	Major intrinsic protein
LOC_Os03g21030	2223.35	822.343	829.786	366.737	246.568	207.938	1291.83	273.748	2.23851	3.78578e-06	0.000816017	Chr3	11937436	11939473	-	1804	NAC domain
LOC_Os02g07690	559.822	514.608	205.192	119.425	98.1152	91.2182	426.54	102.919	2.05148	3.87797e-06	0.000829306	Chr2	4008991	4010136	+	1146	-
LOC_Os07g48550	1291.73	1264.91	874.883	398.709	108.353	134.375	1143.84	213.813	2.41982	4.16422e-06	0.000876714	Chr7	29040433	29042297	-	1666	NAC domain
LOC_Os12g39400	268.757	197.609	73.2827	20.6877	6.82541	33.3486	179.883	20.2872	3.15435	4.22412e-06	0.000882483	Chr12	24237164	24238781	-	1618	Zinc finger C2H2-type
LOC_Os01g42380	1348.03	3075.29	526.508	334.765	200.496	207.938	1649.95	247.733	2.73572	4.34164e-06	0.000900112	Chr1	24075065	24082181	-	4916	ABC-2 type transporter
LOC_Os03g51350	2151.12	385.956	155.585	83.6913	74.2263	29.4252	897.552	62.4476	3.84474	4.66468e-06	0.000959758	Chr3	29386200	29388063	+	959	-
LOC_Os06g04220	32.9307	37.0517	25.9308	3.76141	2.55953	2.94252	31.9711	3.08782	3.37717	4.70727e-06	0.000961239	Chr6	1780472	1781052	+	581	-
LOC_Os10g41330	48.8649	118.36	200.682	18.807	17.9167	19.6168	122.635	18.7802	2.70692	5.6405e-06	0.00113474	Chr10	22213115	22214678	+	1470	DNA-binding domain
LOC_Os11g24060	23.3702	38.081	34.9502	1.8807	0	0	32.1338	0.626901	5.70208	5.93963e-06	0.00117757	Chr11	13661554	13663566	+	2013	Xanthine/uracil/vitamin C permease
LOC_Os01g40580	112.602	113.214	56.3713	25.3895	14.504	18.636	94.0622	19.5098	2.27299	6.60229e-06	0.0012808	Chr1	22914582	22916173	-	1195	-
LOC_Os01g11600	346.303	282.005	91.3215	47.958	9.38494	8.82756	239.877	22.0568	3.44452	7.05948e-06	0.00135978	Chr1	6257915	6258264	+	234	-
LOC_Os02g42640	152.968	28.818	30.4405	4.70176	3.4127	0	70.7423	2.70482	4.69758	7.17653e-06	0.00136872	Chr2	25646625	25648091	+	1346	-
LOC_Os12g29950	2783.17	1234.03	287.494	182.428	203.909	77.4864	1434.9	154.608	3.2139	7.20668e-06	0.00136872	Chr12	17900930	17903046	+	2117	-
LOC_Os02g36020	167.84	64.8406	40.5873	9.40352	0.853176	8.82756	91.0894	6.36142	3.85191	7.30613e-06	0.00137013	Chr2	21634966	21645060	-	4830	Terpene synthase, metal-binding domain
LOC_Os02g47650	312.31	244.953	152.203	85.5721	62.2819	56.8888	236.489	68.2476	1.79342	7.97226e-06	0.00147292	Chr2	29113548	29115698	+	513	UspA
LOC_Os01g45250	635.243	349.933	154.457	78.0492	82.7581	59.8313	379.878	73.5462	2.36846	8.21921e-06	0.00150826	Chr1	25681570	25683076	+	1507	-
LOC_Os04g54740	52.0517	59.6945	36.0776	6.58247	11.0913	4.9042	49.2746	7.52599	2.70079	8.4862e-06	0.00153651	Chr4	32552399	32556341	+	3677	-
LOC_Os04g56470	148.719	110.126	76.665	31.972	18.7699	30.4061	111.837	27.0493	2.05178	8.62e-06	0.0015504	Chr4	33661860	33664246	+	1685	-
LOC_Os11g40530	27.6193	57.636	4.50971	0	0	0	29.9217	0	7.46234	9.08219e-06	0.00161145	Chr11	24180905	24181434	+	530	-
LOC_Os01g64360	316.559	262.45	111.615	62.0632	39.2461	20.5977	230.208	40.6357	2.50165	9.19674e-06	0.00161145	Chr1	37358204	37359596	+	1143	Homeobox domain-like
LOC_Os06g45570	647.991	296.414	173.624	92.1545	68.2541	60.8121	372.676	73.7402	2.33756	9.5472e-06	0.00165154	Chr6	27594625	27595564	+	940	-
LOC_Os02g51930	6169.72	1848.47	862.481	584.899	232.064	202.053	2960.22	339.672	3.12355	9.87482e-06	0.00169741	Chr2	31805977	31807891	+	1749	UDP-glucuronosyl/UDP-glucosyltransferase
LOC_Os08g08960	48097.9	101104	7059.94	5104.23	4348.64	503.171	52087.3	3318.68	3.97223	1.0292e-05	0.001747	Chr8	5208385	5209569	+	1011	Cupin 1
LOC_Os03g46060	37327.5	7366.09	2209.76	1198.95	1406.89	189.302	15634.4	931.713	4.06863	1.04097e-05	0.00174812	Chr3	26032940	26033802	-	863	-
LOC_Os01g68420	55.2386	10.2922	32.6954	0	0	0.980841	32.742	0.326947	6.62868	1.04273e-05	0.00174812	Chr1	39762896	39763714	+	819	Transcription factor, MADS-box
LOC_Os01g18860	1031.47	1497.51	1214.24	509.671	350.655	182.436	1247.74	347.588	1.84368	1.05751e-05	0.00175128	Chr1	10657463	10660137	-	1689	S-adenosylmethionine synthetase superfamily
LOC_Os10g39770	564.071	346.846	658.417	185.249	107.5	188.321	523.111	160.357	1.70656	1.0716e-05	0.00175517	Chr10	21271714	21276803	+	3017	-
LOC_Os01g50400	138.096	178.054	142.056	50.779	12.7976	20.5977	152.735	28.0581	2.44739	1.1113e-05	0.00180729	Chr1	28933845	28935210	+	1366	Protein kinase domain
LOC_Os03g52390	12255.5	1299.9	480.284	299.972	367.719	191.264	4678.57	286.318	4.03027	1.13731e-05	0.00183858	Chr3	30078324	30078929	+	503	-
LOC_Os08g31860	513.081	88.5125	43.9696	17.8667	11.0913	19.6168	215.188	16.1916	3.73438	1.1752e-05	0.0018886	Chr8	19747416	19748835	-	1420	-
LOC_Os10g30530	395.168	482.702	408.128	226.625	178.314	158.896	428.666	187.945	1.18962	1.19753e-05	0.00190791	Chr10	15874147	15876706	+	2560	Legume lectin domain
LOC_Os03g52380	1099.46	399.335	223.23	116.604	87.8771	39.2336	574.009	81.2381	2.82038	1.20127e-05	0.00190791	Chr3	30076355	30077045	+	598	-
LOC_Os08g04540	655.427	327.29	3.38228	0.940352	0	1.96168	328.7	0.967344	8.4293	1.23803e-05	0.00195487	Chr8	2256007	2257920	+	1914	Pyridoxal phosphate-dependent decarboxylase
LOC_Os06g15610	46.7403	5.14608	25.9308	0	0	0	25.9391	0	7.25448	1.26404e-05	0.00198439	Chr6	8846791	8847092	-	222	-
LOC_Os05g39720	144.47	55.5776	19.1662	6.58247	6.82541	2.94252	73.0713	5.45013	3.73967	1.34938e-05	0.00205899	Chr5	23310474	23313449	-	2273	WRKY domain
LOC_Os04g28580	22.3079	60.7237	22.5485	2.82106	1.70635	0	35.1934	1.50914	4.52999	1.34946e-05	0.00205899	Chr4	16919612	16923579	+	2674	-
LOC_Os07g07930	1474.44	792.496	302.15	216.281	118.591	124.567	856.364	153.146	2.48357	1.40057e-05	0.0021165	Chr7	3980211	3981284	+	974	-
LOC_Os05g01570	337.805	254.216	184.898	100.618	46.9247	68.6588	258.973	72.0671	1.84708	1.40769e-05	0.0021165	Chr5	338846	340879	+	1540	EamA domain
LOC_Os01g18530	100.917	7.20451	6.76456	0	0	0	38.2952	0	7.81724	1.4682e-05	0.00219093	Chr1	10431473	10432723	-	399	-
ChrSy.fgenesh.gene.82	25.4947	374.634	546.802	37.6141	9.38494	11.7701	315.644	19.5897	4.01115	1.5345e-05	0.00226498	ChrSy	558985	561654	+	1143	CAAX amino terminal protease
LOC_Os07g36544	1011.29	882.037	488.176	314.078	251.687	184.398	793.835	250.054	1.66656	1.54877e-05	0.00227367	Chr7	21846326	21851297	-	3033	Serine-threonine/tyrosine-protein kinase, catalytic domain
LOC_Os03g60560	198.646	66.899	67.6456	21.6281	18.7699	15.6934	111.064	18.6971	2.57009	1.59159e-05	0.00232397	Chr3	34424180	34425104	+	925	-
LOC_Os09g19380	52.0517	2.05843	45.0971	0	0	0	33.0691	0	7.60468	1.61029e-05	0.00233871	Chr9	11602220	11604383	-	801	Protein kinase domain
LOC_Os02g17930	52.0517	15.4382	18.0388	0.940352	0	0	28.5096	0.313451	6.42973	1.64628e-05	0.00236568	Chr2	10382367	10384765	-	1743	-
LOC_Os05g50100	315.497	674.136	136.419	77.1089	51.1906	71.6014	375.351	66.6336	2.49496	1.67265e-05	0.00239092	Chr5	28710320	28711241	-	922	-
LOC_Os01g37580	27.6193	30.8765	48.4793	2.82106	5.97223	3.92336	35.6584	4.23888	3.06142	1.72406e-05	0.0024515	Chr1	21010563	21022694	+	5799	DNA helicase Pif1-like
LOC_Os06g35700	35.0552	86.4541	1.12743	0	0	0	40.8789	0	7.91199	1.78675e-05	0.00251624	Chr6	20832432	20834494	-	2063	FAD-binding, type 2
LOC_Os12g15780	685.171	363.313	396.854	200.295	135.655	129.471	481.779	155.14	1.63496	1.78811e-05	0.00251624	Chr12	9005662	9009884	+	3660	Ribonuclease H-like domain
LOC_Os11g42200	1145.14	613.412	6.76456	0	1.70635	4.9042	588.438	2.20352	8.0664	1.80232e-05	0.00252315	Chr11	25423701	25426214	+	2234	Multicopper oxidase, type 3
LOC_Os06g11450	570.444	728.684	248.034	158.92	136.508	115.739	515.721	137.056	1.912	1.84495e-05	0.00256959	Chr6	6058726	6060541	-	1816	-
LOC_Os11g47530	122.162	17.4967	24.8034	3.76141	0	0.980841	54.8207	1.58075	5.13366	1.89154e-05	0.00260774	Chr11	28733117	28734280	+	1164	Glycoside hydrolase family 18, catalytic domain
LOC_Os01g60930	195.46	142.032	76.665	40.4351	27.3016	32.3677	138.052	33.3682	2.05054	1.94986e-05	0.00265606	Chr1	35243884	35246808	+	1759	-
LOC_Os08g42570	188.024	76.1619	23.676	10.3439	10.2381	7.84672	95.9538	9.47624	3.33902	1.95199e-05	0.00265606	Chr8	26904987	26906611	+	1625	-
LOC_Os07g42740	214.581	160.558	108.233	54.5404	46.9247	51.0037	161.124	50.8229	1.66578	2.05357e-05	0.00277477	Chr7	25591228	25592810	+	1583	-
LOC_Os01g01430	83.9201	32.9349	1.12743	0	0	0	39.3275	0	7.85585	2.14472e-05	0.00285732	Chr1	216126	217664	+	1425	NAC domain
LOC_Os08g02230	244.324	247.012	5.63713	10.3439	1.70635	7.84672	165.658	6.63232	4.64853	2.14623e-05	0.00285732	Chr8	767546	770917	-	3014	FAD-binding, type 2
LOC_Os01g14440	3234.64	2629.64	1244.68	679.875	871.946	528.673	2369.66	693.498	1.77259	2.21434e-05	0.00290528	Chr1	8084372	8087044	+	2114	WRKY domain
LOC_Os06g44010	22.3079	187.317	9.01941	0.940352	0.853176	3.92336	72.8815	1.90563	5.27523	2.28464e-05	0.0029831	Chr6	26509919	26511699	-	1593	WRKY domain
LOC_Os01g70110	2381.63	2420.71	1434.09	889.573	883.037	899.431	2078.81	890.68	1.22289	2.34576e-05	0.00301936	Chr1	40572819	40574020	+	1109	NAC domain
LOC_Os02g07010	550.261	366.401	454.353	204.056	220.119	190.283	457.005	204.82	1.15733	2.35919e-05	0.00302233	Chr2	3580317	3581779	+	1463	-
LOC_Os01g11650	1590.23	1976.09	1153.36	772.029	540.06	575.753	1573.23	629.281	1.32216	2.37085e-05	0.003023	Chr1	6278493	6283652	+	3600	GDSL lipase/esterase
LOC_Os11g05840	33.993	57.636	41.7148	10.3439	5.11906	6.86588	44.4479	7.44294	2.58389	2.41617e-05	0.0030664	Chr11	2713009	2724275	-	7244	Reverse transcriptase, RNA-dependent DNA polymerase
LOC_Os01g50160	1310.85	1449.13	860.226	499.327	525.556	546.328	1206.74	523.737	1.20439	2.48249e-05	0.00312031	Chr1	28825745	28832656	+	4082	ABC transporter type 1, transmembrane domain
LOC_Os03g08940	703.229	626.792	482.538	242.611	284.961	158.896	604.187	228.823	1.40003	2.63558e-05	0.00326847	Chr3	4635138	4636315	+	555	-
LOC_Os02g33340	1745.33	1431.64	2954.98	495.566	126.27	36.2911	2043.98	219.376	3.2199	2.77084e-05	0.00334459	Chr2	19807922	19811946	+	3102	Reverse transcriptase, RNA-dependent DNA polymerase
LOC_Os01g36294	239.013	36.0225	5.63713	2.82106	3.4127	0	93.5576	2.07792	5.47767	2.89467e-05	0.00346327	Chr1	20124194	20126856	+	1762	Cytochrome P450
novel.693	451.469	117.331	64.2633	36.6737	17.9167	18.636	211.021	24.4088	3.11274	2.96892e-05	0.00353653	Chr4	31160843	31163658	+	1441	-
LOC_Os12g43870	215.643	294.356	40.5873	30.0913	18.7699	25.5019	183.529	24.7877	2.89007	3.06548e-05	0.00363561	Chr12	27239013	27239339	+	327	-
LOC_Os07g12800	2208.48	1099.2	998.9	527.538	486.31	354.083	1435.53	455.977	1.65445	3.12068e-05	0.00368498	Chr7	7321536	7323790	+	2181	-
LOC_Os07g05365	346.303	153.353	90.1941	31.0316	2.55953	23.5402	196.617	19.0438	3.37252	3.16787e-05	0.00369766	Chr7	2456968	2458151	+	654	Photosystem II PsbR
LOC_Os11g47600	570.444	83.3664	59.7536	23.5088	3.4127	20.5977	237.855	15.8397	3.91226	3.17226e-05	0.00369766	Chr11	28758715	28760007	-	1293	Glycoside hydrolase family 18, catalytic domain
LOC_Os04g12970	327.182	185.259	42.8422	30.0913	3.4127	4.9042	185.094	12.8027	3.85623	3.24249e-05	0.00376337	Chr4	7156820	7159820	-	1841	UDP-glucuronosyl/UDP-glucosyltransferase
LOC_Os01g03390	76763.5	15294.1	8147.91	5740.85	2793.3	1103.45	33401.9	3212.53	3.37813	3.36673e-05	0.00389093	Chr1	1365508	1366503	-	996	Proteinase inhibitor I12, Bowman-Birk
LOC_Os10g25290	718.101	906.739	204.064	173.025	90.4367	76.5056	609.635	113.322	2.42778	3.51496e-05	0.00400186	Chr10	13069729	13070894	-	965	-
LOC_Os08g35630	1399.02	395.219	236.76	152.337	76.7858	54.9271	677	94.6833	2.83802	3.51715e-05	0.00400186	Chr8	22462394	22464896	+	1062	-
LOC_Os08g10100	15.9342	38.081	68.773	4.70176	3.4127	0.980841	40.9294	3.03177	3.74555	3.52165e-05	0.00400186	Chr8	5864931	5865851	-	921	-
LOC_Os02g39330	509.894	854.249	87.9393	63.944	13.6508	67.678	484.027	48.4243	3.32311	3.54616e-05	0.00401292	Chr2	23742941	23744109	-	1080	Glycoside hydrolase, family 19, catalytic
LOC_Os05g28040	43.5535	76.1619	37.2051	5.64211	12.7976	6.86588	52.3068	8.43521	2.62478	3.60969e-05	0.00403459	Chr5	16362685	16364011	-	1327	-
LOC_Os01g72530	391.981	127.623	241.269	48.8983	81.9049	45.1187	253.624	58.6406	2.11073	3.65162e-05	0.00406452	Chr1	42073984	42074982	-	999	EF-hand domain
LOC_Os05g27350	318.684	56.6068	19.1662	9.40352	2.55953	10.7892	131.486	7.5841	4.12216	3.68998e-05	0.00409046	Chr5	15894885	15896386	-	1502	-
LOC_Os05g45070	71.1728	192.463	16.9114	8.46317	7.67858	8.82756	93.5158	8.32311	3.49191	3.97584e-05	0.00435071	Chr5	26189646	26190616	-	971	-
LOC_Os07g24830	645.866	28.818	71.0279	12.2246	21.3294	2.94252	248.571	12.1655	4.34832	3.99891e-05	0.00435071	Chr7	14118021	14118923	+	661	-
LOC_Os03g19290	600.188	510.491	264.945	183.369	81.9049	102.007	458.541	122.427	1.9059	4.00486e-05	0.00435071	Chr3	10848474	10850026	+	1064	-
LOC_Os04g56040	125.349	76.1619	13.5291	9.40352	3.4127	3.92336	71.68	5.57986	3.68696	4.03894e-05	0.00437026	Chr4	33377338	33378405	-	663	-
LOC_Os06g44250	59.4877	120.418	32.6954	15.0456	5.11906	6.86588	70.8671	9.01019	2.98029	4.08662e-05	0.00440431	Chr6	26693487	26696433	-	1441	AdipoR/Haemolysin-III-related
LOC_Os01g20206	130.66	316.998	43.9696	15.0456	29.008	5.88504	163.876	16.6462	3.29453	4.30068e-05	0.00459851	Chr1	11505077	11506103	-	804	Methyltransferase type 11
LOC_Os02g09810	2881.97	813.08	558.076	343.229	216.707	149.088	1417.71	236.341	2.58459	4.38827e-05	0.00467377	Chr2	5058716	5061965	-	1877	-
LOC_Os04g10750	222.017	157.47	148.82	75.2282	52.8969	35.3103	176.102	54.4785	1.69202	4.48088e-05	0.00474046	Chr4	5846276	5849390	+	3115	Major facilitator, sugar transporter-like
LOC_Os12g41560	330.369	222.31	289.749	132.59	118.591	90.2373	280.809	113.806	1.30213	4.516e-05	0.00475388	Chr12	25727713	25729368	+	1570	-
LOC_Os12g05540	794.585	208.931	51.8616	50.779	6.82541	9.80841	351.793	22.4709	3.96983	4.6966e-05	0.00490516	Chr12	2535821	2539020	+	1803	Purple acid phosphatase-like, N-terminal
LOC_Os01g73040	299.563	277.888	252.543	150.456	123.711	131.433	276.665	135.2	1.03374	4.91972e-05	0.00509979	Chr1	42377194	42381600	+	2110	PB1 domain
LOC_Os08g14950	45.678	18.5259	39.4599	4.70176	0.853176	3.92336	34.5546	3.15943	3.46786	4.97786e-05	0.00514045	Chr8	9016956	9020344	+	3169	Serine-threonine/tyrosine-protein kinase, catalytic domain
LOC_Os01g64520	2369.95	1729.08	1420.56	742.878	932.521	771.922	1839.86	815.774	1.17327	5.01904e-05	0.00514386	Chr1	37440429	37444871	-	1649	Uricase
LOC_Os09g34230	247.511	96.7462	87.9393	30.0913	5.11906	23.5402	144.066	19.5835	2.88382	5.12738e-05	0.00523514	Chr9	20214376	20216181	+	1731	UDP-glucuronosyl/UDP-glucosyltransferase
novel.118	199.709	94.6878	119.507	34.793	3.4127	9.80841	137.968	16.0047	3.11133	5.22887e-05	0.00529858	Chr1	23915321	23919114	-	2124	PF04434:SWIM zinc finger
LOC_Os02g21920	2482.55	1731.14	2546.86	945.054	1235.4	956.32	2253.51	1045.59	1.10763	5.24805e-05	0.00529858	Chr2	13039013	13040263	+	1153	-
LOC_Os12g40260	347.366	184.23	119.507	37.6141	71.6668	29.4252	217.034	46.2354	2.22823	5.35981e-05	0.00539138	Chr12	24915510	24917030	+	1521	WD40-repeat-containing domain
LOC_Os01g62130	339.93	163.645	69.9004	47.958	24.7421	22.5593	191.158	31.7531	2.5905	5.44074e-05	0.00542815	Chr1	35965949	35966946	-	998	Zinc finger C2H2-type
LOC_Os09g10010	80.7333	79.2496	58.6262	22.5685	22.1826	24.521	72.8697	23.0907	1.65987	5.47632e-05	0.00542815	Chr9	5454023	5455007	+	613	-
LOC_Os07g01560	2994.57	864.541	240.142	203.116	137.361	182.436	1366.42	174.305	2.97089	5.58869e-05	0.00549939	Chr7	348475	353686	-	2712	Major facilitator, sugar transporter-like
ChrSy.fgenesh.gene.47	245.387	91.6001	15.784	9.40352	13.6508	4.9042	117.59	9.31951	3.65292	5.77856e-05	0.00564532	ChrSy	320295	320612	+	318	-
LOC_Os01g66250	147.657	24.7012	3.38228	0	1.70635	0	58.5801	0.568784	6.62307	5.85887e-05	0.00564922	Chr1	38481235	38484007	+	2773	Protein kinase domain
LOC_Os02g22160	190.148	309.794	62.0084	45.1369	25.5953	13.7318	187.317	28.1547	2.73393	5.85957e-05	0.00564922	Chr2	13200794	13203753	+	1756	Glycosyl transferase, family 14
LOC_Os02g12380	385.608	215.106	206.319	57.3615	81.9049	16.6743	269.011	51.9802	2.3689	5.8621e-05	0.00564922	Chr2	6447078	6453173	+	2252	Histone deacetylase domain
novel.1031	145.532	46.3147	77.7924	6.58247	23.0358	10.7892	89.8798	13.4692	2.73129	5.91497e-05	0.00564922	Chr7	23215152	23216619	-	1468	-
LOC_Os07g06850	960.301	120.418	14.6565	31.972	7.67858	8.82756	365.125	16.1594	4.49888	5.93624e-05	0.00564922	Chr7	3344780	3346557	-	1778	Alpha/beta hydrolase fold-3
novel.405	488.649	311.852	211.956	44.1966	119.445	91.2182	337.486	84.9531	1.98925	5.93885e-05	0.00564922	Chr12	20843969	20846219	-	1081	-
LOC_Os08g43120	1359.72	1390.47	788.071	483.341	318.235	153.011	1179.42	318.196	1.88996	5.94896e-05	0.00564922	Chr8	27268083	27277540	+	4226	ABC-2 type transporter
LOC_Os08g40690	152.968	57.636	62.0084	21.6281	14.504	19.6168	90.8709	18.583	2.29223	6.33852e-05	0.00591108	Chr8	25762457	25763824	+	1368	Glycoside hydrolase family 18, catalytic domain
LOC_Os11g47570	387.732	7.20451	98.0861	11.2842	5.97223	9.80841	164.341	9.02162	4.18924	6.4477e-05	0.00595623	Chr11	28748076	28749262	+	1187	Glycoside hydrolase family 18, catalytic domain
LOC_Os06g20790	135.972	365.371	15.784	12.2246	14.504	16.6743	172.376	14.4676	3.57546	6.47544e-05	0.00596158	Chr6	11984848	11992872	-	1682	SAM dependent carboxyl methyltransferase
LOC_Os10g28080	1758.07	4020.11	403.619	464.534	145.893	144.184	2060.6	251.537	3.03435	6.59017e-05	0.00602767	Chr10	14589926	14591220	+	1295	Glycoside hydrolase family 18, catalytic domain
LOC_Os07g40630	547.074	534.163	374.306	224.744	128.83	211.862	485.181	188.478	1.36531	6.88701e-05	0.00625566	Chr7	24347897	24351927	-	3947	Protein kinase domain
LOC_Os02g10550	158.28	73.0743	21.4211	14.1053	2.55953	3.92336	84.2584	6.86272	3.62252	6.94646e-05	0.00628863	Chr2	5554686	5556179	+	1494	NB-ARC
LOC_Os01g65380	2056.57	1474.87	1471.29	819.987	635.616	375.662	1667.58	610.422	1.44973	7.09123e-05	0.00639836	Chr1	37948867	37952032	+	2534	GOLD domain
LOC_Os12g12080	200.771	5.14608	31.5679	3.76141	1.70635	3.92336	79.1616	3.13037	4.66729	7.21072e-05	0.00648463	Chr12	6610814	6624708	+	1051	-
LOC_Os09g15480	299.563	314.94	38.3325	16.9263	15.3572	44.1378	217.612	25.4738	3.09769	7.35432e-05	0.00657962	Chr9	9476395	9478845	-	1194	-
LOC_Os03g32230	44.6158	28.818	14.6565	2.82106	0	0	29.3634	0.940352	4.98214	7.3648e-05	0.00657962	Chr3	18435989	18437090	-	1102	Zinc finger C2H2-type
LOC_Os01g72170	875.319	498.14	341.61	127.888	223.532	89.2565	571.69	146.892	1.95946	7.60245e-05	0.00672557	Chr1	41853850	41854883	+	1034	Glutathione S-transferase, N-terminal
LOC_Os01g62540	20.1833	12.3506	10.1468	0	0	0	14.2269	0	6.38899	7.82416e-05	0.0068578	Chr1	36214333	36216515	+	939	-
LOC_Os11g36110	12.7474	24.7012	19.1662	0	0.853176	0	18.8716	0.284392	5.83466	7.93265e-05	0.00689162	Chr11	21227199	21232286	+	3402	Reverse transcriptase, RNA-dependent DNA polymerase
LOC_Os01g52340	171.027	114.243	54.1165	32.9123	19.623	12.7509	113.129	21.7621	2.37804	7.94304e-05	0.00689162	Chr1	30079649	30081500	+	1852	-
LOC_Os01g06640	487.587	138.944	164.604	66.765	46.9247	59.8313	263.712	57.8403	2.18954	8.03672e-05	0.00692083	Chr1	3128992	3130722	+	1731	-
LOC_Os04g41970	218.83	201.726	235.632	110.021	104.941	75.5247	218.729	96.8289	1.17415	8.05252e-05	0.00692083	Chr4	24863964	24867824	-	2407	Six-hairpin glycosidase-like
LOC_Os12g16720	1146.2	2268.39	662.927	445.727	354.068	334.467	1359.17	378.087	1.84607	8.10752e-05	0.00692131	Chr12	9579747	9582014	-	2172	Cytochrome P450
LOC_Os04g49980	770.153	173.937	25.9308	34.793	25.5953	10.7892	323.34	23.7259	3.76775	8.11261e-05	0.00692131	Chr4	29811954	29812728	+	775	Late embryogenesis abundant protein, LEA-25/LEA-D113
LOC_Os06g39020	6.37368	56.6068	18.0388	0.940352	0	0	27.0064	0.313451	6.3525	8.32782e-05	0.00699979	Chr6	23165707	23170272	-	4269	Ribonuclease H-like domain
LOC_Os08g01530	94.5429	153.353	31.5679	17.8667	8.53176	16.6743	93.1546	14.3576	2.70272	8.71728e-05	0.0072847	Chr8	321888	323000	-	1113	-
LOC_Os05g04700	12237.5	6006.5	4595.39	3094.7	1570.7	1927.35	7613.12	2197.58	1.79261	8.83969e-05	0.00734181	Chr5	2219901	2220462	-	279	-
LOC_Os05g49940	985.796	388.014	102.596	81.8106	12.7976	61.793	492.135	52.1337	3.2402	9.04227e-05	0.00748717	Chr5	28647465	28648244	+	780	-
LOC_Os03g20310	2158.55	1609.69	1531.04	1013.7	703.017	760.151	1766.43	825.623	1.09741	9.17947e-05	0.00757767	Chr3	11475898	11481266	-	2063	Transcription factor TGA like domain
LOC_Os04g13210	459.967	988.047	298.768	201.235	96.4089	129.471	582.261	142.372	2.03265	9.60857e-05	0.00790785	Chr4	7301573	7312295	-	4082	ABC transporter type 1, transmembrane domain
LOC_Os07g35510	2484.67	1646.74	499.45	468.295	255.1	285.425	1543.62	336.273	2.19877	9.86603e-05	0.00807083	Chr7	21238269	21241263	-	2395	Glycoside hydrolase family 17
LOC_Os02g17400	179.525	372.576	243.524	63.0036	58.016	115.739	265.208	78.9196	1.75062	0.000101247	0.00815688	Chr2	10010588	10013470	-	2883	Leucine-rich repeat
LOC_Os07g33780	1887.67	4926.85	784.689	509.671	414.644	592.428	2533.07	505.581	2.32501	0.000101438	0.00815688	Chr7	20214025	20218702	+	1971	ABC-2 type transporter
novel.483	150.844	38.081	4.50971	0.940352	1.70635	4.9042	64.4781	2.51697	4.68983	0.000103857	0.00829719	Chr2	6219512	6220411	-	599	-
LOC_Os11g47870	382.421	440.504	91.3215	75.2282	41.8056	65.7163	304.749	60.9167	2.324	0.000103871	0.00829719	Chr11	28870096	28872571	+	2476	-
LOC_Os10g09240	345.241	905.709	461.117	206.877	73.3731	47.0803	570.689	109.11	2.3871	0.000107254	0.00841777	Chr10	4994498	4995160	-	663	-
LOC_Os03g55420	799.897	780.145	1484.82	411.874	243.155	413.915	1021.62	356.315	1.51989	0.000107281	0.00841777	Chr3	31530776	31533526	+	1426	Haem peroxidase
LOC_Os06g49970	623.558	1461.49	197.3	190.892	66.5477	99.0649	760.781	118.835	2.67904	0.000107664	0.00841777	Chr6	30262778	30266915	+	1985	Alpha-amylase, C-terminal beta-sheet
LOC_Os06g33970	121.1	60.7237	15.784	7.52282	4.26588	0	65.8692	3.92957	4.06129	0.000107993	0.00841777	Chr6	19780911	19781815	+	905	-
LOC_Os01g53090	646.929	599.003	885.03	358.274	142.48	200.091	710.32	233.615	1.60468	0.000108324	0.00841777	Chr1	30512276	30521565	-	1061	-
LOC_Os04g44300	215.643	134.827	109.36	58.3018	37.5397	51.9845	153.277	49.2754	1.63925	0.000108426	0.00841777	Chr4	26236216	26240651	-	2924	Oligopeptide transporter, OPT superfamily
LOC_Os05g47770	427.037	308.765	189.408	129.769	69.9604	90.2373	308.403	96.6555	1.67497	0.00010848	0.00841777	Chr5	27360906	27367545	+	2356	Serine-threonine/tyrosine-protein kinase, catalytic domain
LOC_Os09g20090	57.3631	81.308	92.449	28.2106	9.38494	11.7701	77.04	16.4552	2.22972	0.000113989	0.00872067	Chr9	12029912	12035268	-	2309	Multicopper oxidase, type 1
LOC_Os09g29920	27.6193	18.5259	10.1468	0	0	0.980841	18.764	0.326947	5.82713	0.000116524	0.00886464	Chr9	18188918	18194979	+	5841	-
LOC_Os05g02450	1829.25	604.149	678.711	303.734	325.913	220.689	1037.37	283.445	1.87159	0.000118756	0.00900921	Chr5	835594	838452	+	2770	-
LOC_Os05g33644	506.708	333.466	158.967	119.425	50.3374	71.6014	333.047	80.4545	2.05053	0.00012003	0.00908046	Chr5	19794800	19805637	-	2700	-
LOC_Os03g10300	88.1692	30.8765	10.1468	0.940352	4.26588	2.94252	43.0642	2.71625	3.97854	0.000121132	0.0091033	Chr3	5253474	5254816	+	1243	AdipoR/Haemolysin-III-related
LOC_Os05g08910	2233.97	307.735	456.608	103.439	226.945	99.0649	999.439	143.149	2.80306	0.000121337	0.0091033	Chr5	4934567	4935229	-	663	-
LOC_Os05g50390	104.103	82.3372	34.9502	9.40352	0	0	73.797	3.13451	4.56396	0.000134636	0.00996341	Chr5	28880514	28881393	-	880	-
LOC_Os11g47840	393.044	299.502	95.8312	57.3615	71.6668	60.8121	262.792	63.2801	2.05404	0.00013634	0.0100515	Chr11	28853507	28857521	-	1611	Peptidase S54, rhomboid domain
LOC_Os08g08420	91.3561	30.8765	57.4987	14.1053	11.0913	4.9042	59.9104	10.0336	2.57372	0.000136567	0.0100515	Chr8	4848761	4849722	-	717	-
LOC_Os03g12890	3930.44	2460.85	767.777	731.594	197.084	381.547	2386.36	436.742	2.45014	0.000137079	0.0100591	Chr3	6947995	6951344	+	2595	Aminotransferase class IV
LOC_Os07g03020	135.972	101.892	36.0776	18.807	5.11906	0.980841	91.3139	8.30231	3.45953	0.00013741	0.0100591	Chr7	1133505	1135075	+	1437	-
LOC_Os05g45410	109.415	80.2788	18.0388	5.64211	12.7976	7.84672	69.2441	8.76216	2.97822	0.0001386	0.0101137	Chr5	26344414	26346889	+	1996	Heat shock factor (HSF)-type, DNA-binding
LOC_Os05g03920	1140.89	435.358	84.557	112.842	21.3294	28.4444	553.601	54.2053	3.35294	0.0001389	0.0101137	Chr5	1752388	1755729	+	2323	Serine-threonine/tyrosine-protein kinase, catalytic domain
novel.923	40.3666	27.7888	6.76456	0	0.853176	0.980841	24.9733	0.611339	5.34903	0.000139658	0.0101416	Chr6	5518910	5519782	-	801	-
LOC_Os06g05410	28.6816	12.3506	25.9308	1.8807	1.70635	0	22.321	1.19569	4.19692	0.000143142	0.0103669	Chr6	2441870	2442537	-	372	-
LOC_Os11g33270	1723.02	1008.63	3524.33	566.092	599.783	182.436	2085.33	449.437	2.21379	0.000145173	0.010486	Chr11	19675011	19678096	+	1257	Glycoside hydrolase family 16
LOC_Os06g47470	357.988	154.382	77.7924	52.6597	36.6866	21.5785	196.721	36.9749	2.41112	0.000151847	0.0108813	Chr6	28752549	28757410	-	1740	Protein kinase domain
LOC_Os03g08470	8198.68	3046.48	1815.16	1052.25	1272.94	632.642	4353.44	985.945	2.1425	0.000154167	0.0109895	Chr3	4348670	4350541	-	1763	DNA-binding domain
LOC_Os04g25650	36.1175	65.8698	36.0776	8.46317	7.67858	12.7509	46.0216	9.63089	2.26316	0.000155136	0.0110153	Chr4	14863453	14864827	-	1375	-
LOC_Os01g44120	73.2973	17.4967	6.76456	0	1.70635	0.980841	32.5195	0.895731	5.16048	0.000159025	0.0112133	Chr1	25288288	25289160	+	873	-
LOC_Os08g19694	12.7474	41.1686	20.2937	0.940352	2.55953	1.96168	24.7365	1.82052	3.75628	0.000159371	0.0112133	Chr8	11785529	11798467	-	3636	NB-ARC
LOC_Os10g02070	149.781	34.9933	40.5873	11.2842	2.55953	0	75.1207	4.61458	4.02499	0.000162923	0.0114336	Chr10	677086	678882	-	1285	Haem peroxidase
LOC_Os12g07030	47.8026	30.8765	14.6565	3.76141	4.26588	0.980841	31.1119	3.00271	3.36008	0.000165425	0.0115339	Chr12	3437308	3440088	-	1607	-
LOC_Os08g08440	958.177	890.271	417.148	340.408	191.111	211.862	755.198	247.793	1.60809	0.000166475	0.0115339	Chr8	4858042	4859104	-	966	-
LOC_Os10g09850	1931.23	504.315	643.76	320.66	144.187	67.678	1026.43	177.508	2.53162	0.000167386	0.0115381	Chr10	5325563	5329971	-	1643	-
LOC_Os05g21180	639.493	911.885	399.109	301.853	180.02	165.762	650.162	215.878	1.59089	0.00016992	0.011654	Chr5	12453243	12457796	+	2277	Sphingomyelin synthase-like domain
LOC_Os08g31850	594.877	174.967	65.3907	23.5088	18.7699	61.793	278.411	34.6905	3.00685	0.000170805	0.0116849	Chr8	19745526	19747077	+	1552	-
LOC_Os10g34930	3153.91	5465.13	629.104	725.012	131.389	75.5247	3082.72	310.642	3.31095	0.00017134	0.011692	Chr10	18640397	18641937	+	911	-
LOC_Os03g56160	892.315	824.401	651.652	446.667	313.116	235.402	789.456	331.728	1.25083	0.000173508	0.0118103	Chr3	32008400	32010658	+	2259	Legume lectin domain
LOC_Os03g48760	79.671	8.23372	1.12743	0	0	0	29.6774	0	7.44953	0.000174826	0.0118703	Chr3	27783892	27784581	-	690	Cupin 1
LOC_Os03g10100	352.677	1136.25	81.1747	87.4528	33.2739	5.88504	523.368	42.2039	3.63223	0.000179824	0.0120768	Chr3	5112102	5114453	+	2256	Major facilitator, sugar transporter-like
LOC_Os03g17350	71.1728	124.535	3.38228	2.82106	5.97223	1.96168	66.3634	3.58499	4.20124	0.000181709	0.0121553	Chr3	9654330	9657056	+	2727	ABC-2 type transporter
LOC_Os07g29760	27.6193	50.4315	39.4599	7.52282	10.2381	4.9042	39.1702	7.55504	2.36616	0.000182879	0.0122035	Chr7	17496502	17498225	+	1638	Peptidase C1A, papain C-terminal
LOC_Os05g46490	1622.1	1337.98	1372.08	921.545	719.227	742.496	1444.05	794.423	0.86224	0.000184067	0.0122081	Chr5	26930480	26935873	+	1924	JAB1/MPN/MOV34 metalloenzyme domain
LOC_Os02g50350	2147.93	2740.8	907.578	566.092	667.184	679.722	1932.1	637.666	1.59938	0.000184529	0.0122081	Chr2	30745336	30749371	-	1915	Dihydroorotate dehydrogenase domain
LOC_Os03g55010	836.014	548.572	501.705	271.762	320.794	231.478	628.764	274.678	1.19437	0.000185197	0.0122081	Chr3	31281994	31284676	+	1594	UDP-glucuronosyl/UDP-glucosyltransferase
LOC_Os03g53200	413.227	259.362	133.036	90.2738	56.3096	82.3906	268.542	76.3247	1.8162	0.000200294	0.0131079	Chr3	30517536	30520559	+	1761	EF-hand domain
LOC_Os04g55100	3.18684	122.477	82.3021	3.76141	4.26588	0	69.3219	2.67576	4.68285	0.000201646	0.0131623	Chr4	32764819	32766366	+	547	-
LOC_Os02g36030	70.1105	581.507	13.5291	17.8667	17.9167	8.82756	221.715	14.8703	3.89717	0.000202094	0.0131623	Chr2	21662608	21664323	+	1716	Cytochrome P450
LOC_Os06g39110	3329.19	834.693	217.593	269.881	67.4009	165.762	1460.49	167.681	3.12297	0.000202974	0.013188	Chr6	23227135	23228392	+	844	-
LOC_Os09g25770	1201.44	907.768	499.45	352.632	219.266	100.046	869.552	223.981	1.95675	0.000204849	0.0132373	Chr9	15447549	15450012	-	1627	EamA domain
LOC_Os01g09990	210.331	379.78	15.784	31.972	9.38494	13.7318	201.965	18.3629	3.46091	0.000205196	0.0132373	Chr1	5201862	5204046	+	1799	Myc-type, basic helix-loop-helix (bHLH) domain
LOC_Os01g50370	97.7298	121.447	77.7924	39.4948	11.0913	19.6168	98.9899	23.401	2.0846	0.000205952	0.0132536	Chr1	28921498	28923085	+	1588	Protein kinase domain
novel.519	37.1798	50.4315	16.9114	6.58247	0.853176	2.94252	34.8409	3.45939	3.34585	0.000207628	0.0132723	Chr2	33417680	33420350	-	2129	-
novel.977	73.2973	101.892	77.7924	34.793	23.0358	13.7318	84.3273	23.8535	1.82072	0.000208062	0.0132723	Chr7	15257021	15259065	+	2045	-
LOC_Os01g42410	729.786	518.724	156.712	123.186	95.5557	126.528	468.408	115.09	2.02559	0.000208181	0.0132723	Chr1	24107080	24115143	-	4616	ABC-2 type transporter
LOC_Os04g33240	1437.26	516.666	192.79	195.593	52.0437	51.9845	715.574	99.8739	2.84123	0.000210825	0.013378	Chr4	20109574	20110741	-	1058	-
LOC_Os01g71760	62.6745	30.8765	18.0388	5.64211	0	1.96168	37.1966	2.5346	3.89192	0.000215883	0.0136617	Chr1	41570750	41573307	-	1527	Amino acid/polyamine transporter I
LOC_Os11g29870	407.916	155.411	69.9004	42.3159	13.6508	1.96168	211.076	19.3094	3.4501	0.000216302	0.0136617	Chr11	17352085	17355820	+	1339	WRKY domain
LOC_Os10g38590	570.444	226.427	130.781	82.751	77.639	51.9845	309.218	70.7915	2.12663	0.000217444	0.013702	Chr10	20592501	20593608	+	1108	-
LOC_Os05g45440	308.061	448.738	259.308	163.621	145.893	129.471	338.702	146.328	1.21111	0.000218535	0.0137389	Chr5	26366391	26367088	+	698	-
LOC_Os03g61160	8482.31	410.657	15.784	47.958	2.55953	8.82756	2969.58	19.7817	7.23037	0.000220452	0.0137909	Chr3	34739006	34740655	-	1565	-
LOC_Os02g11859	176.338	227.457	116.125	27.2702	75.0795	28.4444	173.307	43.598	1.9875	0.000220669	0.0137909	Chr2	6145982	6146678	-	697	-
LOC_Os11g06130	783.963	765.736	730.572	484.281	461.568	411.953	760.09	452.601	0.747801	0.000221384	0.0137909	Chr11	2909397	2918267	-	3147	-
LOC_Os01g32780	4492.38	1723.94	1111.64	757.924	610.021	589.485	2442.65	652.477	1.90448	0.000222103	0.0137909	Chr1	17990828	17993764	-	1062	UspA
LOC_Os02g33680	215.643	310.823	94.7038	58.3018	67.4009	38.2528	207.057	54.6518	1.9209	0.000222398	0.0137909	Chr2	20082159	20083676	+	1518	U box domain
LOC_Os05g07090	3354.68	2160.32	2202.99	1430.28	1006.75	804.289	2572.66	1080.44	1.25163	0.000222917	0.0137909	Chr5	3730312	3735241	-	2005	Acyl-CoA dehydrogenase/oxidase, N-terminal and middle domain
LOC_Os12g08180	529.015	490.936	573.86	322.541	289.227	309.946	531.27	307.238	0.790132	0.000225588	0.0138991	Chr12	4178415	4182634	-	3607	Serine-threonine/tyrosine-protein kinase, catalytic domain
LOC_Os01g50410	340.992	328.32	381.07	164.562	75.9327	158.896	350.127	133.13	1.3965	0.000225689	0.0138991	Chr1	28938971	28940927	-	1356	Protein kinase domain
LOC_Os07g11739	327.182	138.944	2.25485	4.70176	7.67858	12.7509	156.127	8.37709	4.22196	0.000227667	0.0139701	Chr7	6494465	6502011	+	1850	Cytochrome P450
LOC_Os01g41790	24.4324	17.4967	21.4211	0.940352	2.55953	2.94252	21.1167	2.14747	3.29642	0.000228466	0.0139701	Chr1	23656010	23658316	-	1677	-
LOC_Os11g47240	150.844	68.9574	96.9587	31.972	29.008	38.2528	105.587	33.0776	1.67587	0.000239731	0.0144686	Chr11	28407554	28411173	-	3379	Serine-threonine/tyrosine-protein kinase, catalytic domain
LOC_Os03g17800	391.981	397.277	178.133	129.769	51.1906	30.4061	322.464	70.4551	2.1946	0.000243597	0.0146239	Chr3	9904420	9907008	-	1341	Phosphatidylinositol transfer protein
LOC_Os02g11870	225.203	127.623	27.0582	7.52282	26.4485	15.6934	126.628	16.5549	2.93245	0.000244118	0.0146239	Chr2	6149278	6150318	-	1041	-
novel.732	88.1692	56.6068	51.8616	17.8667	20.4762	21.5785	65.5459	19.9738	1.71499	0.000244649	0.0146239	Chr4	16021629	16023744	-	1023	PF00069:Protein kinase domain
LOC_Os04g37490	299.563	309.794	23.676	42.3159	12.7976	10.7892	211.011	21.9676	3.26476	0.000245037	0.0146239	Chr4	22323860	22326907	+	1370	-
LOC_Os09g32730	257.072	151.295	104.851	52.6597	60.5755	54.9271	171.072	56.0541	1.60969	0.000245054	0.0146239	Chr9	19519240	19520185	-	946	-
LOC_Os03g09880	553.448	881.008	39.4599	94.0352	29.008	26.4827	491.305	49.842	3.30161	0.000245535	0.0146239	Chr3	4913122	4914145	+	1024	-
LOC_Os01g72610	1992.84	1669.39	1101.5	614.99	82.7581	136.337	1587.91	278.028	2.51404	0.000248815	0.0147545	Chr1	42128326	42130347	-	2022	Glycosyltransferase 61
LOC_Os11g19864	214.581	8.23372	34.9502	9.40352	3.4127	2.94252	85.9215	5.25292	4.03316	0.000250951	0.0148487	Chr11	11436951	11446266	-	3015	-
LOC_Os10g25674	167.84	92.6294	96.9587	49.8387	25.5953	34.3294	119.143	36.5878	1.7053	0.000255581	0.015059	Chr10	13289612	13292227	-	1179	-
LOC_Os05g49700	872.132	448.738	161.222	75.2282	88.7303	5.88504	494.031	56.6145	3.12406	0.000255614	0.015059	Chr5	28499349	28500563	-	1215	DNA-binding domain
LOC_Os10g34910	60.55	23.6719	7.89198	0.940352	0	2.94252	30.7046	1.29429	4.60503	0.000256835	0.0150844	Chr10	18635339	18636174	-	836	-
LOC_Os03g56860	158.28	147.178	72.1553	44.1966	34.9802	43.157	125.871	40.7779	1.62819	0.000257209	0.0150844	Chr3	32393527	32394464	-	581	-
LOC_Os07g44140	169.965	373.605	89.0667	43.2562	63.9882	25.5019	210.879	44.2488	2.25108	0.000257711	0.0150844	Chr7	26382581	26385011	+	2285	Cytochrome P450
LOC_Os08g42630	91.3561	51.4608	50.7342	22.5685	8.53176	6.86588	64.517	12.6554	2.35136	0.000258416	0.0150932	Chr8	26945672	26946675	+	1004	-
LOC_Os03g06705	565.133	34.9933	630.231	6.58247	65.6946	35.3103	410.119	35.8624	3.51393	0.000259232	0.0151084	Chr3	3405791	3407199	+	1409	FAE1/Type III polyketide synthase-like protein
LOC_Os07g35350	813.706	126.593	138.673	66.765	52.0437	56.8888	359.658	58.5658	2.61875	0.000261485	0.015207	Chr7	21150011	21152329	-	2123	Glycoside hydrolase family 17
LOC_Os05g25920	69.0482	188.346	65.3907	19.7474	32.4207	10.7892	107.595	20.9858	2.35409	0.000272608	0.0156859	Chr5	15077666	15078358	-	693	-
LOC_Os02g50690	380.296	1073.47	251.416	185.249	66.5477	108.873	568.395	120.223	2.24188	0.00027975	0.0159281	Chr2	30965582	30967599	-	2018	GDSL lipase/esterase
LOC_Os11g29900	617.185	441.533	470.137	290.569	221.826	171.647	509.618	228.014	1.16009	0.00028209	0.0160278	Chr11	17379761	17382948	+	2185	-
LOC_Os10g36703	986.858	927.323	742.974	476.759	353.215	203.034	885.718	344.336	1.36284	0.00028454	0.0161333	Chr10	19631246	19632264	-	1019	Small auxin-up RNA
LOC_Os01g03914	3853.95	3101.03	2303.33	1440.62	1109.98	485.516	3086.1	1012.04	1.60844	0.000286925	0.0162008	Chr1	1673010	1680632	-	2701	Cation efflux protein
LOC_Os12g02160	31.8684	28.818	27.0582	7.52282	4.26588	1.96168	29.2482	4.58346	2.67049	0.000290229	0.0163534	Chr12	658672	659919	-	762	-
LOC_Os09g15680	188.024	166.733	213.084	79.9299	104.941	69.6397	189.28	84.8368	1.15524	0.000294911	0.0165211	Chr9	9570653	9571655	+	855	-
LOC_Os05g46750	19.121	48.3731	32.6954	3.76141	7.67858	2.94252	33.3965	4.79417	2.78759	0.000296247	0.0165211	Chr5	27067365	27070015	-	1842	Protein kinase domain
novel.1198	32.9307	19.5551	41.7148	4.70176	0	0	31.4002	1.56725	4.33569	0.000297778	0.0165724	Chr9	12876671	12877631	-	859	-
LOC_Os10g01110	1015.54	1013.78	1068.8	659.187	377.957	438.436	1032.71	491.86	1.07033	0.000299005	0.0166067	Chr10	100327	103441	-	2015	Peptidase S10, serine carboxypeptidase
LOC_Os05g02010	1032.54	714.275	618.957	439.144	255.953	249.133	788.589	314.744	1.32529	0.000304126	0.0167869	Chr5	574774	576881	+	1548	-
LOC_Os09g39940	1066.53	978.784	125.144	184.309	69.9604	107.892	723.486	120.721	2.58375	0.000304385	0.0167869	Chr9	22907852	22908809	+	871	Phytocyanin domain
LOC_Os06g13190	127.474	143.061	63.1359	37.6141	31.5675	37.2719	111.223	35.4845	1.65034	0.000304721	0.0167869	Chr6	7230154	7230942	+	789	-
LOC_Os02g34970	773.34	174.967	331.463	137.291	78.4922	94.1607	426.59	103.315	2.04612	0.000310364	0.0170286	Chr2	20972763	20974090	+	1121	NAC domain
LOC_Os06g43080	113.664	79.2496	12.4017	4.70176	12.7976	3.92336	68.4384	7.14092	3.25228	0.000312017	0.0170505	Chr6	25895947	25896426	+	480	-
LOC_Os06g03800	479.088	917.031	375.433	228.506	90.4367	197.149	590.517	172.03	1.78026	0.000314106	0.0170958	Chr6	1520743	1526081	+	2137	-
LOC_Os04g32620	1382.03	533.133	476.901	305.614	136.508	213.823	797.354	218.649	1.86701	0.000320482	0.0173732	Chr4	19651659	19656024	+	3858	DNA-binding domain
LOC_Os11g47809	13151	5254.14	3208.66	2309.51	863.414	291.31	7204.61	1154.74	2.64134	0.000323511	0.0174677	Chr11	28827676	28828513	+	697	-
LOC_Os02g09960	423.85	553.718	181.516	124.126	127.976	127.509	386.361	126.537	1.61079	0.000329092	0.0177338	Chr2	5179753	5182124	+	2372	Protein kinase domain
novel.91	1911.04	1678.65	1647.17	1045.67	466.687	475.708	1745.62	662.689	1.39744	0.000331809	0.0177743	Chr1	10270670	10274391	-	3102	PF00010:Helix-loop-helix DNA-binding domain
LOC_Os01g09280	1888.73	1011.72	776.797	478.639	478.632	239.325	1225.75	398.865	1.61946	0.000346291	0.018441	Chr1	4714468	4718746	-	1694	Homeobox domain-like
LOC_Os04g52450	6541.52	5156.37	4081.28	2800.37	2888	2194.14	5259.72	2627.5	1.00127	0.000347295	0.0184583	Chr4	31176650	31182453	+	2260	Aminotransferase class-III
LOC_Os02g12440	367.549	432.27	443.079	257.657	204.762	189.302	414.299	217.24	0.931301	0.000353394	0.0186281	Chr2	6487390	6490577	+	3093	Protein kinase domain
LOC_Os01g74410	4296.92	258.333	407.001	302.793	86.1708	91.2182	1654.09	160.061	3.36945	0.00035392	0.0186281	Chr1	43096392	43097974	+	1583	Homeobox domain-like
LOC_Os07g14150	2017.27	1003.48	578.37	493.685	191.111	226.574	1199.71	303.79	1.98174	0.000360944	0.0189245	Chr7	8075627	8078201	+	2575	Cytidine deaminase-like
LOC_Os06g15750	37.1798	149.236	104.851	24.4492	5.11906	1.96168	97.0889	10.51	3.20858	0.000363014	0.0189641	Chr6	8935092	8939018	-	3276	NB-ARC
LOC_Os02g11070	166.778	614.441	131.909	53.6001	86.1708	26.4827	304.376	55.4179	2.45604	0.000368279	0.0191245	Chr2	5930193	5933079	-	2054	FAE1/Type III polyketide synthase-like protein
LOC_Os03g14110	1340.6	1533.53	1342.76	903.679	572.481	512.98	1405.63	663.046	1.0841	0.000375729	0.019418	Chr3	7667922	7670731	+	1200	-
LOC_Os10g22050	556.635	88.5125	128.527	51.7194	47.7779	42.1761	257.891	47.2245	2.44906	0.000376077	0.019418	Chr10	11390652	11391319	+	387	-
LOC_Os01g66120	16121.2	7895.11	3869.33	3627.88	1893.2	1592.89	9295.2	2371.32	1.9708	0.000379409	0.019511	Chr1	38398517	38401533	-	2156	NAC domain
LOC_Os10g30790	4521.06	4417.39	2455.53	1489.52	1556.19	2013.67	3798	1686.46	1.17134	0.000383354	0.0196219	Chr10	16035403	16038231	-	2829	Major facilitator, sugar transporter-like
LOC_Os01g48000	158.28	84.3956	65.3907	37.6141	27.3016	22.5593	102.689	29.1584	1.81648	0.000383637	0.0196219	Chr1	27474005	27476806	-	2802	Protein kinase domain
LOC_Os10g38360	217.767	482.702	78.9198	38.5544	66.5477	10.7892	259.796	38.6305	2.7473	0.000386534	0.0196958	Chr10	20498004	20499097	+	988	Glutathione S-transferase, N-terminal
LOC_Os04g49757	504.583	56.6068	36.0776	30.0913	9.38494	18.636	199.089	19.3707	3.36319	0.000388581	0.0197631	Chr4	29666140	29672631	+	2046	-
LOC_Os10g26250	22.3079	15.4382	100.341	3.76141	6.82541	2.94252	46.029	4.50978	3.34095	0.000392895	0.0199451	Chr10	13593467	13594281	+	549	-
LOC_Os09g15670	703.229	1145.52	2817.44	549.166	246.568	108.873	1555.39	301.536	2.36677	0.000397061	0.0200442	Chr9	9567471	9568905	+	1435	PPM-type phosphatase domain
LOC_Os03g01740	820.08	396.248	594.154	273.643	271.31	223.632	603.494	256.195	1.23578	0.000397921	0.0200503	Chr3	470268	471096	+	829	-
LOC_Os03g51390	172.089	123.506	81.1747	26.3299	49.4842	12.7509	125.59	29.5217	2.08414	0.000400882	0.0201621	Chr3	29401950	29403115	-	1166	-
LOC_Os09g33820	659.676	658.698	423.912	329.123	175.754	199.111	580.762	234.663	1.30787	0.000402556	0.0201893	Chr9	19965202	19970152	+	2802	Lecithin:cholesterol/phospholipid:diacylglycerol acyltransferase
LOC_Os01g36790	367.549	189.376	63.1359	36.6737	48.631	49.042	206.687	44.7823	2.20667	0.00040291	0.0201893	Chr1	20464606	20469249	-	2232	Serine-threonine/tyrosine-protein kinase, catalytic domain
LOC_Os01g64670	47.8026	100.863	65.3907	27.2702	14.504	14.7126	71.3521	18.8289	1.92395	0.000403835	0.0201984	Chr1	37521803	37524040	-	1641	Inorganic pyrophosphatase
LOC_Os03g58010	109.415	181.142	48.4793	37.6141	18.7699	18.636	113.012	25.0066	2.17781	0.000409628	0.020413	Chr3	33034668	33035629	+	962	GNAT domain
LOC_Os01g61080	139.159	239.807	42.8422	30.0913	34.127	12.7509	140.603	25.6564	2.45239	0.000411756	0.0204815	Chr1	35347978	35350645	+	2161	WRKY domain
LOC_Os07g35370	274.068	277.888	165.732	110.962	55.4564	97.1032	239.229	87.8404	1.44747	0.00042615	0.0210816	Chr7	21155350	21158796	-	2487	Serine-threonine/tyrosine-protein kinase, catalytic domain
LOC_Os09g26780	1343.78	2228.25	993.263	544.464	628.791	699.339	1521.77	624.198	1.28583	0.000428664	0.0211417	Chr9	16273336	16275273	-	1369	-
LOC_Os04g31710	169.965	101.892	43.9696	15.986	30.7143	5.88504	105.276	17.5285	2.58067	0.000428921	0.0211417	Chr4	18994442	18995691	+	1164	-
LOC_Os02g35830	1929.1	1990.5	1695.65	1105.85	760.18	1122.08	1871.75	996.039	0.910415	0.000432308	0.02127	Chr2	21525889	21528977	+	1824	-
LOC_Os04g48850	464.216	207.901	45.0971	51.7194	28.1548	38.2528	239.072	39.3757	2.60304	0.000435173	0.0213337	Chr4	29131810	29134682	-	2185	Aminotransferase, class I/classII
LOC_Os05g46040	1955.66	1608.66	1664.08	1136.89	699.604	753.286	1742.8	863.259	1.01365	0.000436638	0.0213669	Chr5	26705164	26707820	-	2459	PPM-type phosphatase domain
LOC_Os05g51670	1636.97	882.037	337.1	317.839	150.159	58.8504	952.037	175.616	2.43854	0.000446054	0.0217104	Chr5	29631973	29635856	+	2391	-
LOC_Os12g30824	42.4912	209.96	2.25485	0	0	0	84.902	0	8.96576	0.000448125	0.0217721	Chr12	18509843	18528700	-	2846	Terpene synthase, metal-binding domain
LOC_Os11g47820	1888.73	2274.57	1712.56	1257.25	900.101	1001.44	1958.62	1052.93	0.895602	0.000451974	0.021845	Chr11	28838673	28842809	-	2097	Glycoside hydrolase family 17
LOC_Os07g09970	4364.91	4489.44	5587.52	2926.38	2207.17	2878.77	4813.96	2670.77	0.850015	0.000452038	0.021845	Chr7	5313788	5318164	+	1007	-
LOC_Os02g43010	1512.69	1360.62	934.636	744.759	475.219	526.711	1269.32	582.23	1.12462	0.000457425	0.0220269	Chr2	25890441	25895244	-	2075	Peptidase C13, legumain
LOC_Os02g46910	1049.53	1006.57	1295.41	669.531	656.946	511.018	1117.17	612.498	0.866711	0.000467908	0.0224522	Chr2	28621982	28624683	+	2467	Glycoside hydrolase family 16
LOC_Os11g10470	45.678	46.3147	21.4211	7.52282	8.53176	1.96168	37.8046	6.00542	2.64484	0.000473071	0.0225802	Chr11	5710546	5711249	-	704	-
LOC_Os05g31020	992.17	310.823	209.701	88.3931	166.369	59.8313	504.231	104.865	2.26461	0.000476936	0.0227247	Chr5	18016617	18020387	+	2132	Peptide Chain Release Factor eRF1/aRF1, N-terminal
LOC_Os04g09920	141.283	1074.5	12.4017	15.0456	13.6508	51.9845	409.395	26.8937	3.92986	0.000478721	0.0227404	Chr4	5332329	5334479	-	1818	Cytochrome P450
LOC_Os05g47870	1002.79	1672.47	1323.6	721.25	637.322	684.627	1332.96	681.066	0.968891	0.000492357	0.0231749	Chr5	27449301	27454970	-	3077	-
LOC_Os06g51060	8166.81	7511.21	4021.53	2959.29	2543.32	1134.83	6566.52	2212.48	1.56943	0.000494026	0.0232077	Chr6	30890711	30892066	+	1356	Glycoside hydrolase, family 19, catalytic
LOC_Os06g10530	176.338	253.187	136.419	72.4071	23.0358	65.7163	188.648	53.7197	1.81519	0.000497564	0.0232989	Chr6	5431526	5432214	+	689	-
LOC_Os09g31478	4197.07	1825.83	2281.91	1242.21	506.787	257.961	2768.27	668.984	2.04893	0.000504112	0.0235052	Chr9	18978136	18983481	-	2372	Membrane transport protein
LOC_Os03g24760	18.0588	41.1686	7.89198	1.8807	0.853176	1.96168	22.3731	1.56519	3.85345	0.000504566	0.0235052	Chr3	14107200	14110162	-	1761	Terpene synthase, metal-binding domain
novel.231	19.121	106.009	174.751	21.6281	11.0913	11.7701	99.9604	14.8298	2.75327	0.000510227	0.0236069	Chr10	19972921	19975535	-	2615	-
LOC_Os10g34480	14.8719	200.697	16.9114	1.8807	8.53176	5.88504	77.4934	5.4325	3.83085	0.000513693	0.0236866	Chr10	18389977	18394398	-	2420	Cytochrome P450
LOC_Os04g10060	129.598	991.134	10.1468	16.9263	28.1548	36.2911	376.96	27.1241	3.79714	0.000516842	0.0237914	Chr4	5428338	5434028	-	2768	Terpene synthase, metal-binding domain
LOC_Os07g35560	391.981	200.697	90.1941	60.1825	28.1548	68.6588	227.624	52.3321	2.12293	0.000522135	0.0239903	Chr7	21280300	21282637	-	2095	Glycoside hydrolase family 17
LOC_Os02g31867	117.913	152.324	142.056	72.4071	63.135	56.8888	137.431	64.1436	1.09909	0.000523781	0.0239903	Chr2	18824559	18826150	-	1592	-
LOC_Os12g03040	1723.02	1464.57	1877.16	900.857	339.564	222.651	1688.25	487.691	1.7915	0.000524706	0.0239903	Chr12	1139026	1141362	+	1945	NAC domain
LOC_Os08g31250	15.9342	15.4382	13.5291	0.940352	0.853176	0.980841	14.9672	0.92479	4.02039	0.000531991	0.0241611	Chr8	19325136	19326203	+	1068	-
LOC_Os05g46480	5398.51	2878.71	898.559	720.31	441.945	48.0612	3058.59	403.439	2.92235	0.000540798	0.0244792	Chr5	26927607	26928902	+	1296	-
LOC_Os03g37520	6.37368	11.3214	14.6565	0	0	0	10.7839	0	5.98792	0.000542001	0.0244832	Chr3	20815940	20816627	-	492	-
LOC_Os07g39350	1191.88	8366.49	1562.61	1076.7	413.79	361.93	3706.99	617.475	2.58584	0.000554575	0.0249366	Chr7	23582065	23584548	+	2306	Major facilitator, sugar transporter-like
LOC_Os03g12820	1879.17	498.14	323.571	286.807	131.389	106.912	900.295	175.036	2.36283	0.000555887	0.0249543	Chr3	6895178	6898428	+	1903	-
LOC_Os02g44990	1332.1	419.92	260.435	215.341	45.2183	32.3677	670.818	97.6422	2.78059	0.00056304	0.025204	Chr2	27248697	27251470	+	2774	F-box domain
LOC_Os03g45960	8134.94	6465.53	1242.42	1580.73	372.838	149.088	5280.96	700.886	2.91357	0.000563306	0.025204	Chr3	25972225	25973470	-	1246	-
LOC_Os07g09420	1407.52	1613.81	951.548	755.103	563.096	427.646	1324.29	581.949	1.18629	0.000573872	0.0255924	Chr7	4969373	4971156	+	1784	AAA-type ATPase, N-terminal domain
LOC_Os05g38040	3979.3	1198.01	1230.02	818.106	511.052	326.62	2135.78	551.926	1.95219	0.000576849	0.025683	Chr5	22303384	22306367	-	2221	-
LOC_Os02g34250	37.1798	19.5551	12.4017	0	3.4127	0.980841	23.0455	1.46451	3.9427	0.000578992	0.0257362	Chr2	20489000	20489978	-	790	-
LOC_Os12g29400	696.856	340.67	167.987	133.53	79.3454	116.72	401.837	109.865	1.87161	0.000581518	0.0258063	Chr12	17463629	17465265	-	897	-
LOC_Os01g64540	173.152	273.771	161.222	105.319	49.4842	51.9845	202.715	68.9294	1.55735	0.000590861	0.026093	Chr1	37451397	37453003	-	1607	UDP-glucuronosyl/UDP-glucosyltransferase
LOC_Os01g45659	110.477	24.7012	16.9114	1.8807	9.38494	1.96168	50.6966	4.40911	3.50823	0.0005962	0.026286	Chr1	25931149	25931730	+	582	-
LOC_Os03g60580	3783.84	2877.69	1795.99	1078.58	148.453	115.739	2819.17	447.592	2.65509	0.000604209	0.026596	Chr3	34430584	34431200	+	453	Actin-depolymerising factor homology domain
LOC_Os11g05930	1959.91	2011.09	1874.91	1323.08	924.843	814.098	1948.63	1020.67	0.93296	0.000608053	0.0266787	Chr11	2788996	2793735	+	2663	Signal transduction response regulator, receiver domain
novel.895	478.026	198.639	67.6456	67.7054	26.4485	8.82756	248.103	34.3271	2.85341	0.000610599	0.0267472	Chr6	22556207	22560475	+	3992	-
LOC_Os07g33580	509.894	274.8	357.394	172.084	63.9882	31.3869	380.696	89.1532	2.09423	0.000615711	0.0269277	Chr7	20063394	20065355	+	1606	Cytochrome P450
LOC_Os04g02754	1185.5	1310.19	668.564	406.232	427.441	134.375	1054.75	322.683	1.70837	0.000620591	0.027054	Chr4	1054609	1070954	+	1781	Amidase signature domain
LOC_Os01g71700	39.3044	53.5192	5.63713	4.70176	1.70635	0.980841	32.8202	2.46298	3.73838	0.000633024	0.0274172	Chr1	41549008	41551494	-	1819	Amino acid/polyamine transporter I
LOC_Os01g59000	549.199	389.043	241.269	151.397	136.508	45.1187	393.17	111.008	1.82373	0.000638352	0.027432	Chr1	34099444	34101175	+	1732	Cytochrome P450
LOC_Os01g03730	791.399	552.689	287.494	205.937	149.306	228.536	543.86	194.593	1.48347	0.000640741	0.0274911	Chr1	1566138	1569472	+	1304	S1/P1 nuclease
LOC_Os01g31980	539.638	536.221	289.749	174.906	151.865	42.1761	455.203	122.982	1.88738	0.000644841	0.0276234	Chr1	17504338	17512384	-	2075	Multi antimicrobial extrusion protein
LOC_Os01g16260	672.423	574.302	510.724	349.811	174.901	142.222	585.816	222.311	1.39799	0.00064894	0.0277552	Chr1	9203963	9211788	-	2280	Major facilitator superfamily
LOC_Os07g44440	406.853	261.421	10.1468	9.40352	1.70635	0	226.14	3.70329	5.93271	0.000650874	0.0277941	Chr7	26551781	26552660	+	663	Alkyl hydroperoxide reductase subunit C/ Thiol specific antioxidant
LOC_Os02g06950	8.49824	14.409	7.89198	0	0	0	10.2664	0	5.91886	0.000655666	0.0279329	Chr2	3522909	3529543	-	1512	NAC domain
LOC_Os05g18730	459.967	111.155	184.898	74.2878	63.9882	65.7163	252.007	67.9974	1.89002	0.000657209	0.0279329	Chr5	10847748	10854702	-	2487	-
LOC_Os10g35070	6963.25	4624.26	915.47	1350.35	628.791	687.569	4167.66	888.902	2.22919	0.000658319	0.0279364	Chr10	18707759	18711564	+	1630	Glycoside hydrolase, family 27
LOC_Os04g44900	763.779	619.588	361.904	284.927	230.358	238.344	581.757	251.21	1.21188	0.000663719	0.0280723	Chr4	26572700	26575257	-	2558	Legume lectin domain
LOC_Os07g35290	141.283	131.74	38.3325	31.0316	13.6508	25.5019	103.785	23.3948	2.15292	0.000667351	0.0280723	Chr7	21121293	21125295	+	2402	Serine-threonine/tyrosine-protein kinase, catalytic domain
LOC_Os10g23310	1292.79	189.376	34.9502	14.1053	0	7.84672	505.707	7.31734	6.11331	0.000671404	0.0281834	Chr10	12181085	12183127	-	1647	Transferase
LOC_Os03g46200	40.3666	58.6653	6.76456	4.70176	1.70635	3.92336	35.2655	3.44383	3.36648	0.000673755	0.0282134	Chr3	26119968	26120832	+	865	GNAT domain
LOC_Os10g36180	485.462	164.674	82.3021	31.0316	74.2263	15.6934	244.146	40.3171	2.59571	0.000674196	0.0282134	Chr10	19346334	19348306	+	1650	-
LOC_Os10g05020	134.91	32.9349	10.1468	9.40352	4.26588	2.94252	59.3304	5.53731	3.42217	0.000676463	0.0282647	Chr10	2453869	2455724	-	1856	Cytochrome P450
LOC_Os12g08700	171.027	65.8698	12.4017	15.986	6.82541	3.92336	83.0995	8.91159	3.22141	0.000682895	0.0284024	Chr12	4412911	4415903	-	546	-
LOC_Os09g04310	225.203	138.944	16.9114	21.6281	20.4762	13.7318	127.02	18.612	2.77023	0.000686542	0.028475	Chr9	2293404	2294675	+	1272	-
LOC_Os06g50220	1399.02	564.01	641.506	387.425	267.897	297.195	868.179	317.506	1.45136	0.000686737	0.028475	Chr6	30408646	30414576	+	2285	-
LOC_Os04g27670	8222.05	1678.65	873.755	980.787	299.465	144.184	3591.48	474.812	2.91916	0.000691212	0.0285458	Chr4	16349934	16354016	-	2147	Terpene synthase, metal-binding domain
LOC_Os11g32210	110.477	33.9641	72.1553	22.5685	3.4127	6.86588	72.1988	10.949	2.72493	0.00069265	0.0285458	Chr11	19022758	19029390	-	4161	NB-ARC
LOC_Os02g45160	217.767	141.002	242.397	102.498	81.0517	59.8313	200.389	81.1271	1.30344	0.000708632	0.0290621	Chr2	27390847	27394188	-	3084	Aluminum-activated malate transporter
LOC_Os11g30290	6.37368	40.1394	2.25485	0	0	0	16.256	0	6.58256	0.00071467	0.0291656	Chr11	17596500	17596889	-	390	PHF5-like
LOC_Os08g04340	32.9307	43.227	4.50971	0	2.55953	0	26.8891	0.853176	4.9221	0.000724585	0.0293716	Chr8	2129613	2130615	+	889	Phytocyanin domain
LOC_Os11g37940	41.4289	23.6719	1.12743	0	0.853176	0	22.0761	0.284392	6.06157	0.000729249	0.0294727	Chr11	22498498	22500491	+	958	Barwin domain
LOC_Os02g05550	84.9824	72.0451	75.5376	38.5544	27.3016	26.4827	77.5217	30.7796	1.33316	0.000734824	0.0295752	Chr2	2681214	2685181	+	3375	Reverse transcriptase, RNA-dependent DNA polymerase
LOC_Os08g03200	7.43596	7.20451	16.9114	0	0	0	10.5173	0	5.95083	0.000735051	0.0295752	Chr8	1477538	1484910	-	5565	Protein kinase domain
LOC_Os01g07730	468.465	466.234	210.829	135.411	77.639	173.609	381.843	128.886	1.56833	0.000749942	0.0300852	Chr1	3711212	3713653	+	1652	-
LOC_Os03g17810	120.038	5.14608	14.6565	3.76141	0	0	46.6134	1.2538	5.22564	0.000759592	0.0303488	Chr3	9915938	9917286	-	1254	-
LOC_Os01g28474	181.65	1.02922	11.2743	2.82106	0.853176	2.94252	64.6511	2.20558	4.88219	0.000759866	0.0303488	Chr1	15948776	15953098	+	1593	Transferase
LOC_Os09g23570	177.401	192.463	161.222	55.4808	87.8771	25.5019	177.029	56.2866	1.64986	0.000761757	0.0303797	Chr9	14007858	14010160	-	2303	Protein kinase domain
LOC_Os05g08850	94.5429	72.0451	51.8616	28.2106	5.11906	8.82756	72.8165	14.0524	2.37746	0.000780316	0.0308032	Chr5	4885395	4888011	+	2617	Cytochrome P450
LOC_Os08g30020	8544.98	3884.26	3390.17	2418.59	1232.84	1878.31	5273.14	1843.24	1.51647	0.000786978	0.0309562	Chr8	18452605	18458174	+	3491	-
LOC_Os03g05900	514.144	236.719	241.269	111.902	48.631	8.82756	330.711	56.4535	2.55002	0.000787542	0.0309562	Chr3	2958312	2960616	+	1955	FAD/NAD(P)-binding domain
LOC_Os08g37660	79.671	72.0451	104.851	31.972	39.2461	20.5977	85.5222	30.6052	1.47766	0.000787611	0.0309562	Chr8	23853216	23854479	-	1120	Phytocyanin domain
LOC_Os06g13690	19.121	3.08765	13.5291	0	0	0	11.9126	0	6.1314	0.000789297	0.0309776	Chr6	7595183	7595952	+	306	-
LOC_Os07g15160	333.556	270.684	330.336	187.13	81.9049	95.1415	311.525	121.392	1.36021	0.000794357	0.0311312	Chr7	8702188	8706000	-	2346	DNA helicase Pif1-like
LOC_Os03g63580	35.0552	209.96	57.4987	27.2702	10.2381	8.82756	100.838	15.4453	2.70826	0.000813062	0.0317726	Chr3	35906755	35908400	+	1646	Phosphoesterase
LOC_Os10g40950	253.885	143.061	210.829	107.2	73.3731	57.8696	202.592	79.481	1.34942	0.000815485	0.0318081	Chr10	21994145	21995166	+	1022	Major facilitator, sugar transporter-like
LOC_Os06g49430	1817.56	2060.49	1554.72	1166.98	1048.55	1053.42	1810.92	1089.65	0.73299	0.000816313	0.0318081	Chr6	29949829	29954874	+	3259	Protein kinase domain
LOC_Os01g15000	1365.03	866.599	662.927	513.432	363.453	264.827	964.852	380.571	1.34212	0.000819626	0.0318799	Chr1	8404247	8408377	+	2738	Fungal lipase-like domain
LOC_Os03g11900	3540.58	6457.3	1306.69	1497.98	493.136	730.726	3768.19	907.281	2.05434	0.000821004	0.0318799	Chr3	6232979	6238297	-	2563	Major facilitator, sugar transporter-like
LOC_Os04g51160	280.442	170.85	14.6565	22.5685	6.82541	0	155.316	9.79795	3.98614	0.000822796	0.0318799	Chr4	30291461	30293040	-	1361	Alternative oxidase
LOC_Os11g03300	1975.84	1673.5	1306.69	811.524	169.782	151.049	1652.01	377.452	2.12997	0.000822852	0.0318799	Chr11	1233928	1236052	+	1755	NAC domain
LOC_Os07g02810	118.975	117.331	164.604	55.4808	53.7501	70.6205	133.637	59.9505	1.15709	0.000824187	0.0318862	Chr7	1055140	1058131	+	2302	Multicopper oxidase, type 3
LOC_Os05g38264	951.803	654.581	191.662	234.148	93.8494	85.3331	599.349	137.777	2.12134	0.000835035	0.0322599	Chr5	22436430	22437469	-	1040	-
LOC_Os11g34624	58.4254	67.9282	32.6954	16.9263	3.4127	1.96168	53.0163	7.43358	2.83706	0.00083777	0.0323196	Chr11	20264311	20275890	+	1791	Serine-threonine/tyrosine-protein kinase, catalytic domain
LOC_Os08g01910	351.615	197.609	37.2051	51.7194	17.9167	6.86588	195.476	25.5007	2.93851	0.000839139	0.0323265	Chr8	557358	558625	-	998	-
LOC_Os04g56570	27.6193	11.3214	5.63713	0	0.853176	0	14.8593	0.284392	5.49048	0.000841034	0.0323536	Chr4	33733608	33734326	-	468	Heavy metal-associated domain, HMA
LOC_Os05g37660	158.28	602.091	1469.04	196.534	155.278	77.4864	743.136	143.099	2.37624	0.000856995	0.0328027	Chr5	22040054	22041963	-	1910	Transferase
LOC_Os07g39520	507.77	272.742	257.053	180.548	89.5835	99.0649	345.855	123.065	1.49126	0.000860627	0.0328745	Chr7	23677863	23679948	+	1459	Protein kinase domain
LOC_Os01g65100	2408.19	4733.36	3797.17	2083.82	1415.42	1342.77	3646.24	1614	1.17579	0.000865461	0.0329776	Chr1	37790111	37792998	+	2715	Proton-dependent oligopeptide transporter family
LOC_Os01g62970	1457.45	421.978	259.308	245.432	64.8414	48.0612	712.911	119.445	2.57756	0.000868182	0.0329776	Chr1	36479579	36484051	+	1609	-
LOC_Os06g13870	89.2315	73.0743	59.7536	19.7474	34.9802	15.6934	74.0198	23.4737	1.65128	0.000872308	0.033088	Chr6	7709065	7710506	+	1442	U box domain
LOC_Os04g45130	254.947	124.535	100.341	66.765	32.4207	47.0803	159.941	48.7553	1.71558	0.00087462	0.0331294	Chr4	26684582	26685645	-	752	-
LOC_Os01g13610	61.6122	649.435	5.63713	4.70176	0	3.92336	238.895	2.87504	6.38283	0.000882676	0.0333416	Chr1	7619080	7624561	-	1332	NmrA-like domain
LOC_Os02g11760	1716.64	1203.15	1023.7	637.559	731.172	672.857	1314.5	680.529	0.949774	0.00088435	0.0333584	Chr2	6069031	6075807	+	4703	ABC-2 type transporter
novel.504	834.952	358.167	288.621	206.877	42.6588	43.157	493.913	97.5644	2.34024	0.000886348	0.0333874	Chr2	19346761	19351878	-	4975	PF13639:Ring finger domain
LOC_Os06g40440	2661.01	4497.67	3617.91	1770.68	1125.34	2007.78	3592.2	1634.6	1.13607	0.00088961	0.0333911	Chr6	24089903	24091217	+	1247	Tetratricopeptide-like helical domain
LOC_Os02g36140	743.596	1242.26	3.38228	28.2106	11.0913	13.7318	663.08	17.6779	5.22953	0.000890769	0.0333911	Chr2	21765009	21773418	+	3252	Terpene synthase, N-terminal domain
LOC_Os09g11480	4940.66	710.158	253.671	291.509	299.465	246.191	1968.16	279.055	2.8182	0.000894644	0.0333911	Chr9	6404474	6406039	-	1566	DNA-binding domain
LOC_Os05g16430	184.837	19.5551	65.3907	19.7474	11.9445	6.86588	89.9275	12.8526	2.80576	0.000902438	0.0336204	Chr5	9321701	9328355	+	2741	Protein kinase domain
LOC_Os10g39100	111.539	165.704	43.9696	33.8527	20.4762	29.4252	107.071	27.918	1.94208	0.000905402	0.0336847	Chr10	20842836	20845276	+	1358	-
LOC_Os01g02920	1163.2	1081.71	700.132	583.959	262.778	281.501	981.678	376.079	1.38446	0.000910441	0.0338258	Chr1	1071962	1075030	-	2288	Glycosyltransferase 61
LOC_Os03g21060	2740.68	2146.94	1108.26	1017.46	511.906	330.543	1998.63	619.97	1.68876	0.000920615	0.0341105	Chr3	11973970	11976426	-	1846	NAC domain
LOC_Os01g02020	1640.16	1174.33	780.179	655.426	448.771	447.263	1198.22	517.153	1.21238	0.000939704	0.0346758	Chr1	549108	553287	+	2319	Thiolase, N-terminal
LOC_Os11g39370	930.557	646.347	485.921	366.737	316.528	270.712	687.608	317.993	1.11264	0.000953448	0.0350402	Chr11	23431233	23436807	-	2851	Serine-threonine/tyrosine-protein kinase, catalytic domain
LOC_Os08g29910	16.9965	33.9641	6.76456	1.8807	0	0	19.2417	0.626901	4.95904	0.000957844	0.0351067	Chr8	18376943	18379503	+	744	UbiA prenyltransferase family
LOC_Os04g01310	260.259	215.106	135.291	78.0492	86.1708	99.0649	203.552	87.7616	1.21469	0.000964605	0.0352398	Chr4	240548	243305	-	2758	Protein kinase domain
LOC_Os02g36070	555.572	1612.78	30.4405	38.5544	63.135	132.413	732.931	78.0343	3.23198	0.000968868	0.0352435	Chr2	21690378	21692186	+	1809	Cytochrome P450
LOC_Os05g10625	150.844	126.593	137.546	75.2282	50.3374	69.6397	138.328	65.0684	1.09	0.000981198	0.0355131	Chr5	5790217	5791479	+	1263	-
LOC_Os09g29940	1110.08	808.963	519.744	392.127	375.397	339.371	812.93	368.965	1.13974	0.00099342	0.0358781	Chr9	18217457	18221156	-	2366	GDP-fucose protein O-fucosyltransferase
LOC_Os11g37774	188.024	91.6001	224.358	77.1089	40.0993	49.042	167.994	55.4167	1.60034	0.000995949	0.0358853	Chr11	22351283	22356398	+	2994	NB-ARC
LOC_Os03g26530	9.56052	26.7596	21.4211	0	2.55953	0	19.2471	0.853176	4.43153	0.000996263	0.0358853	Chr3	15149939	15151951	+	2013	FAE1/Type III polyketide synthase-like protein
LOC_Os07g35580	891.253	808.963	801.6	444.787	570.775	386.451	833.939	467.338	0.834916	0.00100086	0.036003	Chr7	21295196	21299576	-	2441	Serine-threonine/tyrosine-protein kinase, catalytic domain
LOC_Os07g37210	148.719	37.0517	52.989	25.3895	8.53176	10.7892	79.5867	14.9035	2.419	0.00103544	0.0368567	Chr7	22293735	22295309	-	1332	Homeobox domain-like
LOC_Os02g12350	28.6816	23.6719	22.5485	6.58247	5.11906	3.92336	24.9673	5.20829	2.25965	0.00104289	0.0370732	Chr2	6424555	6430620	-	2052	Histone deacetylase domain
LOC_Os12g41630	69.0482	21.6135	29.3131	11.2842	4.26588	2.94252	39.9916	6.16421	2.6987	0.00105241	0.0372998	Chr12	25758556	25759610	-	1055	F-box domain
LOC_Os08g08980	431.286	2417.63	29.3131	59.2422	4.26588	14.7126	959.408	26.0736	5.20205	0.00105339	0.0372998	Chr8	5228822	5230034	+	983	Cupin 1
LOC_Os07g26550	164.653	42.1978	9.01941	13.1649	2.55953	2.94252	71.9569	6.22233	3.53459	0.00107545	0.0379326	Chr7	15294889	15296330	-	803	-
LOC_Os04g13220	1373.53	533.133	355.139	302.793	190.258	164.781	753.934	219.278	1.78177	0.00108286	0.0381443	Chr4	7317232	7325788	-	4974	ABC transporter type 1, transmembrane domain
LOC_Os08g02030	1220.56	832.635	269.455	318.779	80.1985	73.563	774.217	157.514	2.29752	0.00109609	0.0385107	Chr8	655748	657391	-	1644	Transferase
LOC_Os02g46480	766.966	553.718	594.154	411.874	298.612	294.252	638.279	334.913	0.930515	0.00109937	0.038566	Chr2	28332931	28335404	+	710	-
LOC_Os04g30110	14.8719	16.4674	10.1468	0.940352	0	0.980841	13.8287	0.640398	4.47619	0.00110051	0.038566	Chr4	17961848	17962684	-	837	Wall-associated receptor kinase, galacturonan-binding domain
LOC_Os06g05450	862.571	185.259	167.987	134.47	37.5397	24.521	405.272	65.5104	2.62933	0.00110194	0.0385666	Chr6	2461242	2462587	+	411	-
LOC_Os01g72490	2343.39	1656.01	1058.65	930.008	511.052	613.025	1686.02	684.695	1.30025	0.00114266	0.0397674	Chr1	42037167	42039622	-	2342	-
LOC_Os01g71624	279.38	24.7012	69.9004	30.0913	6.82541	4.9042	124.66	13.9403	3.16159	0.00114289	0.0397674	Chr1	41495707	41498656	+	1829	-
LOC_Os03g61920	1692.21	967.462	671.946	516.253	464.981	357.026	1110.54	446.087	1.31584	0.00116286	0.0403346	Chr3	35100038	35103600	+	1777	Electron transfer flavoprotein, alpha/beta-subunit, N-terminal
LOC_Os03g06700	138.096	7.20451	209.701	4.70176	20.4762	11.7701	118.334	12.316	3.26072	0.00118558	0.0410703	Chr3	3402621	3404272	+	1652	FAE1/Type III polyketide synthase-like protein
LOC_Os02g36110	220.954	1966.83	11.2743	34.793	6.82541	18.636	733.02	20.0848	5.19039	0.00118742	0.0410818	Chr2	21740304	21742030	+	1727	Cytochrome P450
LOC_Os11g30760	372.86	839.84	236.76	203.116	131.389	90.2373	483.153	141.581	1.77099	0.00119186	0.0411138	Chr11	17911043	17912054	+	1012	-
LOC_Os07g27780	2770.43	1305.04	1218.75	825.629	732.025	625.776	1764.74	727.81	1.27781	0.00119464	0.0411138	Chr7	16209147	16210655	-	1148	Aminotransferase class-III
LOC_Os01g49380	178.463	155.411	134.164	88.3931	76.7858	68.6588	156.013	77.9459	1.00124	0.00119665	0.0411138	Chr1	28384020	28387158	-	1300	-
LOC_Os07g35380	56.3008	38.081	22.5485	4.70176	6.82541	12.7509	38.9768	8.0927	2.27447	0.00119894	0.0411138	Chr7	21160895	21163892	-	2245	Protein kinase domain
LOC_Os02g44880	234.764	439.475	436.314	202.176	129.683	141.241	370.184	157.7	1.23132	0.0012083	0.0413822	Chr2	27182922	27186705	+	1664	-
LOC_Os01g71710	36.1175	12.3506	11.2743	2.82106	0	0.980841	19.9141	1.2673	3.99626	0.0012159	0.0415744	Chr1	41552037	41554504	-	1549	Amino acid/polyamine transporter I
novel.138	82.8578	9.26294	2.25485	1.8807	0	0	31.4585	0.626901	5.66293	0.00121828	0.0415744	Chr1	35202956	35205656	-	693	-
LOC_Os09g27950	157.217	254.216	154.457	100.618	37.5397	35.3103	188.63	57.8226	1.70677	0.00122003	0.0415744	Chr9	16979991	16983978	-	1844	Glycosyl transferase, family 31
LOC_Os06g38660	226.266	243.924	27.0582	41.3755	17.0635	30.4061	165.749	29.615	2.4865	0.00122973	0.0418524	Chr6	22956662	22957316	-	514	-
LOC_Os08g24750	669.236	162.616	36.0776	47.0176	24.7421	53.9462	289.31	41.902	2.78865	0.00123959	0.042058	Chr8	14976007	14978065	+	2059	Xyloglucan fucosyltransferase
LOC_Os01g71690	498.209	706.042	516.361	317.839	244.862	124.567	573.537	229.089	1.32366	0.00124042	0.042058	Chr1	41539690	41545870	-	2792	Glycoside hydrolase family 17
LOC_Os07g46846	323.995	4047.9	152.203	209.699	135.655	195.187	1508.03	180.18	3.06531	0.0012512	0.0422652	Chr7	28002587	28004412	+	1581	-
LOC_Os12g41490	80.7333	58.6653	37.2051	24.4492	10.2381	10.7892	58.8679	15.1588	1.96001	0.00125582	0.0423688	Chr12	25699763	25702555	+	2793	Protein kinase domain
LOC_Os07g03200	529.015	353.021	86.8118	98.737	35.8334	83.3714	322.949	72.6473	2.15358	0.00126494	0.0425706	Chr7	1255307	1255668	-	252	-
LOC_Os01g51330	152.968	121.447	125.144	62.0632	71.6668	40.2145	133.187	57.9815	1.19718	0.00127359	0.0427102	Chr1	29521077	29523276	-	1492	-
LOC_Os03g42730	372.86	212.018	302.15	168.323	66.5477	80.4289	295.676	105.1	1.4928	0.00127479	0.0427102	Chr3	23789242	23791395	-	1245	-
LOC_Os01g11910	659.676	873.804	333.718	308.436	81.0517	133.394	622.399	174.294	1.8369	0.00128516	0.0428626	Chr1	6462706	6465037	+	2154	Myc-type, basic helix-loop-helix (bHLH) domain
LOC_Os01g24420	293.189	92.6294	83.4295	56.4211	33.2739	19.6168	156.416	36.4373	2.10162	0.00128624	0.0428626	Chr1	13765231	13772186	+	2377	-
LOC_Os10g17940	82.8578	29.8472	22.5485	11.2842	8.53176	4.9042	45.0845	8.24006	2.45009	0.00129104	0.0429698	Chr10	9078458	9080282	+	1825	F-box domain
LOC_Os03g41480	299.563	75.1327	218.721	53.6001	52.8969	8.82756	197.805	38.4415	2.36116	0.00131314	0.0435615	Chr3	23077832	23080251	-	471	-
LOC_Os06g50940	27.6193	10.2922	4.50971	0	0	0.980841	14.1404	0.326947	5.41897	0.00131363	0.0435615	Chr6	30828271	30830434	-	1627	GDSL lipase/esterase
LOC_Os05g26070	656.489	419.92	397.981	273.643	221.826	240.306	491.463	245.258	1.0031	0.00131879	0.0436556	Chr5	15164312	15166467	-	2039	-
LOC_Os11g38160	41.4289	34.9933	18.0388	4.70176	9.38494	4.9042	31.487	6.3303	2.3068	0.00131997	0.0436556	Chr11	22625530	22627579	+	1943	Major facilitator, sugar transporter-like
LOC_Os02g57700	8.49824	37.0517	19.1662	2.82106	2.55953	1.96168	21.5721	2.44742	3.13842	0.0013229	0.0436556	Chr2	35334956	35340821	+	3070	Protein kinase domain
LOC_Os06g29730	327.182	224.369	148.82	91.2142	38.3929	8.82756	233.457	46.1449	2.33856	0.00133345	0.0439503	Chr6	17066919	17068618	-	544	-
LOC_Os12g05210	575.756	113.214	76.665	52.6597	60.5755	27.4635	255.211	46.8996	2.44315	0.00133587	0.0439769	Chr12	2312450	2313272	+	823	-
LOC_Os08g03870	917.81	502.257	508.469	344.169	272.163	273.655	642.845	296.662	1.11578	0.00134641	0.0441359	Chr8	1843879	1846218	+	1296	Cysteine oxygenase/2-aminoethanethiol dioxygenase
LOC_Os10g42410	2691.82	2162.38	2358.58	1621.17	778.95	844.504	2404.26	1081.54	1.15257	0.00136916	0.0447472	Chr10	22829131	22831617	-	2487	-
LOC_Os09g36790	277.255	335.524	209.701	120.365	141.627	59.8313	274.16	107.275	1.35246	0.00137193	0.0447841	Chr9	21224394	21225661	+	1268	-
LOC_Os08g01350	866.82	737.947	818.511	556.689	481.191	464.918	807.76	500.933	0.689258	0.00137708	0.0448981	Chr8	222452	225362	-	1222	-
LOC_Os02g32140	624.621	302.589	104.851	108.141	92.9962	55.9079	344.02	85.6815	2.00522	0.0013969	0.0453809	Chr2	18986678	18988855	-	1554	DNA-binding domain
LOC_Os08g34390	405.791	7.20451	36.0776	4.70176	21.3294	6.86588	149.691	10.9657	3.76687	0.00141349	0.0457012	Chr8	21591002	21592039	-	1038	-
LOC_Os11g43990	163.591	259.362	172.496	109.081	72.52	47.0803	198.483	76.2271	1.38048	0.00143486	0.046282	Chr11	26577115	26582185	-	1888	-
LOC_Os11g02480	369.673	301.56	243.524	168.323	145.893	84.3523	304.919	132.856	1.19795	0.00145028	0.046632	Chr11	759587	763334	-	1074	WRKY domain
LOC_Os03g51920	1246.05	1001.43	967.332	610.289	144.187	164.781	1071.6	306.419	1.80639	0.00145086	0.046632	Chr3	29784613	29787015	-	2066	-
LOC_Os01g66130	277.255	237.749	255.926	167.383	131.389	126.528	256.977	141.767	0.85817	0.00145645	0.0467293	Chr1	38409201	38413065	+	2774	Armadillo-type fold
LOC_Os09g27260	93.4806	39.1102	3.38228	0	0.853176	5.88504	45.3244	2.24607	4.35212	0.00145905	0.0467293	Chr9	16573500	16574893	-	1394	-
LOC_Os03g20600	353.739	205.843	13.5291	15.0456	30.7143	32.3677	191.037	26.0426	2.875	0.00146224	0.0467572	Chr3	11667466	11668239	-	774	-
LOC_Os06g01360	3768.97	1698.2	1261.59	1002.42	816.489	604.198	2242.92	807.701	1.47347	0.00146794	0.0467931	Chr6	214967	218294	-	2271	Homogentisate 1,2-dioxygenase
LOC_Os06g46140	73.2973	148.207	98.0861	52.6597	23.8889	27.4635	106.53	34.6707	1.62127	0.00148165	0.0470645	Chr6	27962690	27964223	-	1534	-
LOC_Os06g48210	346.303	160.558	50.7342	47.0176	50.3374	28.4444	185.865	41.9331	2.1474	0.00148758	0.0471753	Chr6	29163789	29166834	+	2154	DEAD/DEAH box helicase domain
LOC_Os01g63980	82.8578	49.4023	15.784	14.1053	3.4127	3.92336	49.348	7.14712	2.79153	0.00149223	0.0471753	Chr1	37146917	37149200	-	1824	-
LOC_Os06g21820	4339.41	2315.73	3922.32	1426.51	1330.95	305.041	3525.82	1020.84	1.78808	0.0014957	0.0471753	Chr6	12604816	12606666	+	1328	SAM dependent carboxyl methyltransferase
LOC_Os03g55240	1487.19	699.866	330.336	354.513	191.965	144.184	839.131	230.22	1.86595	0.00149806	0.0471753	Chr3	31440748	31446119	+	2545	Cytochrome P450
LOC_Os01g61440	744.658	332.436	235.632	192.772	131.389	111.816	437.576	145.326	1.59036	0.0014984	0.0471753	Chr1	35525524	35527592	-	1489	-
LOC_Os05g19910	59.4877	226.427	52.989	31.972	15.3572	26.4827	112.968	24.6039	2.20177	0.00149853	0.0471753	Chr5	11609440	11615022	-	1602	Transferase
LOC_Os11g45040	62.6745	52.49	41.7148	22.5685	7.67858	13.7318	52.2931	14.6596	1.84027	0.00151255	0.0473698	Chr11	27258523	27260356	-	543	-
LOC_Os10g40490	222.017	119.389	57.4987	46.0773	18.7699	38.2528	132.968	34.3666	1.95465	0.00151519	0.0473698	Chr10	21679082	21681432	+	1478	U box domain
LOC_Os01g53100	43.5535	13.3798	42.8422	6.58247	6.82541	5.88504	33.2585	6.43097	2.36756	0.00151565	0.0473698	Chr1	30516831	30517430	+	444	Ubiquitin domain
LOC_Os06g24730	2334.89	2675.96	1789.23	1487.64	739.704	762.113	2266.69	996.485	1.18577	0.00151568	0.0473698	Chr6	14526887	14532030	+	3743	-
LOC_Os07g23570	114.726	41.1686	0	2.82106	1.70635	0	51.9649	1.50914	5.09858	0.00153418	0.0478379	Chr7	13323931	13326401	+	2009	Cytochrome P450
LOC_Os06g36040	48.8649	59.6945	42.8422	22.5685	15.3572	12.7509	50.4672	16.8922	1.57968	0.00154346	0.0480722	Chr6	21063302	21063943	-	642	-
LOC_Os01g74490	587.441	148.207	72.1553	72.4071	40.9524	50.0229	269.268	54.4608	2.30632	0.00156661	0.0485149	Chr1	43141841	43142670	+	830	Heavy metal-associated domain, HMA
LOC_Os09g28180	553.448	157.47	96.9587	85.5721	39.2461	58.8504	269.292	61.2229	2.13788	0.00157197	0.0486254	Chr9	17091951	17096006	-	4056	Protein kinase domain
LOC_Os02g37480	33078.3	2377.49	693.367	766.387	75.9327	57.8696	12049.7	300.063	5.32758	0.00158278	0.048904	Chr2	22622379	22623188	+	728	-
LOC_Os07g32010	1511.62	1637.48	1242.42	967.622	807.105	616.949	1463.84	797.225	0.876672	0.00158951	0.0490342	Chr7	19037668	19039618	+	1951	UDP-glucuronosyl/UDP-glucosyltransferase
LOC_Os04g46970	8.49824	78.2204	3.38228	1.8807	1.70635	0	30.0336	1.19569	4.63619	0.0015906	0.0490342	Chr4	27843255	27848331	-	3137	UDP-glucuronosyl/UDP-glucosyltransferase
LOC_Os03g19580	1038.91	894.388	498.322	379.902	393.314	377.624	810.54	383.613	1.07939	0.00159491	0.0490806	Chr3	11007513	11011887	-	1991	Cytochrome c-552/DMSO reductase-like, haem-binding domain
LOC_Os11g37970	16607.7	15532.9	1706.92	3150.18	2231.91	564.964	11282.5	1982.35	2.50878	0.00159753	0.0490806	Chr11	22511506	22512404	+	685	Barwin domain
LOC_Os06g45630	33.993	27.7888	4.50971	2.82106	0.853176	1.96168	22.0972	1.87864	3.5694	0.00160253	0.0491669	Chr6	27622464	27626274	+	3811	Serine-threonine/tyrosine-protein kinase, catalytic domain
LOC_Os10g13950	15.9342	10.2922	22.5485	0.940352	2.55953	0	16.2583	1.16663	3.75708	0.00160529	0.0491669	Chr10	7580575	7582846	-	750	-
LOC_Os06g30640	745.721	500.199	158.967	145.755	150.159	138.299	468.295	144.737	1.69413	0.00160577	0.0491669	Chr6	17737912	17739429	-	1518	Cytochrome P450
LOC_Os09g23140	74.3596	98.8047	119.507	46.0773	9.38494	15.6934	97.5571	23.7185	2.04252	0.00161606	0.0493707	Chr9	13688245	13690949	-	1678	-
LOC_Os01g52060	135.972	62.7821	25.9308	21.6281	10.2381	2.94252	74.8949	11.6029	2.68941	0.00163136	0.0496149	Chr1	29937548	29937875	+	195	-
LOC_Os05g33410	27.6193	63.8113	2.25485	1.8807	3.4127	0.980841	31.2285	2.09142	3.88848	0.0016352	0.0496762	Chr5	19634463	19636066	+	1604	-
LOC_Os03g21380	629.932	894.388	608.81	445.727	234.623	182.436	711.043	287.596	1.30601	0.00163858	0.0496937	Chr3	12223886	12226100	-	2215	EF-hand domain
LOC_Os02g44980	11725.4	8740.1	10785	7203.1	5471.42	4915.97	10416.8	5863.5	0.829075	0.00163944	0.0496937	Chr2	27244828	27246981	+	2154	-
LOC_Os03g20550	217.767	139.973	201.809	107.2	43.512	42.1761	186.517	64.2961	1.53691	0.00164772	0.0498363	Chr3	11650824	11652144	+	1249	WRKY domain
LOC_Os04g56110	4953.41	2334.26	814.002	858.542	574.187	115.739	2700.56	516.156	2.3873	0.00165071	0.0498363	Chr4	33418505	33421204	+	2700	Serine-threonine/tyrosine-protein kinase, catalytic domain
LOC_Os01g52790	433.41	599.003	191.662	148.576	122.004	175.57	408.025	148.717	1.45695	0.00165089	0.0498363	Chr1	30372204	30376917	-	2102	Cytochrome P450

## Sheet: down
Table S2. Differentially expressed genes in panicles at the S9 stage between osccr18 mutants and WT plants
gene_id	ccr18_1	ccr18_2	ccr18_3	WT_1	WT_2	WT_3	ccr18	WT	log2FoldChange	pvalue	padj	gene_chr	gene_start	gene_end	gene_strand	gene_length	gene_description
LOC_Os01g57082	0	0	0	461.713	415.497	397.24	0	424.817	-11.0728	9.71821e-20	3.29921e-16	Chr1	32984982	32994519	+	3125	Metalloenzyme, LuxS/M16 peptidase-like
LOC_Os02g29150	37.1798	66.899	15.784	367.678	466.687	476.689	39.9543	437.018	-3.44748	6.8659e-12	7.76962e-09	Chr2	17271183	17275865	-	3070	F-box domain
LOC_Os03g29190	861.509	750.298	942.528	1887.29	2185.84	2504.09	851.445	2192.4	-1.36465	5.09136e-09	3.45691e-06	Chr3	16590187	16595991	+	2198	-
LOC_Os11g32580	2.12456	3.08765	9.01941	46.0773	98.1152	158.896	4.74387	101.03	-4.42556	8.0316e-09	5.0728e-06	Chr11	19226735	19228499	-	1542	Thiolase-like
LOC_Os12g21784	33.993	36.0225	39.4599	132.59	156.131	126.528	36.4918	138.416	-1.92492	8.8278e-09	5.44896e-06	Chr12	12258432	12262067	-	3080	-
LOC_Os11g27264	15.9342	13.3798	19.1662	78.0492	124.564	294.252	16.1601	165.622	-3.35852	2.93609e-08	1.62737e-05	Chr11	15683051	15694877	+	2123	Peptidase S10, serine carboxypeptidase
LOC_Os03g64340	96.6675	119.389	113.87	372.379	283.254	299.156	109.975	318.263	-1.53279	3.35381e-08	1.786e-05	Chr3	36366368	36367770	-	1194	Heavy metal-associated domain, HMA
LOC_Os04g28420	105.166	100.863	81.1747	244.492	882.184	885.699	95.7345	670.792	-2.80851	4.45604e-08	2.24114e-05	Chr4	16813848	16817974	-	2218	Tetratricopeptide-like helical domain
LOC_Os02g06770	9.56052	2.05843	0	83.6913	77.639	84.3523	3.87298	81.8942	-4.39247	7.18564e-08	3.42377e-05	Chr2	3415481	3418462	-	887	-
LOC_Os12g05040	622.496	835.723	580.625	1658.78	1784.84	1610.54	679.614	1684.72	-1.30949	9.27376e-08	4.0784e-05	Chr12	2193733	2198850	+	3647	Heavy metal-associated domain, HMA
LOC_Os03g21960	165.716	180.113	144.311	502.148	469.247	940.626	163.38	637.34	-1.96319	1.18479e-07	5.01623e-05	Chr3	12556845	12559702	-	2100	Aminotransferase class-III
novel.1146	1.06228	0	1.12743	141.053	13.6508	115.739	0.729902	90.1476	-6.97017	2.47946e-07	8.86047e-05	Chr9	4049778	4052360	+	2153	-
LOC_Os04g27190	69.0482	111.155	76.665	315.018	249.127	255.019	85.6228	273.055	-1.67185	2.94625e-07	0.000103919	Chr4	16057927	16068256	-	2990	Terpene synthase, metal-binding domain
LOC_Os02g06779	1.06228	0	0	34.793	34.127	48.0612	0.354093	38.9938	-6.66466	6.75877e-07	0.000213448	Chr2	3420172	3423446	-	728	-
LOC_Os07g39450	1.06228	0	0	250.134	4.26588	73.563	0.354093	109.321	-8.15241	9.889e-07	0.000296954	Chr7	23632873	23633411	+	450	-
LOC_Os11g09830	3.18684	3.08765	2.25485	207.818	7.67858	96.1224	2.84311	103.873	-5.18799	1.59919e-06	0.000425807	Chr11	5258104	5259504	-	1401	-
LOC_Os01g19190	28.6816	12.3506	15.784	51.7194	209.028	329.562	18.9387	196.77	-3.37699	1.67586e-06	0.000441891	Chr1	10853801	10859425	+	5553	Ribonuclease H-like domain
LOC_Os02g52840	26.557	18.5259	18.0388	128.828	68.2541	310.926	21.0406	169.336	-3.00733	1.83385e-06	0.000469863	Chr2	32310799	32312184	-	1221	Oxoglutarate/iron-dependent dioxygenase
LOC_Os02g54060	89.2315	86.4541	101.468	188.07	447.064	487.478	92.3847	374.204	-2.01847	3.053e-06	0.000679644	Chr2	33114780	33117303	-	1112	GroES chaperonin family
LOC_Os12g44010	0	3.08765	1.12743	292.45	5.97223	50.0229	1.40502	116.148	-6.35868	4.06182e-06	0.000861836	Chr12	27300280	27302714	-	2435	Purple acid phosphatase-like, N-terminal
LOC_Os11g04660	31.8684	26.7596	30.4405	78.9896	114.326	153.992	29.6895	115.769	-1.96327	5.04584e-06	0.00102269	Chr11	1986480	1988225	+	1164	Strictosidine synthase, conserved region
LOC_Os08g06550	826.454	1057	1089.09	1794.19	2608.16	2746.35	990.851	2382.9	-1.26602	5.94011e-06	0.00117757	Chr8	3698312	3700553	-	669	-
LOC_Os06g28820	92.4184	68.9574	60.881	213.46	215	467.861	74.0856	298.774	-2.01083	6.17331e-06	0.00121493	Chr6	16400699	16432410	-	5189	PFTB repeat
LOC_Os03g14700	14.8719	14.409	12.4017	80.8703	46.0715	74.5439	13.8942	67.1619	-2.27032	6.26033e-06	0.0012232	Chr3	7989864	7994679	-	1815	Synaptotagmin-like mitochondrial-lipid-binding domain
LOC_Os03g26620	8.49824	18.5259	9.01941	60.1825	56.3096	129.471	12.0145	81.9877	-2.765	7.31504e-06	0.00137013	Chr3	15208874	15210724	+	1851	FAE1/Type III polyketide synthase-like protein
LOC_Os02g17620	2.12456	14.409	14.6565	75.2282	60.5755	248.153	10.3967	127.985	-3.62225	7.76473e-06	0.0014444	Chr2	10135285	10143837	-	952	Isochorismatase-like
LOC_Os11g10870	290.002	590.769	317.934	1314.61	1000.78	1461.45	399.569	1258.95	-1.65526	8.27461e-06	0.00150826	Chr11	5996508	5997541	+	1034	-
LOC_Os05g12640	22.3079	273.771	82.3021	1809.24	366.013	3879.22	126.127	2018.16	-3.99965	8.78244e-06	0.00156923	Chr5	7255509	7257332	+	1561	-
LOC_Os05g03120	158.28	180.113	145.438	328.183	353.215	331.524	161.277	337.641	-1.06542	9.17344e-06	0.00161145	Chr5	1240299	1245353	+	2366	-
LOC_Os06g09520	0	3.08765	0	50.779	17.9167	57.8696	1.02922	42.1884	-5.31728	9.27804e-06	0.00161527	Chr6	4839628	4840128	+	501	-
LOC_Os02g06754	15.9342	0	2.25485	131.649	70.8136	143.203	6.06302	115.222	-4.24718	1.00196e-05	0.00171147	Chr2	3408024	3409076	+	823	-
LOC_Os11g38010	598.064	494.023	854.589	1569.45	1751.57	3411.36	648.892	2244.13	-1.79021	1.05375e-05	0.00175128	Chr11	22550213	22554890	+	1894	TPX2, C-terminal
LOC_Os07g32340	301.688	245.982	311.17	593.362	1029.78	2227.49	286.28	1283.54	-2.16463	1.07279e-05	0.00175517	Chr7	19223928	19230480	+	2918	-
LOC_Os05g02820	365.424	471.381	483.666	875.468	1106.57	1712.55	440.157	1231.53	-1.4843	1.27924e-05	0.00199672	Chr5	1013986	1017612	-	3040	-
LOC_Os05g07060	450.407	34.9933	192.79	959.159	1535.72	8067.41	226.063	3520.76	-3.96113	1.30498e-05	0.002023	Chr5	3715762	3716891	-	1130	-
LOC_Os07g06834	5.3114	0	2.25485	4155.42	3.4127	1037.73	2.52208	1732.19	-9.42512	1.31097e-05	0.002023	Chr7	3339384	3340631	+	1248	-
LOC_Os08g35090	110.477	155.411	82.3021	267.06	407.818	367.815	116.064	347.564	-1.5813	1.41053e-05	0.0021165	Chr8	22111063	22113871	+	2809	Peptidase S8/S53 domain
LOC_Os12g31510	15.9342	14.409	11.2743	56.4211	50.3374	77.4864	13.8725	61.415	-2.14273	1.51607e-05	0.00225	Chr12	18954678	18955772	+	999	-
novel.1005	6.37368	12.3506	9.01941	38.5544	50.3374	176.551	9.24789	88.481	-3.25556	1.64352e-05	0.00236568	Chr7	2663180	2664167	-	988	-
LOC_Os10g40130	218.83	233.632	206.319	415.636	551.152	426.666	219.594	464.484	-1.08097	1.8868e-05	0.00260774	Chr10	21482733	21486316	-	2529	Mur ligase, central
LOC_Os01g62490	22.3079	41.1686	22.5485	143.874	74.2263	245.21	28.675	154.437	-2.42625	1.95594e-05	0.00265606	Chr1	36177289	36180127	-	2213	Multicopper oxidase, type 1
LOC_Os02g06760	10.6228	0	0	111.902	64.8414	86.314	3.54093	87.6858	-4.62579	2.08624e-05	0.00280496	Chr2	3411220	3415305	+	649	-
LOC_Os07g13770	98.792	91.6001	89.0667	182.428	255.1	339.371	93.153	258.966	-1.47465	2.1944e-05	0.00290205	Chr7	7900573	7902417	+	1620	UDP-glucuronosyl/UDP-glucosyltransferase
LOC_Os07g01370	97.7298	72.0451	25.9308	278.344	210.734	1200.55	65.2352	563.209	-3.10893	2.20119e-05	0.00290205	Chr7	235903	237446	+	1469	Haem peroxidase
LOC_Os12g03840	0	0	0	15.0456	11.9445	30.4061	0	19.1321	-6.59818	2.33267e-05	0.00301936	Chr12	1573521	1574733	+	1077	-
LOC_Os01g47370	5.3114	2.05843	0	12.2246	39.2461	209.9	2.45661	87.1235	-5.13869	2.33807e-05	0.00301936	Chr1	27063892	27064167	-	276	-
LOC_Os03g41200	423.85	502.257	402.491	783.313	941.053	850.389	442.866	858.252	-0.954367	2.45284e-05	0.00309845	Chr3	22911337	22918539	-	2797	-
LOC_Os02g34710	42.4912	46.3147	43.9696	111.902	174.048	110.835	44.2585	132.262	-1.58051	2.49312e-05	0.00312031	Chr2	20823478	20824900	-	1354	-
LOC_Os05g06110	161.467	119.389	155.585	318.779	456.449	1087.75	145.48	620.994	-2.09371	2.55314e-05	0.00318077	Chr5	3050776	3057026	+	3260	-
novel.98	32.9307	30.8765	34.9502	80.8703	106.647	100.046	32.9191	95.8543	-1.54321	2.65631e-05	0.00327921	Chr1	12595247	12597718	-	2001	PF12937:F-box-like|PF03478:Protein of unknown function (DUF295)
LOC_Os06g21360	8.49824	6.17529	6.76456	46.0773	25.5953	159.877	7.14603	77.1832	-3.43167	2.67486e-05	0.00328718	Chr6	12333262	12337541	+	1845	Cation/H+ exchanger
LOC_Os03g06674	0	0	0	9.40352	23.0358	23.5402	0	18.6598	-6.56428	2.69701e-05	0.00329947	Chr3	3378425	3379340	-	916	-
LOC_Os01g72230	108.353	73.0743	78.9198	203.116	238.036	435.493	86.7822	292.215	-1.75104	2.73115e-05	0.00331445	Chr1	41882488	41886410	+	1784	Arf GTPase activating protein
LOC_Os04g28990	296.376	221.281	199.554	525.657	772.124	2158.83	239.071	1152.2	-2.26868	2.73367e-05	0.00331445	Chr4	17180207	17183520	+	1249	Alcohol dehydrogenase, N-terminal
LOC_Os02g29140	0	2.05843	0	38.5544	14.504	50.0229	0.686143	34.3604	-5.60093	2.83145e-05	0.00340263	Chr2	17257940	17266066	-	1779	Tetratricopeptide-like helical domain
LOC_Os06g38960	246.449	74.1035	124.017	510.611	489.723	1645.85	148.19	882.062	-2.57336	3.13682e-05	0.003688	Chr6	23119058	23122451	+	1707	-
LOC_Os02g21550	29.7438	51.4608	37.2051	102.498	135.655	275.616	39.4699	171.257	-2.11581	3.4562e-05	0.00397741	Chr2	12788668	12790809	+	1319	Oxoglutarate/iron-dependent dioxygenase
LOC_Os05g37350	223.079	166.733	140.928	348.871	745.676	513.96	176.913	536.169	-1.59967	3.59351e-05	0.00403459	Chr5	21843770	21856444	-	5544	DNA glycosylase
LOC_Os03g02040	266.632	71.0158	153.33	535.06	575.894	2267.7	163.659	1126.22	-2.78274	3.60987e-05	0.00403459	Chr3	646947	649469	-	1090	-
LOC_Os02g42060	22.3079	4.11686	6.76456	68.6457	52.0437	231.478	11.0631	117.389	-3.40633	3.8243e-05	0.00422213	Chr2	25286937	25287918	-	550	Signal transduction response regulator, receiver domain
LOC_Os02g37800	1137.7	857.336	537.782	2002.95	2469.09	5920.35	844.273	3464.13	-2.03659	3.85269e-05	0.00423624	Chr2	22805645	22808522	-	1745	Lecithin:cholesterol/phospholipid:diacylglycerol acyltransferase
LOC_Os01g57050	29.7438	13.3798	15.784	71.4668	73.3731	217.747	19.6359	120.862	-2.62066	4.13159e-05	0.00443517	Chr1	32947994	32949231	-	1131	-
LOC_Os08g01030	8.49824	13.3798	11.2743	270.821	23.0358	77.4864	11.0508	123.781	-3.48468	4.4858e-05	0.00474046	Chr8	18912	24200	-	1385	Zinc/iron permease
LOC_Os01g65500	31.8684	27.7888	18.0388	126.007	59.7223	236.383	25.8987	140.704	-2.43912	4.624e-05	0.00484878	Chr1	38017450	38022111	+	2956	Chloride channel, core
LOC_Os03g11600	618.247	923.206	933.509	1546.88	1888.08	1894	824.987	1776.32	-1.10651	4.71389e-05	0.00490516	Chr3	6041245	6048687	+	1022	YABBY protein
LOC_Os02g10300	0	0	1.12743	236.969	0.853176	12.7509	0.375809	83.5243	-7.76423	4.9972e-05	0.00514087	Chr2	5411327	5414291	+	1920	Glycoside hydrolase, family 28
LOC_Os07g40940	440.846	481.673	363.031	898.977	1040.02	2363.83	428.517	1434.27	-1.74265	5.21071e-05	0.00529858	Chr7	24505166	24508963	+	1563	-
LOC_Os10g12750	48.8649	41.1686	27.0582	117.544	106.647	859.216	39.0306	361.136	-3.20894	5.39485e-05	0.00540659	Chr10	7114764	7116172	-	1409	-
LOC_Os06g39390	502.458	251.128	152.203	952.577	788.335	6791.34	301.93	2844.08	-3.23554	5.46156e-05	0.00542815	Chr6	23379156	23381415	-	1728	Transferase
LOC_Os04g43020	181.65	207.901	209.701	387.425	388.195	578.696	199.751	451.439	-1.17598	5.51425e-05	0.00544587	Chr4	25453449	25459806	+	2957	Serine-threonine/tyrosine-protein kinase, catalytic domain
LOC_Os05g50800	49.9272	55.5776	82.3021	185.249	156.984	473.746	62.6023	271.993	-2.11957	5.67042e-05	0.00555968	Chr5	29137463	29140395	+	1541	-
LOC_Os08g08140	192.273	158.499	155.585	372.379	341.27	308.965	168.786	340.872	-1.01398	5.92492e-05	0.00564922	Chr8	4631720	4638679	+	3297	Protein kinase domain
LOC_Os10g36229	0	0	0	21.6281	13.6508	11.7701	0	15.683	-6.31318	6.05997e-05	0.00573459	Chr10	19364008	19373808	+	3729	JAB1/MPN/MOV34 metalloenzyme domain
LOC_Os11g19149	174.214	227.457	186.025	377.081	406.965	583.6	195.899	455.882	-1.21791	6.17096e-05	0.00581934	Chr11	10925275	10926601	+	1327	-
LOC_Os02g40100	424.912	173.937	232.25	733.475	813.93	2497.22	277.033	1348.21	-2.28282	6.25056e-05	0.00587401	Chr2	24276308	24281041	+	3162	-
LOC_Os11g13860	32.9307	46.3147	39.4599	102.498	98.1152	118.682	39.5684	106.432	-1.42617	6.31436e-05	0.00591108	Chr11	7644120	7649680	+	2934	Protein kinase domain
LOC_Os10g36060	671.361	627.821	635.868	1226.22	1379.59	2579.61	645.017	1728.47	-1.42197	6.3553e-05	0.00591108	Chr10	19276101	19281496	+	3719	-
LOC_Os01g23880	5.3114	6.17529	0	257.657	16.2103	34.3294	3.8289	102.732	-4.73634	6.43298e-05	0.00595623	Chr1	13442496	13443696	+	1201	-
LOC_Os02g49510	36.1175	31.9057	16.9114	57.3615	207.322	183.417	28.3115	149.367	-2.39786	6.59162e-05	0.00602767	Chr2	30259433	30263507	-	2138	-
LOC_Os01g72650	46.7403	21.6135	49.6068	87.4528	206.469	215.785	39.3202	169.902	-2.11331	6.86068e-05	0.00625266	Chr1	42149710	42156852	+	2380	RNA recognition motif domain
LOC_Os02g37770	158.28	117.331	219.848	356.393	447.064	780.749	165.153	528.069	-1.67738	7.43237e-05	0.00661822	Chr2	22790088	22790942	-	855	Lecithin:cholesterol/phospholipid:diacylglycerol acyltransferase
LOC_Os11g41380	28.6816	16.4674	24.8034	161.741	73.3731	70.6205	23.3175	101.911	-2.1288	7.56987e-05	0.00671863	Chr11	24833106	24836792	+	1968	-
LOC_Os01g29150	31.8684	40.1394	29.3131	72.4071	122.004	154.973	33.7736	116.461	-1.78427	7.6406e-05	0.00673737	Chr1	16325487	16328374	-	2143	Cytochrome P450
LOC_Os01g46950	44.6158	64.8406	66.5182	121.305	172.342	189.302	58.6582	160.983	-1.45688	7.82767e-05	0.0068578	Chr1	26791754	26795939	-	1899	Galactose mutarotase-like domain
LOC_Os12g05120	140.221	165.704	128.527	269.881	356.628	297.195	144.817	307.901	-1.08798	7.95379e-05	0.00689162	Chr12	2251184	2254077	-	2799	Protein kinase domain
LOC_Os10g05880	0	0	1.12743	66.765	5.97223	22.5593	0.375809	31.7655	-6.36868	7.96778e-05	0.00689162	Chr10	2966920	2967721	-	699	-
LOC_Os11g27329	174.214	117.331	179.261	315.018	417.203	748.381	156.935	493.534	-1.65313	8.12953e-05	0.00692131	Chr11	15706797	15738377	+	5353	Peptidase S10, serine carboxypeptidase
LOC_Os04g53760	498.209	272.742	397.981	938.472	956.41	2899.36	389.644	1598.08	-2.03608	8.24925e-05	0.00698932	Chr4	32033885	32039122	-	3200	Kinesin motor domain
LOC_Os08g22604	1.06228	4.11686	7.89198	50.779	216.707	8.82756	4.35704	92.1044	-4.40876	8.26088e-05	0.00698932	Chr8	13603168	13604269	-	927	-
LOC_Os06g01890	4.24912	6.17529	2.25485	24.4492	35.8334	34.3294	4.22642	31.5373	-2.88979	8.29487e-05	0.00699628	Chr6	494850	511406	+	1015	Transcription factor, MADS-box
LOC_Os04g43290	405.791	571.214	401.364	1260.07	915.458	3260.31	459.456	1811.95	-1.97934	8.35057e-05	0.00699979	Chr4	25608130	25611089	-	1849	Arp2/3 complex subunit 2/4
LOC_Os01g55280	389.857	509.461	197.3	815.285	1190.18	1870.46	365.539	1291.98	-1.82106	8.74752e-05	0.00728754	Chr1	31815517	31816881	-	1189	-
LOC_Os11g18366	1617.85	1431.64	2131.96	3130.43	3790.66	5649.64	1727.15	4190.25	-1.27868	9.63869e-05	0.00790868	Chr11	10352224	10376611	-	2845	Squalene cyclase, N-terminal
LOC_Os03g01270	2.12456	9.26294	24.8034	53.6001	406.965	56.8888	12.0636	172.485	-3.84244	9.91081e-05	0.00808311	Chr3	189333	191297	+	1418	-
LOC_Os08g15060	186.961	155.411	244.652	496.506	378.81	826.849	195.675	567.388	-1.53601	0.000100204	0.00813907	Chr8	9101238	9105746	-	2542	Protein kinase domain
LOC_Os12g13100	86.0447	116.301	111.615	234.148	200.496	276.597	104.654	237.08	-1.17914	0.000100393	0.00813907	Chr12	7285912	7287583	+	1621	-
LOC_Os03g12680	161.467	110.126	89.0667	320.66	268.75	669.914	120.22	419.775	-1.80317	0.000101514	0.00815688	Chr3	6762982	6767685	-	1861	Protein kinase domain
LOC_Os02g50640	423.85	678.253	582.879	1053.19	1325.84	2112.73	561.661	1497.25	-1.41442	0.000106919	0.00841777	Chr2	30930066	30934291	-	2665	Armadillo-type fold
LOC_Os03g11140	16.9965	42.1978	32.6954	129.769	145.893	77.4864	30.6299	117.716	-1.94248	0.000107526	0.00841777	Chr3	5735001	5746233	+	3548	Rho GTPase activation protein
LOC_Os12g04424	31.8684	50.4315	55.2439	106.26	139.921	261.884	45.8479	169.355	-1.88505	0.000107732	0.00841777	Chr12	1882578	1888289	+	3685	Strictosidine synthase, conserved region
LOC_Os10g29240	112.602	116.301	129.654	218.162	238.036	276.597	119.519	244.265	-1.03138	0.000109803	0.00849612	Chr10	15220658	15223120	-	2310	-
LOC_Os01g21970	91.3561	116.301	73.2827	1036.27	318.235	177.532	93.6467	510.678	-2.44671	0.000110708	0.00853937	Chr1	12332795	12337227	-	1811	Serine-threonine/tyrosine-protein kinase, catalytic domain
LOC_Os03g59210	4.24912	7.20451	7.89198	31.972	27.3016	85.3331	6.44854	48.2022	-2.90161	0.000110991	0.00853937	Chr3	33717046	33717410	+	195	-
LOC_Os11g42550	88.1692	44.2563	37.2051	81.8106	316.528	952.396	56.5435	450.245	-2.99281	0.000112926	0.00866375	Chr11	25617707	25618704	+	998	-
LOC_Os01g14670	7439.15	3512.71	2537.84	11666	13093.7	42566.5	4496.56	22442.1	-2.3193	0.00011615	0.00886098	Chr1	8203765	8206969	-	1106	Cupin 1
LOC_Os11g17600	90.2938	135.856	137.546	223.804	333.592	357.026	121.232	304.807	-1.33036	0.00012076	0.0091033	Chr11	9794908	9810269	+	3607	Exocyst complex component Sec3, C-terminal
LOC_Os10g33550	111.539	130.71	143.183	321.6	220.973	320.735	128.478	287.769	-1.16312	0.000131173	0.0098141	Chr10	17687944	17689221	-	534	-
LOC_Os01g07560	94.5429	66.899	149.948	213.46	354.921	673.837	103.797	414.073	-1.99684	0.000133142	0.00993409	Chr1	3621211	3625356	+	4026	Protein kinase domain
LOC_Os08g09230	296.376	357.138	400.236	561.39	920.577	996.534	351.25	826.167	-1.2341	0.000134012	0.00995614	Chr8	5352105	5363367	+	5768	Starch synthase, catalytic domain
LOC_Os02g26600	16.9965	4.11686	12.4017	40.4351	69.9604	74.5439	11.1717	61.6465	-2.46785	0.000134171	0.00995614	Chr2	15614928	15619328	-	3141	-
LOC_Os11g28184	58.4254	74.1035	62.0084	129.769	158.691	238.344	64.8458	175.601	-1.43606	0.000146283	0.0105382	Chr11	16205853	16214048	+	4131	-
LOC_Os01g50750	211.394	130.71	191.662	482.401	357.481	1290.79	177.922	710.223	-1.99695	0.000151455	0.0108813	Chr1	29152619	29154853	+	1568	-
LOC_Os11g17504	567.258	491.965	627.976	860.422	1589.47	2003.86	562.4	1484.58	-1.40046	0.000152971	0.010933	Chr11	9754959	9759871	+	1066	-
LOC_Os12g12470	191.21	187.317	94.7038	376.141	407.818	1193.68	157.744	659.214	-2.06248	0.000155339	0.0110153	Chr12	6869983	6872480	+	1541	Alcohol dehydrogenase, C-terminal
LOC_Os02g20850	25.4947	37.0517	15.784	82.751	76.7858	180.475	26.1101	113.337	-2.11388	0.00015783	0.0111628	Chr2	12324547	12326744	-	904	Small GTPase superfamily
LOC_Os01g51840	81.7956	118.36	156.712	273.643	295.199	702.282	118.956	423.708	-1.83277	0.00016521	0.0115339	Chr1	29801081	29806970	-	2904	-
LOC_Os11g09460	1.06228	4.11686	2.25485	132.59	3.4127	44.1378	2.478	60.0467	-4.59394	0.000165821	0.0115339	Chr11	5073932	5074811	-	732	-
LOC_Os09g31080	19052	17216.7	11991.3	23938.5	56788.2	70547	16086.7	50424.6	-1.64826	0.000166053	0.0115339	Chr9	18685679	18686940	+	1116	-
LOC_Os10g40620	520.517	242.895	315.679	907.44	836.113	3408.42	359.697	1717.32	-2.25523	0.000167047	0.0115381	Chr10	21787626	21790246	-	1825	-
LOC_Os08g28870	73.2973	108.068	64.2633	545.404	170.635	234.421	81.8761	316.82	-1.95119	0.000169925	0.011654	Chr8	17650554	17653886	-	3265	Protein kinase domain
LOC_Os08g37150	22.3079	24.7012	32.6954	89.3335	61.4287	194.206	26.5681	114.99	-2.11366	0.000175337	0.0118752	Chr8	23475341	23476368	+	1028	-
LOC_Os05g11810	591.69	819.255	798.218	1205.53	1566.43	1787.09	736.388	1519.68	-1.04523	0.000177362	0.0119753	Chr5	6720998	6726973	-	2846	Oxoglutarate/iron-dependent dioxygenase
LOC_Os04g08280	14.8719	17.4967	11.2743	17.8667	63.135	505.133	14.5476	195.378	-3.74604	0.000177696	0.0119753	Chr4	4419176	4421142	-	1209	-
LOC_Os01g18050	2326.39	2503.05	2956.11	4281.42	6205.15	10904	2595.19	7130.19	-1.4581	0.000180092	0.0120768	Chr1	10098282	10103021	-	2913	Tubulin/FtsZ, GTPase domain
LOC_Os06g12820	74.3596	34.9933	112.743	104.379	284.961	1848.88	74.0318	746.075	-3.33355	0.000183648	0.0122081	Chr6	7005872	7008652	-	1873	-
LOC_Os02g34870	7.43596	6.17529	6.76456	22.5685	38.3929	57.8696	6.79194	39.6103	-2.54351	0.000185014	0.0122081	Chr2	20919649	20920293	-	645	-
LOC_Os02g47420	316.559	427.124	341.61	586.78	836.966	1043.61	361.765	822.453	-1.18463	0.00019396	0.0127549	Chr2	28952897	28959125	-	3117	PRONE domain
LOC_Os02g25960	180.588	95.717	108.233	284.927	325.06	733.669	128.179	447.885	-1.80461	0.000198659	0.0130323	Chr2	15233137	15238844	-	2776	-
LOC_Os05g05354	303.812	216.135	207.446	404.351	816.489	640.489	242.465	620.443	-1.35562	0.000204657	0.0132373	Chr5	2638849	2649055	-	2577	-
LOC_Os01g63200	3.18684	0	0	15.986	4.26588	178.513	1.06228	66.2549	-5.95619	0.000206424	0.0132536	Chr1	36634331	36636980	+	1928	Multicopper oxidase, type 3
LOC_Os09g34320	1051.66	975.696	863.609	2157.17	1842.86	6136.14	963.654	3378.72	-1.80981	0.000209324	0.0133139	Chr9	20258416	20260196	-	1781	-
LOC_Os07g35610	240.075	414.774	367.541	628.155	1009.31	786.634	340.797	808.032	-1.24563	0.000222809	0.0137909	Chr7	21315434	21320392	-	2232	Kelch repeat type 1
LOC_Os01g09880	1633.79	1052.89	844.442	3478.36	2069.81	9110.05	1177.04	4886.07	-2.05345	0.000228889	0.0139701	Chr1	5131471	5132918	-	1448	-
LOC_Os02g37700	157.217	179.083	102.596	378.962	272.163	432.551	146.299	361.225	-1.30258	0.000228899	0.0139701	Chr2	22756410	22758226	-	1526	Lecithin:cholesterol/phospholipid:diacylglycerol acyltransferase
LOC_Os03g60340	926.308	746.181	569.35	2065.01	1295.12	5542.73	747.28	2967.62	-1.98948	0.000229801	0.0139907	Chr3	34311081	34314802	-	1703	-
LOC_Os11g05290	26.557	98.8047	131.909	263.299	277.282	1022.04	85.7568	520.872	-2.60286	0.000230268	0.0139907	Chr11	2343616	2344713	-	758	-
LOC_Os01g41010	570.444	567.098	653.907	1136.89	1104.86	2225.53	597.15	1489.09	-1.31819	0.000236214	0.01432	Chr1	23224233	23226650	+	1536	-
LOC_Os02g30380	106.228	99.8339	105.978	179.607	291.786	599.294	104.013	356.896	-1.77845	0.000236785	0.0143226	Chr2	18091902	18093020	+	1119	-
LOC_Os06g13600	503.521	368.459	458.862	762.626	929.962	1465.38	443.614	1052.65	-1.24661	0.000247224	0.0146922	Chr6	7530834	7534857	+	2421	Armadillo-type fold
LOC_Os11g26990	142.346	129.681	257.053	246.372	874.505	1144.64	176.36	755.173	-2.0987	0.000263197	0.0152739	Chr11	15531380	15533837	-	2458	-
LOC_Os10g02340	23.3702	26.7596	15.784	49.8387	80.1985	136.337	21.9712	88.7914	-2.01166	0.00026686	0.0154534	Chr10	836753	838994	+	1671	Proton-dependent oligopeptide transporter family
LOC_Os06g19610	1.06228	1.02922	3.38228	17.8667	18.7699	28.4444	1.82459	21.6936	-3.58939	0.000267504	0.0154578	Chr6	11179549	11181352	-	972	-
LOC_Os07g18154	311.248	183.2	228.868	571.734	476.925	1363.37	241.105	804.009	-1.73737	0.000272022	0.0156855	Chr7	10748746	10760848	+	3097	FAD-binding, type 2
LOC_Os03g18370	176.338	106.009	130.781	394.948	245.715	875.891	137.71	505.518	-1.87583	0.000274613	0.0157319	Chr3	10292291	10295670	-	2018	Serine-threonine/tyrosine-protein kinase, catalytic domain
LOC_Os11g36940	0	5.14608	2.25485	16.9263	22.1826	84.3523	2.46698	41.1537	-4.05138	0.000274939	0.0157319	Chr11	21790085	21791579	+	1495	Glycoside hydrolase family 17
LOC_Os02g01380	546.012	662.815	683.22	986.429	1157.76	1232.92	630.682	1125.7	-0.835898	0.000275145	0.0157319	Chr2	219577	221707	-	2131	-
LOC_Os01g15320	332.494	385.956	257.053	623.454	743.116	1880.27	325.168	1082.28	-1.73449	0.000279148	0.0159273	Chr1	8577199	8577934	-	736	-
LOC_Os03g17500	261.321	310.823	200.682	527.538	509.346	1024.98	257.609	687.287	-1.4151	0.000285673	0.0161637	Chr3	9725271	9727544	-	1417	-
LOC_Os10g40920	113.664	117.331	109.36	181.488	375.397	294.252	113.452	283.713	-1.32269	0.00029328	0.0164911	Chr10	21983939	21987321	+	3383	DYW domain
LOC_Os11g09200	0	0	0	214.4	2.55953	73.563	0	96.841	-8.93949	0.00029575	0.0165211	Chr11	4934652	4937550	+	1068	-
LOC_Os04g52880	59.4877	161.587	127.399	228.506	552.005	437.455	116.158	405.988	-1.80539	0.00029581	0.0165211	Chr4	31492746	31494163	+	693	-
LOC_Os02g30200	7.43596	13.3798	7.89198	81.8106	50.3374	25.5019	9.56925	52.55	-2.45451	0.000303915	0.0167869	Chr2	17952229	17957190	-	1164	Fatty acid desaturase, type 2
LOC_Os05g07140	135.972	132.769	122.889	221.923	255.953	325.639	130.543	267.838	-1.03618	0.000308038	0.0169352	Chr5	3772400	3773192	+	793	-
LOC_Os03g01980	216.705	257.304	235.632	349.811	1099.74	699.339	236.547	716.298	-1.59862	0.000311413	0.0170505	Chr3	609881	614456	+	1611	Protein Networked (NET), actin-binding (NAB) domain
LOC_Os07g01620	70.1105	29.8472	25.9308	86.5124	160.397	489.439	41.9628	245.45	-2.54738	0.000312762	0.0170568	Chr7	383526	385000	+	1122	-
LOC_Os05g28830	80.7333	75.1327	74.4101	115.663	269.604	522.788	76.7587	302.685	-1.97909	0.000319164	0.0173364	Chr5	16896980	16899135	-	2004	-
LOC_Os05g02520	6284.45	4374.16	3703.6	7719.35	13789	12568.5	4787.4	11359	-1.24651	0.000322521	0.0174489	Chr5	872979	876122	-	1731	Cupin 1
LOC_Os02g37780	36.1175	47.3439	62.0084	91.2142	156.131	202.053	48.49	149.8	-1.62824	0.000329748	0.0177339	Chr2	22791279	22791686	-	408	-
LOC_Os02g24430	5.3114	9.26294	2.25485	86.5124	20.4762	34.3294	5.60973	47.106	-3.06059	0.0003312	0.0177743	Chr2	14161319	14171782	+	2214	-
LOC_Os02g54030	203.958	188.346	186.025	356.393	433.413	1114.23	192.776	634.681	-1.71881	0.000334029	0.017858	Chr2	33097336	33098858	+	1193	Glycoside hydrolase, family 28
LOC_Os01g54620	4719.71	2197.37	2266.13	6673.68	7315.13	23960	3061.07	12649.6	-2.04697	0.000337045	0.0179839	Chr1	31422946	31428688	+	3479	Cellulose synthase
LOC_Os04g44500	28.6816	52.49	38.3325	139.172	76.7858	191.264	39.8347	135.741	-1.76675	0.000349076	0.0185167	Chr4	26342443	26343781	-	1112	-
LOC_Os06g49690	58.4254	49.4023	48.4793	87.4528	169.782	211.862	52.1024	156.365	-1.58517	0.00035294	0.0186281	Chr6	30066045	30066843	-	799	-
LOC_Os11g41365	35.0552	22.6427	41.7148	128.828	87.8771	80.4289	33.1376	99.0448	-1.58212	0.000353831	0.0186281	Chr11	24825414	24829197	-	3784	-
LOC_Os01g69290	207.145	329.349	276.219	531.299	499.961	712.09	270.904	581.117	-1.10063	0.000354954	0.0186464	Chr1	40285366	40287178	-	1813	-
LOC_Os07g32620	273.006	269.654	179.261	453.25	549.445	1250.57	240.64	751.089	-1.64163	0.000363096	0.0189641	Chr7	19454491	19456170	-	1680	UDP-glucuronosyl/UDP-glucosyltransferase
LOC_Os03g01240	72.235	96.7462	116.125	195.593	196.23	293.271	95.0354	228.365	-1.26497	0.00036564	0.0190603	Chr3	152358	170125	+	6314	CCR4-Not complex component, Not1, C-terminal
LOC_Os01g50470	27.6193	36.0225	22.5485	132.59	66.5477	80.4289	28.7301	93.1888	-1.6948	0.000366453	0.0190661	Chr1	28978119	28983868	+	3727	FYVE zinc finger
LOC_Os02g07410	330.369	295.385	269.455	425.98	894.128	1365.33	298.403	895.146	-1.58471	0.000371742	0.0192674	Chr2	3827674	3830184	+	1376	-
LOC_Os04g36740	18.0588	8.23372	6.76456	33.8527	46.0715	122.605	11.019	67.5098	-2.61219	0.000377319	0.0194452	Chr4	22192042	22197439	-	2498	-
LOC_Os03g16290	32.9307	24.7012	12.4017	57.3615	73.3731	318.773	23.3445	149.836	-2.67994	0.000380033	0.019511	Chr3	8983003	8984181	+	1012	-
LOC_Os04g46660	19.121	18.5259	11.2743	21.6281	75.0795	345.256	16.3071	147.321	-3.17362	0.000384603	0.0196343	Chr4	27661549	27662832	+	1284	Cyclin PHO80-like
LOC_Os07g05470	652.24	802.788	638.123	1084.23	1682.46	2988.62	697.717	1918.44	-1.45909	0.000394442	0.0199863	Chr7	2539293	2545733	+	3005	-
LOC_Os03g45920	444.033	515.637	440.824	976.086	873.652	2900.35	466.831	1583.36	-1.76185	0.000395696	0.0200125	Chr3	25942717	25946741	+	1844	Tubulin/FtsZ, GTPase domain
LOC_Os02g46830	322.933	165.704	102.596	521.895	461.568	1877.33	197.078	953.598	-2.27426	0.000405663	0.0202526	Chr2	28578314	28579176	+	750	-
LOC_Os11g02130	786.087	274.8	409.256	1394.54	964.942	4624.66	490.048	2328.05	-2.24808	0.000415159	0.020613	Chr11	583135	585659	+	1305	Haem peroxidase
LOC_Os09g26260	337.805	590.769	301.023	534.12	2032.27	2137.25	409.866	1567.88	-1.93544	0.000423451	0.0209863	Chr9	15868298	15870031	-	1734	AAA-type ATPase, N-terminal domain
novel.768	0	0	0	47.0176	5.97223	3.92336	0	18.9711	-6.58736	0.000434625	0.0213337	Chr4	35480654	35481804	-	1002	PF00034:Cytochrome c
LOC_Os05g48270	895.502	334.495	287.494	1483.88	1084.39	5039.56	505.83	2535.94	-2.32569	0.000439664	0.0214763	Chr5	27666326	27669442	+	1554	-
LOC_Os03g07250	11.6851	7.20451	6.76456	13.1649	28.1548	297.195	8.55138	112.838	-3.72067	0.000441704	0.0215372	Chr3	3701751	3704082	-	2037	Cytochrome P450
LOC_Os01g22230	123.224	66.899	114.997	156.098	436.826	415.876	101.707	336.267	-1.72585	0.00044921	0.0217859	Chr1	12499923	12504215	+	1499	Haem peroxidase
LOC_Os01g06040	0	0	3.38228	78.9896	21.3294	7.84672	1.12743	36.0552	-5.03553	0.000454106	0.021906	Chr1	2887060	2888434	-	927	-
LOC_Os12g13340	331.431	441.533	363.031	591.482	807.958	749.362	378.665	716.267	-0.919497	0.000467234	0.0224522	Chr12	7441028	7446103	-	3658	-
LOC_Os09g26999	48.8649	39.1102	27.0582	58.3018	194.524	215.785	38.3444	156.204	-2.02544	0.000471961	0.0225802	Chr9	16411151	16415862	+	2686	-
LOC_Os02g53360	20.1833	39.1102	23.676	47.0176	161.25	144.184	27.6565	117.484	-2.08569	0.000472391	0.0225802	Chr2	32666343	32668045	-	861	-
LOC_Os01g06580	1298.11	247.012	544.547	1352.23	2094.55	12032	696.555	5159.58	-2.88894	0.000479882	0.0227404	Chr1	3097346	3098527	-	1182	-
LOC_Os09g28600	378.172	312.881	231.122	666.71	551.152	1208.4	307.392	808.752	-1.39514	0.000480227	0.0227404	Chr9	17399884	17401188	+	1174	-
LOC_Os04g16970	120.038	33.9641	37.2051	208.758	165.516	646.374	63.7356	340.216	-2.41569	0.000480614	0.0227404	Chr4	9291213	9291999	-	787	-
LOC_Os06g42800	385.608	460.059	405.873	838.794	786.628	2548.22	417.18	1391.22	-1.73743	0.000482141	0.022773	Chr6	25727513	25733221	-	2844	Protein kinase domain
LOC_Os04g57350	31.8684	42.1978	27.0582	493.685	116.032	50.0229	33.7082	219.913	-2.70504	0.000491449	0.0231723	Chr4	34138226	34142151	+	2014	EH domain
LOC_Os05g07420	7.43596	16.4674	2.25485	113.783	23.0358	70.6205	8.71942	69.1463	-2.97918	0.000494763	0.0232077	Chr5	3956457	3959190	-	2734	Protein kinase domain
LOC_Os01g67090	1363.97	532.104	512.979	2046.21	1863.34	5578.04	803.017	3162.53	-1.9775	0.000500632	0.0234022	Chr1	38946700	38950827	+	2464	IQ motif, EF-hand binding site
LOC_Os08g19670	71.1728	82.3372	94.7038	126.948	258.512	320.735	82.7379	235.398	-1.50878	0.000509202	0.0236069	Chr8	11773693	11774707	-	1015	-
LOC_Os04g33450	1224.81	631.938	436.314	2175.03	1498.18	5222.98	764.354	2965.4	-1.9558	0.000509379	0.0236069	Chr4	20221230	20223082	-	1324	-
LOC_Os09g36880	3.18684	6.17529	10.1468	6.58247	104.087	102.007	6.50299	70.8925	-3.45028	0.00050962	0.0236069	Chr9	21270652	21272588	-	1463	GDSL lipase/esterase
LOC_Os10g38580	167.84	200.697	126.272	432.562	275.576	985.745	164.936	564.628	-1.7747	0.000513639	0.0236866	Chr10	20589759	20590856	+	1015	Glutathione S-transferase, N-terminal
LOC_Os11g38610	0	6.17529	0	39.4948	30.7143	29.4252	2.05843	33.2114	-3.98696	0.000525513	0.0239903	Chr11	22876399	22884547	+	3509	Tetratricopeptide-like helical domain
LOC_Os09g26290	37.1798	30.8765	33.8228	70.5264	89.5835	202.053	33.9597	120.721	-1.82891	0.000525581	0.0239903	Chr9	15888897	15890074	+	927	-
LOC_Os03g55040	161.467	239.807	234.505	363.916	435.12	534.558	211.926	444.531	-1.06865	0.000526723	0.0240021	Chr3	31298866	31301009	+	2002	UDP-glucuronosyl/UDP-glucosyltransferase
LOC_Os07g46940	36.1175	42.1978	40.5873	99.6773	78.4922	171.647	39.6342	116.606	-1.55532	0.000530142	0.0241175	Chr7	28057781	28059098	+	1207	-
LOC_Os06g17390	533.265	425.066	478.029	982.668	836.966	2331.46	478.786	1383.7	-1.53095	0.000535142	0.0242636	Chr6	10082202	10087094	-	3072	GDP-fucose protein O-fucosyltransferase
LOC_Os01g12640	178.463	219.223	140.928	299.032	474.366	407.049	179.538	393.482	-1.13156	0.00054269	0.0244832	Chr1	6957017	6958745	-	1650	-
LOC_Os12g02370	454.656	544.455	431.804	1007.12	782.362	1943.05	476.972	1244.17	-1.38293	0.000547608	0.0246642	Chr12	766434	768572	-	1280	Chalcone isomerase
LOC_Os01g19200	10.6228	1.02922	4.50971	12.2246	72.52	84.3523	5.38724	56.3656	-3.38915	0.000568337	0.0253873	Chr1	10860048	10863321	-	3054	-
LOC_Os03g15330	4.24912	3.08765	1.12743	27.2702	14.504	29.4252	2.8214	23.7331	-3.06075	0.00058687	0.0260013	Chr3	8386579	8387055	-	477	-
LOC_Os12g38400	581.067	1458.4	873.755	2464.66	1935.86	3839.01	971.073	2746.51	-1.49981	0.000588228	0.026019	Chr12	23554928	23560551	-	1693	Homeobox domain-like
LOC_Os03g58190	38.2421	33.9641	21.4211	68.6457	94.7025	97.1032	31.2091	86.8172	-1.4737	0.000607916	0.0266787	Chr3	33138564	33141520	-	1542	-
LOC_Os03g62690	57.3631	41.1686	49.6068	85.5721	150.159	151.049	49.3795	128.927	-1.38528	0.000618649	0.0270127	Chr3	35474092	35479977	+	4655	DYW domain
LOC_Os11g42500	5.3114	10.2922	7.89198	24.4492	9.38494	299.156	7.83185	110.997	-3.82362	0.000621896	0.0270674	Chr11	25593755	25594897	+	1143	-
LOC_Os01g53930	911.436	1257.7	908.706	1542.18	2253.24	2729.68	1025.95	2175.03	-1.08396	0.000628567	0.027314	Chr1	31009006	31014001	-	2895	Hexokinase, N-terminal
LOC_Os11g17970	18.0588	30.8765	33.8228	61.1229	84.4644	107.892	27.586	84.4933	-1.61552	0.000631234	0.0273861	Chr11	10096106	10102801	+	2197	Proton-dependent oligopeptide transporter family
LOC_Os08g01514	174.214	165.704	208.574	311.257	338.711	324.658	182.83	324.875	-0.830246	0.000633969	0.0274172	Chr8	317389	318333	-	945	-
LOC_Os01g63880	66.9236	59.6945	55.2439	152.337	105.794	255.999	60.6207	171.377	-1.49787	0.000636446	0.027432	Chr1	37065393	37068896	-	2502	-
LOC_Os07g06620	5489.86	6145.44	6019.33	8261.93	10670.7	12180.1	5884.88	10370.9	-0.817451	0.000637443	0.027432	Chr7	3221592	3229297	+	1698	YABBY protein
LOC_Os10g36500	52.0517	36.0225	52.989	37.6141	542.62	306.022	47.0211	295.419	-2.65202	0.000637502	0.027432	Chr10	19530117	19532281	-	1444	Pectinesterase inhibitor domain
LOC_Os08g24360	41.4289	43.227	34.9502	108.141	112.619	74.5439	39.8687	98.4345	-1.3039	0.000656774	0.0279329	Chr8	14702765	14705177	-	432	-
LOC_Os03g61670	104.103	27.7888	147.693	212.52	561.39	445.302	93.195	406.404	-2.12582	0.000661793	0.02804	Chr3	34951952	34955910	-	2032	Calreticulin/calnexin
LOC_Os02g07330	0	6.17529	0	22.5685	42.6588	35.3103	2.05843	33.5125	-4.0013	0.0006661	0.0280723	Chr2	3772299	3776107	+	2031	-
LOC_Os03g13130	285.753	501.228	402.491	854.78	683.394	996.534	396.491	844.903	-1.09119	0.000667641	0.0280723	Chr3	7088192	7092500	+	2724	-
LOC_Os07g45480	33.993	20.5843	27.0582	43.2562	115.179	194.206	27.2118	117.547	-2.11096	0.000667724	0.0280723	Chr7	27132411	27137847	+	2706	Armadillo-type fold
LOC_Os05g42340	45.678	63.8113	66.5182	110.021	137.361	162.82	58.6692	136.734	-1.22088	0.000681001	0.0283826	Chr5	24774717	24775631	+	915	-
LOC_Os01g12570	0	0	1.12743	7.52282	14.504	24.521	0.375809	15.5159	-5.33486	0.000681375	0.0283826	Chr1	6912704	6915127	-	1625	Ketopantoate hydroxymethyltransferase
LOC_Os03g63060	105.166	126.593	125.144	234.148	232.917	613.025	118.968	360.03	-1.59707	0.000690391	0.0285458	Chr3	35657365	35659396	+	1933	-
LOC_Os10g32980	5535.54	2367.19	1582.91	7621.55	7797.18	24251.3	3161.88	13223.3	-2.06421	0.000692093	0.0285458	Chr10	17261952	17266613	+	3575	Cellulose synthase
LOC_Os11g02400	3767.91	7106.73	3997.85	9652.72	10146.8	14252.6	4957.5	11350.7	-1.19506	0.000700609	0.02883	Chr11	715400	716542	+	1143	-
novel.1205	40.3666	41.1686	45.0971	59.2422	183.433	205.977	42.2108	149.551	-1.8253	0.000709126	0.0290621	Chr9	15911116	15912960	-	1001	-
LOC_Os11g32610	3.18684	2.05843	0	7.52282	28.1548	47.0803	1.74842	27.586	-3.96429	0.000709459	0.0290621	Chr11	19236424	19238358	+	1206	Thiolase-like
LOC_Os05g32960	412.165	701.925	718.171	978.907	1588.61	1680.18	610.753	1415.9	-1.21312	0.000710608	0.0290654	Chr5	19311257	19313797	-	2541	-
LOC_Os02g19640	507.77	129.681	80.0473	702.443	792.601	2673.77	239.166	1389.6	-2.53839	0.000716896	0.0291656	Chr2	11478230	11484092	+	1797	IQ motif, EF-hand binding site
LOC_Os11g37280	0	0	0	206.877	0.853176	170.666	0	126.132	-9.32074	0.000717146	0.0291656	Chr11	22016848	22018539	+	941	-
LOC_Os03g02780	138.096	204.814	205.192	295.271	1023.81	456.091	182.701	591.724	-1.69583	0.000717354	0.0291656	Chr3	1080711	1081442	+	732	Histone-fold
LOC_Os09g07350	725.537	138.944	117.252	835.973	889.863	6153.79	327.245	2626.54	-3.00463	0.000718627	0.0291737	Chr9	3654972	3658804	+	1754	-
LOC_Os03g57460	2030.02	1198.01	872.628	2727.96	3012.56	9458.25	1366.88	5066.26	-1.88997	0.000726214	0.0293938	Chr3	32757006	32760635	-	2062	-
LOC_Os11g05740	12.7474	41.1686	28.1857	97.7966	66.5477	157.915	27.3672	107.42	-1.97072	0.000733255	0.0295752	Chr11	2631707	2633563	-	1643	B3 DNA binding domain
LOC_Os07g42104	3.18684	1.02922	0	21.6281	32.4207	10.7892	1.40535	21.6127	-3.93138	0.000741798	0.0298025	Chr7	25195551	25208995	+	1183	Cathepsin propeptide inhibitor domain (I29)
LOC_Os01g46400	143.408	295.385	304.405	504.969	581.866	697.378	247.733	594.738	-1.26356	0.000758445	0.0303488	Chr1	26401559	26403496	-	1770	-
LOC_Os09g25490	5293.34	2562.75	1854.62	7574.54	7041.26	21327.4	3236.9	11981.1	-1.88805	0.000766995	0.0305437	Chr9	15281268	15285910	+	3698	Cellulose synthase
LOC_Os11g13870	395.168	292.297	117.252	711.847	573.334	1967.57	268.239	1084.25	-2.0147	0.000768815	0.0305714	Chr11	7651046	7652401	-	1356	-
LOC_Os02g32650	36.1175	28.818	7.89198	103.439	52.0437	270.712	24.2758	142.065	-2.54588	0.000773242	0.0306314	Chr2	19352576	19354894	-	2084	-
LOC_Os11g36930	24.4324	28.818	18.0388	47.0176	84.4644	95.1415	23.7631	75.5412	-1.66617	0.000773633	0.0306314	Chr11	21783658	21789027	+	1864	-
LOC_Os06g11130	745.721	844.986	580.625	1263.83	1485.38	4921.86	723.777	2557.02	-1.82073	0.000773709	0.0306314	Chr6	5835562	5837122	+	1561	Alpha/beta hydrolase fold-3
LOC_Os06g08080	2396.5	2068.72	2014.71	1954.05	8779.18	19676.6	2159.98	10136.6	-2.23048	0.000779161	0.0308024	Chr6	3919501	3924409	+	2876	Pyrophosphate-energised proton pump
LOC_Os02g51680	285.753	515.637	511.852	966.682	989.684	814.098	437.747	923.488	-1.07715	0.000807077	0.0315842	Chr2	31663080	31665818	+	1423	Trehalose-phosphatase
LOC_Os03g01300	24.4324	11.3214	29.3131	50.779	97.2621	81.4098	21.689	76.4836	-1.82255	0.000845163	0.0324664	Chr3	208330	211839	+	806	-
LOC_Os06g44780	53.114	41.1686	33.8228	81.8106	117.738	118.682	42.7018	106.077	-1.3118	0.000847273	0.0325015	Chr6	27054106	27054779	+	674	-
LOC_Os04g41250	2.12456	3.08765	0	183.369	1.70635	8.82756	1.7374	64.6342	-5.205	0.000857539	0.0328027	Chr4	24471709	24479505	+	2939	Armadillo-type fold
LOC_Os10g07160	62.6745	82.3372	65.3907	145.755	127.976	165.762	70.1342	146.498	-1.06101	0.000866891	0.0329776	Chr10	3755107	3762605	-	2052	-
LOC_Os11g11890	49.9272	43.227	38.3325	457.011	69.1073	122.605	43.8289	216.241	-2.30217	0.000866988	0.0329776	Chr11	6596374	6603010	+	2178	Protein kinase domain
LOC_Os02g11705	25.4947	40.1394	22.5485	87.4528	68.2541	83.3714	29.3942	79.6928	-1.43517	0.000880408	0.0333022	Chr2	6020673	6021260	+	588	-
LOC_Os10g35100	1219.5	1402.82	1388.99	2040.56	2043.36	2038.19	1337.1	2040.7	-0.609971	0.000889415	0.0333911	Chr10	18723930	18725483	-	1554	-
LOC_Os03g29920	327.182	237.749	158.967	451.369	535.795	1545.8	241.299	844.323	-1.80659	0.000891731	0.0333911	Chr3	17046919	17049240	+	1580	Heavy metal-associated domain, HMA
LOC_Os05g09704	0	3.08765	0	14.1053	12.7976	46.0995	1.02922	24.3341	-4.52905	0.000893063	0.0333911	Chr5	5472689	5474678	-	1089	-
LOC_Os07g39750	275.131	332.436	290.876	434.443	639.029	614.006	299.481	562.493	-0.909341	0.000895052	0.0333911	Chr7	23819798	23824129	-	2725	-
LOC_Os04g38220	689.42	484.76	82.3021	1410.53	1042.58	5037.6	418.827	2496.9	-2.57552	0.000915236	0.0339575	Chr4	22744184	22748089	+	1889	Major facilitator, sugar transporter-like
LOC_Os06g12350	0	2.05843	0	124.126	1.70635	7.84672	0.686143	44.5599	-5.99204	0.000938615	0.0346758	Chr6	6691061	6695070	-	1759	-
LOC_Os06g05980	139.159	119.389	213.084	281.165	358.334	958.281	157.21	532.593	-1.76053	0.000939357	0.0346758	Chr6	2743656	2749242	+	2277	-
LOC_Os05g03610	70.1105	120.418	74.4101	174.906	190.258	319.754	88.3129	228.306	-1.36878	0.000942507	0.0347321	Chr5	1535708	1541571	+	2459	PLC-like phosphodiesterase, TIM beta/alpha-barrel domain
LOC_Os01g37460	3.18684	2.05843	2.25485	14.1053	11.0913	56.8888	2.50004	27.3618	-3.44921	0.000948494	0.0349053	Chr1	20935789	20937446	+	941	-
LOC_Os09g37060	31.8684	46.3147	72.1553	104.379	489.723	117.701	50.1128	237.268	-2.24485	0.000955967	0.0350853	Chr9	21375813	21378577	-	1607	Protein phosphatase 2A, regulatory B subunit, B56
LOC_Os05g13900	168.903	89.5417	91.3215	162.681	416.35	682.665	116.589	420.565	-1.85065	0.000959169	0.0351079	Chr5	7721628	7723149	-	1522	-
LOC_Os11g04380	13.8096	2.05843	13.5291	32.9123	23.8889	245.21	9.79906	100.67	-3.36314	0.000965433	0.0352398	Chr11	1818916	1820504	+	1589	-
LOC_Os06g24540	431.286	471.381	376.56	646.962	732.025	876.871	426.409	751.953	-0.817994	0.000966665	0.0352398	Chr6	14386815	14390244	-	3430	-
LOC_Os01g10930	171.027	155.411	142.056	226.625	371.985	464.918	156.165	354.509	-1.18245	0.000970319	0.0352435	Chr1	5828553	5830832	-	2280	-
LOC_Os04g33990	3253.76	2565.83	2184.95	5504.82	4383.62	16594.8	2668.18	8827.76	-1.72616	0.000970661	0.0352435	Chr4	20579349	20580533	-	1098	-
LOC_Os06g13830	181.65	201.726	179.261	314.078	391.608	1096.58	187.546	600.755	-1.67919	0.000980531	0.0355131	Chr6	7671255	7674778	-	1596	Six-hairpin glycosidase-like
LOC_Os03g44420	752.094	688.545	717.043	969.503	1592.03	1736.09	719.227	1432.54	-0.994073	0.000982006	0.0355131	Chr3	24996576	25000965	+	2204	Tubulin/FtsZ, GTPase domain
LOC_Os08g43270	1619.98	623.704	390.089	2096.99	2275.42	7077.75	877.924	3816.72	-2.12009	0.00100561	0.0360739	Chr8	27357415	27359108	-	1617	BAG domain
LOC_Os06g08090	274.068	443.592	378.815	397.769	1397.5	2350.09	365.492	1381.79	-1.91856	0.00100565	0.0360739	Chr6	3924681	3927945	-	2141	Glycoside hydrolase, family 79
LOC_Os03g05610	0	1.02922	0	63.944	1.70635	9.80841	0.343072	25.1529	-6.0322	0.0010073	0.0360739	Chr3	2804141	2805943	+	1803	Major facilitator, sugar transporter-like
LOC_Os03g56430	323.995	230.544	339.355	512.492	592.104	1243.71	297.965	782.767	-1.39343	0.00100814	0.0360739	Chr3	32164807	32168533	+	3230	-
LOC_Os03g18140	1743.2	1202.12	762.14	3149.24	1969.98	8500.95	1235.82	4540.06	-1.87716	0.00101093	0.0361261	Chr3	10147977	10153118	+	2867	-
LOC_Os04g58800	412.165	244.953	330.336	476.759	1304.51	874.91	329.151	885.392	-1.42783	0.00101847	0.0363477	Chr4	34975646	34977779	+	899	Ubiquitin-conjugating enzyme E2
LOC_Os06g17440	352.677	426.095	367.541	600.885	629.644	844.504	382.104	691.678	-0.855733	0.00103477	0.0368567	Chr6	10120875	10124422	+	1285	-
LOC_Os01g66980	183.774	109.097	163.477	265.179	323.354	381.547	152.116	323.36	-1.08838	0.0010527	0.0372998	Chr1	38900545	38902752	-	1058	Trigger factor, ribosome-binding, bacterial
LOC_Os11g24290	0	0	0	9.40352	3.4127	25.5019	0	12.7727	-6.0144	0.00106235	0.037568	Chr11	13837188	13841215	-	690	Peptidase S10, serine carboxypeptidase
LOC_Os06g04590	7.43596	11.3214	7.89198	31.972	25.5953	64.7355	8.8831	40.7676	-2.19349	0.0010709	0.0378212	Chr6	2000167	2000569	+	403	Small auxin-up RNA
LOC_Os01g04300	114.726	46.3147	102.596	227.565	163.81	682.665	87.8789	358.013	-2.02653	0.00109533	0.0385107	Chr1	1912561	1915094	-	2003	Glycoside hydrolase family 10 domain
LOC_Os04g15920	30.8061	67.9282	21.4211	77.1089	165.516	227.555	40.0518	156.727	-1.96581	0.00112721	0.0394002	Chr4	8637041	8639345	-	1649	Alcohol dehydrogenase, N-terminal
LOC_Os03g40720	0	2.05843	2.25485	63.0036	9.38494	9.80841	1.43776	27.399	-4.25617	0.00114294	0.0397674	Chr3	22641452	22657252	-	1970	UDP-glucose/GDP-mannose dehydrogenase, N-terminal
LOC_Os05g06780	192.273	478.585	225.485	494.625	717.521	3046.49	298.781	1419.55	-2.24801	0.00114374	0.0397674	Chr5	3539563	3540972	-	734	-
LOC_Os01g64180	56.3008	54.5484	29.3131	88.3931	124.564	287.386	46.7208	166.781	-1.83386	0.00114504	0.0397674	Chr1	37275755	37277400	-	1404	-
LOC_Os08g09610	697.918	936.586	1170.27	1509.27	1850.54	2181.39	934.924	1847.06	-0.982411	0.00119019	0.0411138	Chr8	5563233	5564424	-	1192	-
LOC_Os03g43470	32.9307	22.6427	32.6954	60.1825	76.7858	95.1415	29.4229	77.37	-1.396	0.00119864	0.0411138	Chr3	24250816	24252399	-	1584	-
LOC_Os03g08600	1866.43	907.768	942.528	1782.91	3667.8	6720.72	1238.91	4057.14	-1.71136	0.00119887	0.0411138	Chr3	4428836	4434164	+	2345	Glycosyl transferase, family 8
LOC_Os03g52070	11.6851	15.4382	22.5485	90.2738	26.4485	103.969	16.5573	73.5638	-2.15207	0.00121856	0.0415744	Chr3	29871085	29878401	+	3063	Peptidase S10, serine carboxypeptidase
LOC_Os11g30620	154.031	96.7462	46.2245	287.748	179.167	811.155	99.0004	426.023	-2.10457	0.00123489	0.0419753	Chr11	17829297	17831391	-	2001	-
LOC_Os03g25550	0	0	0	3.76141	4.26588	36.2911	0	14.7728	-6.22465	0.00124427	0.0421361	Chr3	14598168	14599572	-	1197	Homeobox domain-like
LOC_Os08g30719	28.6816	57.636	69.9004	94.0352	174.901	215.785	52.0727	161.574	-1.63439	0.00124615	0.0421472	Chr8	18950364	18951214	-	851	-
LOC_Os10g35450	400.48	368.459	359.649	529.418	697.898	777.807	376.196	668.374	-0.829073	0.00126396	0.0425706	Chr10	18970490	18975230	+	2418	Protein kinase domain
LOC_Os05g04170	1440.45	2371.31	1712.56	3317.56	3251.45	6573.59	1841.44	4380.87	-1.25031	0.00127467	0.0427102	Chr5	1866878	1873323	-	2530	AMP-dependent synthetase/ligase
LOC_Os01g24810	52.0517	25.7304	62.0084	79.9299	185.139	187.341	46.5968	150.803	-1.69634	0.00127538	0.0427102	Chr1	13977964	13979538	+	1575	Cytochrome P450
LOC_Os05g48900	7051.41	2910.62	3832.12	9111.07	9169.94	31595.8	4598.05	16625.6	-1.85431	0.0012774	0.0427253	Chr5	28051693	28052945	+	1253	-
LOC_Os01g24780	609.749	609.295	635.868	841.615	1232.84	1505.59	618.304	1193.35	-0.948606	0.00128566	0.0428626	Chr1	13941318	13944691	+	1807	Cytochrome P450
LOC_Os11g09979	0	0	0	2760.87	0	795.462	0	1185.45	-12.5531	0.00131301	0.0435615	Chr11	5349186	5354922	+	1964	-
LOC_Os01g57840	81.7956	137.915	68.773	222.863	242.302	198.13	96.1611	221.098	-1.19987	0.00132172	0.0436556	Chr1	33448306	33449348	+	919	Nuclear transport factor 2
LOC_Os04g31410	25.4947	21.6135	3.38228	31.972	63.135	327.601	16.8302	140.903	-3.06247	0.00133905	0.044028	Chr4	18786420	18787210	+	791	-
LOC_Os06g15250	2.12456	7.20451	2.25485	15.0456	31.5675	33.3486	3.86131	26.6539	-2.77704	0.00134632	0.0441359	Chr6	8645291	8646805	-	1515	FAE1/Type III polyketide synthase-like protein
LOC_Os02g15460	3.18684	3.08765	1.12743	19.7474	11.0913	33.3486	2.4673	21.3958	-3.10371	0.0013472	0.0441359	Chr2	8659209	8660522	-	1135	-
LOC_Os04g37480	28.6816	36.0225	25.9308	51.7194	88.7303	185.379	30.2116	108.61	-1.84412	0.00136838	0.0447472	Chr4	22321189	22323559	+	1337	-
LOC_Os05g42000	181.65	182.171	167.987	397.769	255.953	679.722	177.269	444.481	-1.32557	0.00138491	0.0450499	Chr5	24587145	24589539	+	2111	Haem peroxidase
LOC_Os05g43576	100.917	124.535	139.801	186.19	317.381	271.693	121.751	258.421	-1.08661	0.00138505	0.0450499	Chr5	25343800	25346261	+	1479	Radical SAM
LOC_Os08g43400	462.092	214.077	383.325	684.576	691.073	2177.47	353.164	1184.37	-1.74569	0.00140065	0.0454484	Chr8	27435126	27442742	-	3745	Kinesin motor domain
LOC_Os10g40100	200.771	259.362	384.452	469.236	628.791	948.473	281.528	682.166	-1.27709	0.00141227	0.0457012	Chr10	21467608	21472768	-	3635	Protein kinase domain
LOC_Os03g42420	0	1.02922	1.12743	13.1649	15.3572	13.7318	0.71888	14.0846	-4.29975	0.0014134	0.0457012	Chr3	23609771	23611885	+	1411	B3 DNA binding domain
LOC_Os02g45390	80.7333	79.2496	86.8118	156.098	150.159	339.371	82.2649	215.209	-1.38675	0.00143187	0.0462404	Chr2	27602320	27606781	+	1261	-
LOC_Os02g43870	310.186	328.32	308.915	464.534	640.735	1175.05	315.807	760.105	-1.26692	0.00143877	0.046353	Chr2	26494499	26497710	-	1901	Protein kinase domain
LOC_Os03g53150	302.75	546.513	370.923	462.653	1564.72	1931.28	406.729	1319.55	-1.69781	0.00145736	0.0467293	Chr3	30480660	30483331	-	1475	-
LOC_Os11g14560	0	0	0	4.70176	8.53176	18.636	0	10.6232	-5.74969	0.00146337	0.0467572	Chr11	8176414	8187419	-	4803	Reverse transcriptase, RNA-dependent DNA polymerase
novel.1082	61.6122	51.4608	31.5679	121.305	92.143	191.264	48.2136	134.904	-1.48186	0.0014658	0.0467798	Chr8	1084255	1086699	-	1405	PF06203:CCT motif
LOC_Os01g01660	58.4254	53.5192	42.8422	63.0036	164.663	471.784	51.5956	233.15	-2.17519	0.001471	0.0468359	Chr1	327128	328451	-	1207	NmrA-like domain
LOC_Os01g07420	355.864	330.378	198.427	399.65	760.18	2202.97	294.89	1120.93	-1.92619	0.00147539	0.0469204	Chr1	3516658	3519175	-	1519	-
LOC_Os08g06100	7656.91	6205.14	5120.77	12234.9	10082.8	38737.3	6327.61	20351.7	-1.6854	0.0014887	0.0471753	Chr8	3337751	3340959	-	1518	O-methyltransferase, family 2
LOC_Os08g43654	249.636	102.922	37.2051	301.853	382.223	1403.58	129.921	695.886	-2.42074	0.00149904	0.0471753	Chr8	27592835	27598700	-	1937	Multi antimicrobial extrusion protein
LOC_Os02g02040	328.245	151.295	205.192	508.731	403.552	1230.95	228.244	714.413	-1.646	0.00151016	0.0473698	Chr2	566043	572743	-	3419	Serine-threonine/tyrosine-protein kinase, catalytic domain
LOC_Os08g41940	74.3596	107.038	96.9587	137.291	348.096	239.325	92.7855	241.571	-1.38098	0.00151254	0.0473698	Chr8	26501167	26506218	+	1708	Transcription factor, SBP-box
novel.513	7.43596	9.26294	9.01941	18.807	54.6033	41.1953	8.57277	38.2019	-2.15743	0.00151767	0.0473775	Chr2	27504598	27505680	-	974	-
LOC_Os12g01740	388.794	197.609	352.884	540.703	656.092	1902.83	313.096	1033.21	-1.72246	0.00155034	0.048163	Chr12	439034	443732	-	2649	Protein kinase domain
LOC_Os04g26330	0	0	0	45.1369	0	27.4635	0	24.2001	-6.93828	0.00155278	0.048163	Chr4	15350426	15352064	-	333	-
LOC_Os02g51370	115.789	167.762	139.801	214.4	317.381	510.037	141.117	347.273	-1.29868	0.00155307	0.048163	Chr2	31461138	31462844	-	1707	Glutaredoxin
LOC_Os09g38340	2.12456	0	6.76456	28.2106	21.3294	29.4252	2.96304	26.3217	-3.17201	0.00155347	0.048163	Chr9	22064454	22070751	-	2494	Zinc finger C2H2-type
LOC_Os05g50910	121.1	112.184	218.721	326.302	277.282	693.454	150.668	432.346	-1.52115	0.00159718	0.0490806	Chr5	29213556	29220234	+	3547	-
LOC_Os05g02530	7952.23	5200.62	3597.62	4656.62	35245.6	30425.7	5583.49	23442.6	-2.06989	0.00161046	0.049255	Chr5	876950	880628	-	1385	Glutathione S-transferase, N-terminal
LOC_Os08g33430	2.12456	3.08765	1.12743	26.3299	8.53176	24.521	2.11321	19.7942	-3.21434	0.00162521	0.0495551	Chr8	20855162	20858214	+	2806	-
LOC_Os12g37650	1764.45	1894.79	947.038	2810.71	2953.7	7672.13	1535.42	4478.85	-1.5444	0.00162574	0.0495551	Chr12	23115425	23116552	+	1128	-
LOC_Os07g06680	1696.46	1450.16	1432.96	2692.23	2498.95	7272.93	1526.53	4154.7	-1.44444	0.00162942	0.0496114	Chr7	3258237	3262151	+	2045	-
LOC_Os02g16030	300.625	205.843	204.064	522.836	360.04	1177.99	236.844	686.955	-1.53593	0.00165197	0.0498363	Chr2	9106572	9111711	+	1279	-
LOC_Os06g21270	0	0	0	15.0456	0.853176	29.4252	0	15.108	-6.25728	0.00165332	0.0498363	Chr6	12297993	12298985	+	769	-
LOC_Os07g10530	175.276	499.169	237.887	628.155	868.533	919.048	304.111	805.245	-1.40445	0.00165744	0.0498547	Chr7	5682011	5685298	+	1845	-
LOC_Os10g11820	8.49824	27.7888	37.2051	66.765	95.5557	104.95	24.4974	89.0902	-1.86474	0.00165786	0.0498547	Chr10	6552107	6555101	-	2995	-
LOC_Os03g63810	8.49824	10.2922	5.63713	32.9123	23.8889	42.1761	8.14251	32.9925	-2.01161	0.00165944	0.0498547	Chr3	36039164	36043822	+	1624	WRKY domain
