# Supplementary material
Source: MDPI journal article supplement (https://www.mdpi.com/2077-0472/12/10/1685)
Supplement: s1 [file s1 › Table S3.xlsx]

## Sheet: Sheet1
Table S3. List of differentially expressed genes between osccr18 mutants and WT plants that were previously reported to be male fertility-related in rice
gene_id	ccr18_1	ccr18_2	ccr18_3	WT_1	WT_2	WT_3	ccr18	WT	log2FoldChange	pvalue	padj	gene_name	references
LOC_Os11g37280	0	0	0	206.877	0.853176	170.666	0	126.132	-9.32074	0.000717146	0.0291656	OsC6/Osg6B	OsC6, Encoding a Lipid Transfer Protein, Is Required for Postmeiotic Anther Development In Rice
LOC_Os04g24530	0	1.02922	0	0	2.55953	291.31	0.343072	97.9564	-7.99417	NA	1	OsACOS12	Rice fatty acyl-CoA synthetase OsACOS12 is required for tapetum programmed cell death and male fertility
LOC_Os06g40550	0	0	0	0.940352	0	57.8696	0	19.6033	-6.63402	0.0101889	0.142092	OsABCG15/PDA1	Post-meiotic deficient anther1 (PDA1) encodes an ABC transporter required for the development of anther cuticle and pollen exine(科研通-ablesci.com)
LOC_Os02g02820	0	38.081	5.63713	173.965	22.1826	63.7546	14.5727	86.6341	-2.56869	0.0383612	0.287407	TDR	A Novel Rice bHLH Transcription Factor, DTD, Acts Coordinately with TDR in Controlling Tapetum Function and Pollen Development
LOC_Os06g08380	25.4947	4.11686	7.89198	154.218	7.67858	38.2528	12.5012	66.7164	-2.41536	0.0243711	0.22743	GSL5	GLUCAN SYNTHASE-LIKE 5 (GSL5) Plays an Essential Role in Male Fertility by Regulating Callose Metabolism During Microsporogenesis in Rice
LOC_Os04g51070	9.56052	2.05843	0	27.2702	0.853176	14.7126	3.87298	14.2787	-1.87727	0.224305	0.621891	EAT1/DTD	A Novel Rice bHLH Transcription Factor, DTD, Acts Coordinately with TDR in Controlling Tapetum Function and Pollen Development
LOC_Os07g35610	240.075	414.774	367.541	628.155	1009.31	786.634	340.797	808.032	-1.24563	0.000222809	0.0137909	DTC1	Defective Tapetum Cell Death 1 (DTC1) Regulates ROS Levels by Binding to Metallothionein during Tapetum Degeneration
LOC_Os06g40570	7.43596	14.409	3.38228	16.9263	12.7976	20.5977	8.40908	16.7739	-0.987313	0.224371	0.621891	Osnop	The Oryza sativa no pollen (Osnop) gene plays a role in male gametophyte development and most likely encodes a C2-GRAM domain-containing protein
LOC_Os10g33250	918.872	5358.09	1770.06	5186.04	3143.1	7495.58	2682.34	5274.91	-0.975604	0.121087	0.484989	Wda1	Wax-deficient anther1 Is Involved in Cuticle and Wax Production in Rice Anther Walls and Is Required for Pollen Development
LOC_Os10g35180	1038.91	707.071	705.769	1421.81	1035.76	812.136	817.25	1089.9	-0.41535	0.207904	0.603672	OsABCG26	An ABC transporter, OsABCG26, is required for anther cuticle and pollen exine formation and pollen-pistil interactions in rice
LOC_Os07g36460	21.2456	49.4023	34.9502	24.4492	50.3374	42.1761	35.1994	38.9876	-0.147866	0.792561	0.945372	Udt1	Identification of gamyb-4 and Analysis of the Regulatory Role of GAMYB in Rice Anther Development
LOC_Os07g43010	380.296	304.648	307.787	416.576	319.941	330.543	330.91	355.687	-0.103944	0.688934	0.908765	DTM1	The rice gene DEFECTIVE TAPETUM AND MEIOCYTES 1 (DTM1) is required for early tapetum development and meiosis
LOC_Os01g59660	275.131	454.913	567.095	572.675	411.231	370.758	432.38	451.554	-0.0628022	0.865876	0.967653	MYBGA	Identification of gamyb-4 and Analysis of the Regulatory Role of GAMYB in Rice Anther Development
LOC_Os05g05280	439.784	470.351	471.264	471.116	465.834	472.765	460.466	469.905	-0.0292669	0.880942	0.971432	PTB1	Natural variation in PTB1 regulates rice seed setting rate by controlling pollen tube growth
LOC_Os08g02380	293.189	316.998	328.081	283.046	340.417	298.176	312.756	307.213	0.0252441	0.912121	0.979684	pss-1	Pollen Semi-Sterility1 Encodes a Kinesin-1–Like Protein Important for Male Meiosis, Anther Dehiscence, and Fertility in Rice
LOC_Os10g11140	1149.39	1313.28	1487.08	1278.88	1516.09	970.051	1316.58	1255.01	0.0688457	0.800976	0.948144	OspPGM	Plastidic phosphoglucomutase and ADP-glucose pyrophosphorylase mutants impair starch synthesis in rice pollen grains and cause male sterility
LOC_Os01g15780	1257.74	1152.72	1120.66	1234.68	944.466	1018.11	1177.04	1065.75	0.143423	0.514872	0.828376	OsGT1	Rice GLYCOSYLTRANSFERASE1 Encodes a Glycosyltransferase Essential for Pollen Wall Formation
LOC_Os03g18480	0	1.02922	0	0	0.853176	0	0.343072	0.284392	0.215829	0.957817	1	OsTDF1	The functional analysis of OsTDF1 reveals a conserved genetic pathway for tapetal development between rice and Arabidopsis
LOC_Os12g03822	245.387	261.421	295.386	236.969	205.615	170.666	267.398	204.417	0.386891	0.150604	0.532184	RIP1	Rice Immature Pollen 1 (RIP1) is a Regulator of Late Pollen Development
LOC_Os08g31219	72.235	46.3147	96.9587	41.3755	65.6946	55.9079	71.8361	54.326	0.400506	0.379966	0.751273	S-27	Independent evolution of a new allele of F1 pollen sterility gene S27 encoding mitochondrial ribosomal protein L27 in Oryza nivara
LOC_Os12g28750	90.2938	237.749	164.604	164.562	77.639	97.1032	164.216	113.101	0.538733	0.278527	0.674465	OsTDL1A/MIL2	Reproductive cells and peripheral parietal cells collaboratively participate in meiotic fate acquisition in rice anthers
LOC_Os02g04840	1764.45	1513.98	1363.06	1046.61	1071.59	961.224	1547.16	1026.47	0.5919	0.0057685	0.101996	CAP1	COLLAPSED ABNORMAL POLLEN1 Gene Encoding the Arabinokinase-Like Protein Is Involved in Pollen Development in Rice
LOC_Os03g07250	11.6851	7.20451	6.76456	13.1649	28.1548	297.195	8.55138	112.838	-3.72067	0.000441704	0.0215372	CYP704B2	Cytochrome P450 family member CYP704B2 catalyzes the omega-hydroxylation of fatty acids and is required for anther cutin biosynthesis and pollen exine formation in rice.
LOC_Os08g03682	46.7403	17.4967	47.3519	25.3895	63.135	175.57	37.1963	88.0317	-1.24306	0.104931	0.453917	CYP703A3	Rice CYP703A3, a cytochrome P450 hydroxylase, is essential for development of anther cuticle and pollen exine
LOC_Os03g07140	40.3666	59.6945	262.69	103.439	64.8414	147.126	120.917	105.135	0.201396	0.782991	0.941941	DPW	Defective Pollen Wall Is Required for Anther and Microspore Development in Rice and Encodes a Fatty Acyl Carrier Protein Reductase
LOC_Os02g20930	809.457	705.012	786.944	716.548	888.156	681.684	767.138	762.13	0.00906184	0.968352	0.993595	OSAPI5	Rice APOPTOSIS INHIBITOR5 Coupled with Two DEAD-Box Adenosine 5′-Triphosphate-Dependent RNA Helicases Regulates Tapetum Degeneration
